# Supplementary material
Source: publisher site journal article supplement (https://www.degruyterbrill.com/publication/isbn/9781501506208/downloadAsset/9781501506208_additional%20material.zip)
Supplement: Supplementary file 1 [file Figure 1.2.xlsx]

## Sheet: Figure 1.2
Millers' Tax Computation
Known Parameters
Retirement Savings %	0.07
Maximum savings	8000
Personal exemption	4050	per person
Standard deduction	12700
Tax rates	0.1	1	to	18650
	0.15	18651	to	75900
	0.25	75901	to	153100
Variables
Sue's estimated income
Rob's estimated income
Tax Computation
Total income	0
Retirement savings	0
Personal exemptions	8100
Standard deduction	12700
Taxable income	0
Tax @ 10% rate	0
Tax @ 15% rate	0
Tax @ 25% rate	0
Total tax	0
Estimated tax per quarter	0

## Sheet: Figure 1.3
Millers' Tax Computation
Known Parameters
Retirement Savings %	0.07
Maximum savings	8000
Personal exemption	4050	per person
Standard deduction	12700
Tax rates	0.1	1	to	18650
	0.15	18651	to	75900
	0.25	75901	to	153100
Variables
Sue's estimated income	65000
Rob's estimated income	60000
Tax Computation
Total income	125000
Retirement savings	8000
Personal exemptions	8100
Standard deduction	12700
Taxable income	96200
Tax @ 10% rate	1865
Tax @ 15% rate	8587.5
Tax @ 25% rate	5075
Total tax	15527.5
Estimated tax per quarter	3881.88
