# Supplementary material
Source: publisher site journal article supplement (https://www.degruyterbrill.com/publication/isbn/9781501506208/downloadAsset/9781501506208_additional%20material.zip)
Supplement: Supplementary file 2 [file Figure 1.4.xlsx]

## Sheet: Figure 1.4
Bill Pritchett's Shop
Known Parameters
Selling price per unit	10
Fixed cost	1000
Variable cost per unit	5
Variables
Number of units, X
Results
Total revenue	0
Fixed cost	1000
Total variable cost	0
Total cost	1000
Profit	-1000

## Sheet: Figure 1.5
Bill Pritchett's Shop
Known Parameters
Selling price per unit	10
Fixed cost	1000
Variable cost per unit	5
Variables
Number of units, X	1000
Results
Total revenue	10000
Fixed cost	1000
Total variable cost	5000
Total cost	6000
Profit	4000

## Sheet: Figure 1.6
Bill Pritchett's Shop
Known Parameters
Selling price per unit	10
Fixed cost	1000
Variable cost per unit	5
Variables
Number of units, X	200
Results
Total revenue	2000
Fixed cost	1000
Total variable cost	1000
Total cost	2000
Profit	0
