# Supplementary material
Source: publisher site journal article supplement (https://www.degruyterbrill.com/publication/isbn/9781501506208/downloadAsset/9781501506208_additional%20material.zip)
Supplement: Supplementary file 2 [file Managerial Decision Modeling 4th Edition Errata (Updated Apr2018).pdf › Managerial Decision Modeling 4th Edition Errata (Updated Apr2018).pdf]

Managerial Decision Modeling: Business Analytics with Spreadsheets  
Balakrishnan, Render, Stair, and Munson  
Fourth Edition

Errata

| Chapter    | Page | Location                                                        | As Printed in Text                                          | Correct Text                                                      |
|------------|------|-----------------------------------------------------------------|-------------------------------------------------------------|-------------------------------------------------------------------|
| 2          | 43   | Line -2                                                         | $T \leq 100$                                                | $T \geq 100$                                                      |
| 2          | 100  | Line -3 (Problem 2-55)                                          | $B \leq 0.25(A + B + Y + Z)$                                | $B \leq 0.25(A + B + C + D)$                                      |
| 4          | 236  | Problem 4-38, part (b)                                          | maximum tables                                              | minimum tables                                                    |
| 4          | 236  | Problem 4-38, part (c)                                          | maximum tables                                              | minimum tables                                                    |
| 6          | 380  | Line 7                                                          | $50q_1 + 45q_2 + 40q_1$                                     | $50q_1 + 45q_2 + 40q_3$                                           |
| 6          | 381  | Problem 6-52, part (e)                                          | $10A - 4A^2 = 2$                                            | $10A - 4A^2 = 2$                                                  |
| 7          | 447  | Immediate Predecessors for Activity T in Table for Problem 7-42 | E,P,V                                                       | E,V                                                               |
| 8          | 475  | Line -1                                                         | $P(LD NS) = 0.443$                                          | $P(LD NS) = 0.434$                                                |
| 10         | 645  | Line 9                                                          | The Switcher's Choice would simply cell-reference column B. | The Switcher's Choice would be =IF(B4=D4,"Wrong",B4) [for row 4]. |
| 11         | 669  | Table 11.4                                                      | 2007 80                                                     | 2007 82                                                           |
| 11         | 669  | Table 11.4                                                      | 2010 142                                                    | 2010 117                                                          |
| Appendix D |      | 1-33 (c)                                                        | \$4,122.50                                                  | \$3,616.25                                                        |
|            |      | 11-49 (b)                                                       | 482.88                                                      | 496.88                                                            |
|            |      | 11-55 (b)                                                       | second student = 3.83                                       | second student = 4.01                                             |
