# Supplementary material
Source: publisher site journal article supplement (https://www.degruyterbrill.com/publication/isbn/9781501506208/downloadAsset/9781501506208_additional%20material.zip)
Supplement: Supplementary file 3 [file Figure 2.14.xlsx]

## Sheet: Figure 2.14
Flair Furniture
	T	C
	Tables	Chairs
Number of units
Profit	7	5	0
Constraints:
Carpentry hours	3	4	0	<=	2400
Painting hours	2	1	0	<=	1000
Maximum chairs		1	0	<=	450
Minimum tables	1		0	>=	100
			LHS	Sign	RHS

## Sheet: Figure 2.18
Flair Furniture
	T	C
	Tables	Chairs
Number of units	320	360
Profit	7	5	4040
Constraints:
Carpentry hours	3	4	2400	<=	2400
Painting hours	2	1	1000	<=	1000
Maximum chairs		1	360	<=	450
Minimum tables	1		320	>=	100
			LHS	Sign	RHS

## Sheet: Figure 2.19
Microsoft Excel 14.0 Answer Report
Worksheet: [Figure 2.14.xlsx]Figure 2.19
Result: Solver found a solution. All Constraints and optimality conditions are satisfied.
Solver Engine
	Engine: Simplex LP
	Solution Time: 0.015 Seconds.
	Iterations: 3 Subproblems: 0
Solver Options
	Max Time 100 sec, Iterations 100, Precision 0.000001
	Max Subproblems 5000, Max Integer Sols 5000, Integer Tolerance 0.05%, Assume NonNegative
Objective Cell (Max)
	Cell	Name	Original Value	Final Value
	$D$6	Profit	0	4040
Variable Cells
	Cell	Name	Original Value	Final Value	Integer
	$B$5	Number of units Tables	0	320	Contin
	$C$5	Number of units Chairs	0	360	Contin
Constraints
	Cell	Name	Cell Value	Formula	Status	Slack
	$D$8	Carpentry hours	2400	$D$8<=$F$8	Binding	0
	$D$9	Painting hours	1000	$D$9<=$F$9	Binding	0
	$D$10	Maximum chairs	360	$D$10<=$F$10	Not Binding	90
	$D$11	Minimum tables	320	$D$11>=$F$11	Not Binding	220
