# Supplementary material
Source: publisher site journal article supplement (https://www.degruyterbrill.com/publication/isbn/9781501506208/downloadAsset/9781501506208_additional%20material.zip)
Supplement: Supplementary file 4 [file Figure 2.20.xlsx]

## Sheet: Figure 2.20
Flair Furniture - Modified Problem
	T	C
	Tables	Chairs
Number of units	300	375
Profit	7	5	3975
Constraints:
Carpentry hours	3	4	2400	<=	2400
Painting hours	2	1	975	<=	1000
Maximum chairs	0	1	375	<=	450
Minimum tables	1	0	300	>=	100
Tables vs Chairs	-1	1	75	>=	75
			LHS	Sign	RHS
