# Supplementary material
Source: publisher site journal article supplement (https://www.degruyterbrill.com/publication/isbn/9781501506208/downloadAsset/9781501506208_additional%20material.zip)
Supplement: Supplementary file 5 [file Figure 2.21.xlsx]

## Sheet: Figure 2.21
Holiday Meal Turkey Ranch
	A	B
	Brand A	Brand B
Number of pounds
Cost	0.1	0.15	0
Constraints:
Protein required	5	10	0	>=	45
Vitamin required	4	3	0	>=	24
Iron required	0.5		0	>=	1.5
			LHS	Sign	RHS

## Sheet: Figure 2.22
Holiday Meal Turkey Ranch
	A	B
	Brand A	Brand B
Number of pounds	4.2	2.4
Cost	0.1	0.15	0.78
Constraints:
Protein required	5	10	45	>=	45
Vitamin required	4	3	24	>=	24
Iron required	0.5	0	2.1	>=	1.5
			LHS	Sign	RHS
