# Supplementary material
Source: publisher site journal article supplement (https://www.degruyterbrill.com/publication/isbn/9781501506208/downloadAsset/9781501506208_additional%20material.zip)
Supplement: Supplementary file 6 [file Figure 2.24.xlsx]

## Sheet: Figure 2.24
Solved Problem 2-1
	X	Y
Solution value	3	2
Profit	30	40	170
Constraints:
Constraint 1	4	2	16	<=	16
Constraint 2		1	2	<=	2
Constraint 3	2	-1	4	>=	2
			LHS	Sign	RHS
