# Supplementary material
Source: publisher site journal article supplement (https://www.degruyterbrill.com/publication/isbn/9781501506208/downloadAsset/9781501506208_additional%20material.zip)
Supplement: Supplementary file 7 [file Figure 2.26.xlsx]

## Sheet: Figure 2.26
Solved Problem 2-2
	X	Y
Solution value	200	100
Cost	24	28	7600
Constraints:
Constraint 1	5	4	1400	<=	2000
Constraint 2	1	1	300	>=	300
Constraint 3	1	0	200	>=	80
Constraint 4	0	1	100	>=	100
			LHS	Sign	RHS
