# Supplementary material
Source: publisher site journal article supplement (https://www.degruyterbrill.com/publication/isbn/9781501506208/downloadAsset/9781501506208_additional%20material.zip)
Supplement: Supplementary file 8 [file Figure 3.1.xlsx]

## Sheet: Figure 3.1
Fifth Avenue Industries
	S	P	B1	B2
	All silk	All poly	Blend-1	Blend-2
Number of units
Selling price	6.7	3.55	4.31	4.81	0
Labor cost	0.75	0.75	0.75	0.75	0
Material cost	2.5	0.48	0.75	0.81	0
Profit	3.45	2.32	2.81	3.25	0
Constraints:								Cost/Yd
Yards of silk	0.125				0	<=	1000	20
Yards of polyester		0.08	0.05	0.03	0	<=	2000	6
Yards of cotton			0.05	0.07	0	<=	1250	9
Maximum all silk	1				0	<=	7000
Maximum all poly		1			0	<=	14000
Maximum blend-1			1		0	<=	16000
Maximum blend-2				1	0	<=	8500
Minimum all silk	1				0	>=	6000
Minimum all poly		1			0	>=	10000
Minimum blend-1			1		0	>=	13000
Minimum blend-2				1	0	>=	6000
					LHS	Sign	RHS

## Sheet: Figure 3.2
Fifth Avenue Industries
	S	P	B1	B2
	All silk	All poly	Blend-1	Blend-2
Number of units	7000	13625	13100	8500
Selling price	6.7	3.55	4.31	4.81	192615
Labor cost	0.75	0.75	0.75	0.75	31668.8
Material cost	2.5	0.48	0.75	0.81	40750
Profit	3.45	2.32	2.81	3.25	120196
Constraints:								Cost/Yd
Yards of silk	0.125				875	<=	1000	20
Yards of polyester		0.08	0.05	0.03	2000	<=	2000	6
Yards of cotton			0.05	0.07	1250	<=	1250	9
Maximum all silk	1				7000	<=	7000
Maximum all poly		1			13625	<=	14000
Maximum blend-1			1		13100	<=	16000
Maximum blend-2				1	8500	<=	8500
Minimum all silk	1				7000	>=	6000
Minimum all poly		1			13625	>=	10000
Minimum blend-1			1		13100	>=	13000
Minimum blend-2				1	8500	>=	6000
					LHS	Sign	RHS
