# Supplementary material
Source: publisher site journal article supplement (https://www.degruyterbrill.com/publication/isbn/9781501506208/downloadAsset/9781501506208_additional%20material.zip)
Supplement: Supplementary file 9 [file Figure 3.11.xlsx]

## Sheet: Figure 3.11
Goodman Shipping (Allocation)
	W11	W21	W31	W41	W51	W61	W12	W22	W32	W42	W52	W62
	Item 1 Truck 1	Item 2 Truck 1	Item 3 Truck 1	Item 4 Truck 1	Item 5 Truck 1	Item 6 Truck 1	Item 1 Truck 2	Item 2 Truck 2	Item 3 Truck 2	Item 4 Truck 2	Item 5 Truck 2	Item 6 Truck 2
Weight in pounds	4794.39	4500	0	0	0	705.607	205.607	0	3000	465.116	4000	2329.28
Load value	3.1	3.2	3.45	4.15	3.25	2.75	3.1	3.2	3.45	4.15	3.25	2.75	63526.2
Constraints:
Weight limit truck #1	1	1	1	1	1	1							10000	<=	10000
Volume limit truck #1	0.125	0.064	0.144	0.448	0.048	0.018							900	<=	900
Weight limit truck #2							1	1	1	1	1	1	10000	<=	10000
Volume limit truck #2							0.125	0.064	0.144	0.448	0.048	0.018	900	<=	900
Item 1 limit (pounds)	1						1						5000	<=	5000
Item 2 limit (pounds)		1						1					4500	<=	4500
Item 3 limit (pounds)			1						1				3000	<=	3000
Item 4 limit (pounds)				1						1			465.116	<=	3500
Item 5 limit (pounds)					1						1		4000	<=	4000
Item 6 limit (pounds)						1						1	3034.88	<=	3500
Same weight	1	1	1	1	1	1							10000	=	10000
													LHS	Sign	RHS
