# Supplementary material
Source: publisher site journal article supplement (https://www.degruyterbrill.com/publication/isbn/9781501506208/downloadAsset/9781501506208_additional%20material.zip)
Supplement: Supplementary file 10 [file Figure 3.12.xlsx]

## Sheet: Figure 3.12
Whole Food Nutrition Center
	A	B	C
	Grain A	Grain B	Grain C
Number of pounds	0.025	0.05	0.05
Cost	0.33	0.47	0.38	0.05075
Constraints:
Protein	22	28	21	3	>=	3
Riboflavin	16	14	25	2.35	>=	2
Phosphorus	8	7	9	1	>=	1
Magnesium	5		6	0.425	>=	0.425
Total Mix	1	1	1	0.125	=	0.125
				LHS	Sign	RHS
