# Supplementary material
Source: publisher site journal article supplement (https://www.degruyterbrill.com/publication/isbn/9781501506208/downloadAsset/9781501506208_additional%20material.zip)
Supplement: Supplementary file 11 [file Figure 3.13.xlsx]

## Sheet: Figure 3.13
Low Knock Oil Company
	P1	P2	P3	R1	R2	R3	E1	E2	E3
	X100 in premium	X200 in premium	X300 in premium	X100 in regular	X200 in regular	X300 in regular	X100 in economy	X200 in economy	X300 in economy
Number of barrels	2500	0	11500	0	22000	0	12500	10000	2500
Cost	86	92	95	86	92	95	86	92	95	5.564e+06
Constraints:
Premium demand	1	1	1							14000	>=	14000
Regular demand				1	1	1				22000	>=	22000
Economy demand							1	1	1	25000	>=	25000
A in premium	0.35	0.5	0.6							7775	>=	7700
B in regular				0.25	0.3	0.2				6600	>=	5500
A in economy							0.35	0.5	0.6	10875	>=	10000
X100 available	1			1			1			15000	<=	15000
X200 available		1			1			1		32000	<=	32000
X300 available			1			1			1	14000	<=	24000
B in premium	0.25	0.3	0.2							2925	<=	3220
C in regular				0.35	0.15	0.15				3300	<=	7700
C in economy							0.35	0.15	0.15	6250	<=	6250
										LHS	Sign	RHS
