# Supplementary material
Source: publisher site journal article supplement (https://www.degruyterbrill.com/publication/isbn/9781501506208/downloadAsset/9781501506208_additional%20material.zip)
Supplement: Supplementary file 12 [file Figure 3.14.xlsx]

## Sheet: Figure 3.14
Greenberg Motors
	PA1	IA1	PA2	IA2	PA3	IA3	PA4	IA4	PB1	IB1	PB2	IB2	PB3	IB3	PB4	IB4
	GM3A Jan prod	GM3A Jan inv	GM3A Feb prod	GM3A Feb inv	GM3A Mar prod	GM3A Mar inv	GM3A Apr prod	GM3A Apr inv	GM3B Jan prod	GM3B Jan inv	GM3B Feb prod	GM3B Feb inv	GM3B Mar prod	GM3B Mar inv	GM3B Apr prod	GM3B Apr inv
Number of Units	1276.92	476.923	1138.46	915.385	842.308	757.692	792.308	450	1000	0	1200	0	1400	0	1700	300
Cost	10	0.18	10	0.18	11	0.18	11	0.18	6	0.13	6	0.13	6.6	0.13	6.6	0.13	76301.6
Constraints:
GM3A Jan balance	1	-1															800	=	800
GM3B Jan balance									1	-1							1000	=	1000
GM3A Feb balance		1	1	-1													700	=	700
GM3B Feb balance										1	1	-1					1200	=	1200
GM3A Mar balance				1	1	-1											1000	=	1000
GM3B Mar balance												1	1	-1			1400	=	1400
GM3A Apr balance						1	1	-1									1100	=	1100
GM3B Apr balance														1	1	-1	1400	=	1400
GM3A Apr Inventory								1									450	=	450
GM3B Apr Inventory																1	300	=	300
Jan storage cap		1								1							476.923	<=	3300
Feb storage cap				1								1					915.385	<=	3300
Mar storage cap						1								1			757.692	<=	3300
Apr storage cap								1								1	750	<=	3300
Jan labor max	1.3								0.9								2560	<=	2560
Feb labor max			1.3								0.9						2560	<=	2560
Mar labor max					1.3								0.9				2355	<=	2560
Apr labor max							1.3								0.9		2560	<=	2560
Jan labor min	1.3								0.9								2560	>=	2240
Feb labor min			1.3								0.9						2560	>=	2240
Mar labor min					1.3								0.9				2355	>=	2240
Apr labor min							1.3								0.9		2560	>=	2240
																	LHS	Sign	RHS

## Sheet: Figure 3.15
Greenberg Motors (Alternate Model)
	PA1	PA2	PA3	PA4	PB1	PB2	PB3	PB4
	GM3A January	GM3A February	GM3A March	GM3A April	GM3B January	GM3B February	GM3B March	GM3B April
Beginning inv	0	476.923	915.385	757.692	0	0	0	0
Production	1276.92	1138.46	842.308	792.308	1000	1200	1400	1700
Demand	800	700	1000	1100	1000	1200	1400	1400
Ending inv	476.923	915.385	757.692	450	0	0	0	300
	Total inv	Sign	Cap			Needed	Min (>=)	Max (<=)
Jan storage	476.923	<=	3300		Jan labor	2560	2240	2560
Feb storage	915.385	<=	3300		Feb labor	2560	2240	2560
Mar storage	757.692	<=	3300		Mar labor	2355	2240	2560
Apr storage	750	<=	3300		Apr labor	2560	2240	2560
	Have	Sign	Need
GM3A Apr inv	450	=	450
GM3B Apr inv	300	=	300
Prodn cost	10	10	11	11	6	6	6.6	6.6	75794.6
Inv cost	0.18	0.18	0.18	0.18	0.13	0.13	0.13	0.13	507
								Total Cost =	76301.6
