# Supplementary material
Source: publisher site journal article supplement (https://www.degruyterbrill.com/publication/isbn/9781501506208/downloadAsset/9781501506208_additional%20material.zip)
Supplement: Supplementary file 13 [file Figure 3.16.xlsx]

## Sheet: Figure 3.16
Larry Fredendall's Sinking Fund
	A1	B1	C1	D1	A2	B2	C2	D2	A3	B3	C3	A4	B4	A5
	Inv A Year 1	Inv B Year 1	Inv C Year 1	Inv D Year 1	Inv A Year 2	Inv B Year 2	Inv C Year 2	Inv D Year 2	Inv A Year 3	Inv B Year 3	Inv C Year 3	Inv A Year 4	Inv B Year 4	Inv A Year 5
$ Invested	0	61064.1	3804.66	8445.95	0	0	0	0	38227.5	10774.9	0	0	23008.8	0
Objective coeff	1	1	1	1											73314.7
Constraints:
Y2 cash flow	1.05				-1	-1	-1	-1							0	=	0
Y3 cash flow		1.13			1.05				-1	-1	-1				20000	=	20000
Y4 cash flow			1.28			1.13			1.05			-1	-1		22000	=	22000
Y5 cash flow				1.4			1.28			1.13		1.05		-1	24000	=	24000
Y6 cash flow								1.4			1.28		1.13	1.05	26000	=	26000
Y1 risk			1	1											12250.6	<=	14662.9
Y2 risk			1	1			1	1							12250.6	<=	14662.9
Y3 risk			1	1			1	1			1				12250.6	<=	12250.6
Y4 risk				1			1	1			1				8445.95	<=	8445.95
Y5 risk								1			1				0	<=	4601.77
															LHS	Sign	RHS
