# Supplementary material
Source: publisher site journal article supplement (https://www.degruyterbrill.com/publication/isbn/9781501506208/downloadAsset/9781501506208_additional%20material.zip)
Supplement: Supplementary file 14 [file Figure 3.17.xlsx]

## Sheet: Figure 3.17
Loughry Group Mall
	S1	S2	S3	S4	S5	S6	S7	S8
	Sat & Sun off	Sat & Tue off	Tue & Wed off	Mon & Thu off	Tue & Fri off	Thu & Fri off	Sun & Thu off	Sun & Wed off
Number of staff	10	7	20	0	0	0	0	3
Wages	350	375	400	425	425	400	375	375	15250
Constraints:
Monday needs	1	1	1		1	1	1	1	40	>=	22
Tuesday needs	1			1		1	1	1	13	>=	13
Wednesday needs	1	1		1	1	1	1		17	>=	15
Thursday needs	1	1	1		1			1	40	>=	20
Friday needs	1	1	1	1			1	1	40	>=	18
Saturday needs			1	1	1	1	1	1	23	>=	23
Sunday needs		1	1	1	1	1			27	>=	27
75% consecutive	1		1			1			30	>=	30
50% weekend day	1	1					1	1	20	>=	20
									LHS	Sign	RHS
