# Supplementary material
Source: publisher site journal article supplement (https://www.degruyterbrill.com/publication/isbn/9781501506208/downloadAsset/9781501506208_additional%20material.zip)
Supplement: Supplementary file 15 [file Figure 3.3.xlsx]

## Sheet: Figure 3.3
Fifth Avenue Industries (Make-Buy)
	S	P	B1	B2	So	Po	B1o	B2o
	All silk to make	All poly to make	Blend-1 to make	Blend-2 to make	All silk to buy	All poly to buy	Blend-1 to buy	Blend-2 to buy
Number of units	7000	12589.3	16000	6428.57	0	1410.71	0	2071.43
Selling price	6.7	3.55	4.31	4.81	6.7	3.55	4.31	4.81	206445
Labor cost	0.75	0.75	0.75	0.75					31513.4
Material cost	2.5	0.48	0.75	0.81					40750
Outsourcing cost					4.25	2	2.5	2.2	7378.57
Profit	3.45	2.32	2.81	3.25	2.45	1.55	1.81	2.61	126803
Constraints:												Cost/Yd
Yards of silk	0.125								875	<=	1000	20
Yards of polyester		0.08	0.05	0.03					2000	<=	2000	6
Yards of cotton			0.05	0.07					1250	<=	1250	9
All silk demand	1				1				7000	=	7000
All poly demand		1				1			14000	=	14000
Blend-1 demand			1				1		16000	=	16000
Blend-2 demand				1				1	8500	=	8500
									LHS	Sign	RHS
