# Supplementary material
Source: publisher site journal article supplement (https://www.degruyterbrill.com/publication/isbn/9781501506208/downloadAsset/9781501506208_additional%20material.zip)
Supplement: Supplementary file 16 [file Figure 3.4.xlsx]

## Sheet: Figure 3.4
Win Big Gambling Club
	T	N	P	A
	TV spots	Newspaper ads	Prime-time radio spots	Afternoon radio spots
Number of units	1.96875	5	6.2069	0
Audience	5000	8500	2400	2800	67240.3
Constraints:
Maximum TV	1				1.96875	<=	12
Maximum newspaper		1			5	<=	5
Max prime-time radio			1		6.2069	<=	25
Max afternoon radio				1	0	<=	20
Total budget	800	925	290	380	8000	<=	8000
Maximum radio $			290	380	1800	<=	1800
Minimum radio spots			1	1	6.2069	>=	5
					LHS	Sign	RHS
