# Supplementary material
Source: publisher site journal article supplement (https://www.degruyterbrill.com/publication/isbn/9781501506208/downloadAsset/9781501506208_additional%20material.zip)
Supplement: Supplementary file 17 [file Figure 3.5.xlsx]

## Sheet: Figure 3.5
Management Science Associates
	B1	B2	B3	N1	N2	N3
	<= 30 and border	31-50 and border	>= 51 and border	<= 30 and not border	31-50 and not border	>= 51 and not border
Number of households	0	600	140	1000	0	560
Interview cost	7.5	6.8	5.5	6.9	7.25	6.1	15166
Constraints:
Total households	1	1	1	1	1	1	2300	>=	2300
<= 30 households	1			1			1000	>=	1000
31-50 households		1			1		600	>=	600
Border Mexico	1	1	1				740	>=	345
<= 30 and not border				1			1000	>=	500
>= 51 and border			1				140	<=	140
							LHS	Sign	RHS
