# Supplementary material
Source: publisher site journal article supplement (https://www.degruyterbrill.com/publication/isbn/9781501506208/downloadAsset/9781501506208_additional%20material.zip)
Supplement: Supplementary file 18 [file Figure 3.6.xlsx]

## Sheet: Figure 3.6
International City Trust
	T	B	G	P	M	C
	Trade credits	Corp bonds	Gold	Platinum	Mortgages	Const loans
Dollars Invested	1250000	1250000	250000	1250000	500000	500000
Interest	0.07	0.1	0.19	0.12	0.08	0.14	520000
Constraints:
Total funds	1	1	1	1	1	1	5000000	<=	5000000
Max trade credits	1						1250000	<=	1250000
Max corp bonds		1					1250000	<=	1250000
Max gold			1				250000	<=	1250000
Max platinum				1			1250000	<=	1250000
Max mortgages					1		500000	<=	1250000
Max const loans						1	500000	<=	1250000
Risk score	1.7	1.2	3.7	2.4	2	2.9	10000000	<=	10000000
Precious metals			1	1			1500000	>=	1500000
Trade credits & bonds	1	1					2500000	>=	2250000
							LHS	Sign	RHS

## Sheet: Figure 3.7
International City Trust (Alternate Model)
	T	B	G	P	M	C
	Trade credits	Corp bonds	Gold	Platinum	Mortgages	Const loans
Portion Invested	0.25	0.25	0.05	0.25	0.1	0.1
Interest	0.07	0.1	0.19	0.12	0.08	0.14	0.104
Constraints:
Total funds	1	1	1	1	1	1	1	<=	1
Max trade credits	1						0.25	<=	0.25
Max corp bonds		1					0.25	<=	0.25
Max gold			1				0.05	<=	0.25
Max platinum				1			0.25	<=	0.25
Max mortgages					1		0.1	<=	0.25
Max const loans						1	0.1	<=	0.25
Risk score	1.7	1.2	3.7	2.4	2	2.9	2	<=	2
Precious metals			1	1			0.3	>=	0.3
Trade credits & bonds	1	1					0.5	>=	0.45
							LHS	Sign	RHS
