# Supplementary material
Source: publisher site journal article supplement (https://www.degruyterbrill.com/publication/isbn/9781501506208/downloadAsset/9781501506208_additional%20material.zip)
Supplement: Supplementary file 19 [file Figure 3.8.xlsx]

## Sheet: Figure 3.8
Hong Kong Bank
	F	P1	P2	P3	P4	P5
	FT tellers	PT @9am	PT @10am	PT @11am	PT @Noon	PT @1pm
Number of tellers	10	0	7	2	5	0
Cost	90	28	28	28	28	28	1292
Constraints:
9am-10am needs	1	1					10	>=	10
10am-11am needs	1	1	1				17	>=	12
11am-Noon needs	0.5	1	1	1			14	>=	14
Noon-1pm needs	0.5	1	1	1	1		19	>=	16
1pm-2pm needs	1		1	1	1	1	24	>=	18
2pm-3pm needs	1			1	1	1	17	>=	17
3pm-4pm needs	1				1	1	15	>=	15
4pm-5pm needs	1					1	10	>=	10
Max full time	1						10	<=	12
Part-time limit		4	4	4	4	4	56	<=	56
							LHS	Sign	RHS
