# Supplementary material
Source: publisher site journal article supplement (https://www.degruyterbrill.com/publication/isbn/9781501506208/downloadAsset/9781501506208_additional%20material.zip)
Supplement: Supplementary file 20 [file Figure 3.9.xlsx]

## Sheet: Figure 3.9
Goodman Shipping
	W1	W2	W3	W4	W5	W6
	Item 1	Item 2	Item 3	Item 4	Item 5	Item 6
Weight in pounds	3037.38	4500	3000	0	4000	462.617
Load value	3.1	3.2	3.45	4.15	3.25	2.75	48438.1
Constraints:
Weight limit	1	1	1	1	1	1	15000	<=	15000
Volume limit	0.125	0.064	0.144	0.448	0.048	0.018	1300	<=	1300
Item 1 limit (pounds)	1						3037.38	<=	5000
Item 2 limit (pounds)		1					4500	<=	4500
Item 3 limit (pounds)			1				3000	<=	3000
Item 4 limit (pounds)				1			0	<=	3500
Item 5 limit (pounds)					1		4000	<=	4000
Item 6 limit (pounds)						1	462.617	<=	3500
							LHS	Sign	RHS

## Sheet: Figure 3.10
Goodman Shipping (Alternate Model)
	P1	P2	P3	P4	P5	P6
	Item 1	Item 2	Item 3	Item 4	Item 5	Item 6
Proportion	0.607477	1	1	0	1	0.132176
Load value	15500	14400	10350	14525	13000	9625	48438.1
Constraints:
Weight limit	5000	4500	3000	3500	4000	3500	15000	<=	15000
Volume limit	625	288	432	1568	192	63	1300	<=	1300
Item 1 limit	1						0.607477	<=	1
Item 2 limit		1					1	<=	1
Item 3 limit			1				1	<=	1
Item 4 limit				1			0	<=	1
Item 5 limit					1		1	<=	1
Item 6 limit						1	0.132176	<=	1
							LHS	Sign	RHS
