# Supplementary material
Source: publisher site journal article supplement (https://www.degruyterbrill.com/publication/isbn/9781501506208/downloadAsset/9781501506208_additional%20material.zip)
Supplement: Supplementary file 21 [file Figure 4.14.xlsx]

## Sheet: Figure 4.14
Anderson Home Electronics
	M	S	T	B
	MP3 Player	Satellite Radio Tuner	LCD TV	Blu-Ray DVD Player
Solution value	0	380	0	1060
Selling price	70	80	150	110	147000
Cost price	41	48	78	56	77600
Profit	29	32	72	54	69400
Constraints								Cost
Electronic components	3	4	4	3	4700	<=	4700	7
Non-electronic components	2	2	4	3	3940	<=	4500	5
Assembly time	1	1	3	2	2500	<=	2500	10
					LHS	Sign	RHS

## Sheet: Figure 4.15
Microsoft Excel 14.0 Answer Report
Worksheet: [Figure 4.14.xlsx]Anderson Home Electronics
Result: Solver found a solution. All Constraints and optimality conditions are satisfied.
Solver Engine
	Engine: Simplex LP
	Solution Time: 0.016 Seconds.
	Iterations: 3 Subproblems: 0
Solver Options
	Max Time 100 sec, Iterations 100, Precision 0.000001
	Max Subproblems 5000, Max Integer Sols 5000, Integer Tolerance 0.05%, Assume NonNegative
Objective Cell (Max)
	Cell	Name	Original Value	Final Value
	$F$8	Profit	0	69400
Variable Cells
	Cell	Name	Original Value	Final Value	Integer
	$B$5	Solution value MP3 Player	0	0	Contin
	$C$5	Solution value Satellite Radio Tuner	0	380	Contin
	$D$5	Solution value LCD TV	0	0	Contin
	$E$5	Solution value Blu-Ray DVD Player	0	1060	Contin
Constraints
	Cell	Name	Cell Value	Formula	Status	Slack
	$F$10	Electronic components	4700	$F$10<=$H$10	Binding	0
	$F$11	Non-electronic components	3940	$F$11<=$H$11	Not Binding	560
	$F$12	Assembly time	2500	$F$12<=$H$12	Binding	0

## Sheet: Figure 4.16
Microsoft Excel 14.0 Sensitivity Report
Worksheet: [Figure 4.14.xlsx]Anderson Home Electronics
Variable Cells
			Final	Reduced	Objective	Allowable	Allowable
	Cell	Name	Value	Cost	Coefficient	Increase	Decrease
	$B$5	Solution value MP3 Player	0	-1	29	1	1e+30
	$C$5	Solution value Satellite Radio Tuner	380	0	32	40	1.66667
	$D$5	Solution value LCD TV	0	-8	72	8	1e+30
	$E$5	Solution value Blu-Ray DVD Player	1060	0	54	10	5
Constraints
			Final	Shadow	Constraint	Allowable	Allowable
	Cell	Name	Value	Price	R.H. Side	Increase	Decrease
	$F$10	Electronic components	4700	2	4700	2800	950
	$F$11	Non-electronic components	3940	0	4500	1e+30	560
	$F$12	Assembly time	2500	24	2500	466.667	1325
