# Supplementary material
Source: publisher site journal article supplement (https://www.degruyterbrill.com/publication/isbn/9781501506208/downloadAsset/9781501506208_additional%20material.zip)
Supplement: Supplementary file 22 [file Figure 4.17.xlsx]

## Sheet: Figure 4.17
Anderson Home Electronics (Revised)
	M	S	T	B	H
	MP3 Player	Satellite Radio Tuner	LCD TV	Blu-Ray DVD Player	Digitial HTS System
Solution value	0	380	0	1060	0
Selling price	70	80	150	110	175	147000
Cost price	41	48	78	56	95	77600
Profit	29	32	72	54	80	69400
Constraints									Cost
Electronic components	3	4	4	3	5	4700	<=	4700	7
Non-electronic components	2	2	4	3	4	3940	<=	4500	5
Assembly time	1	1	3	2	4	2500	<=	2500	10
						LHS	Sign	RHS

## Sheet: Figure 4.18
Microsoft Excel 14.0 Sensitivity Report
Worksheet: [Figure 4.17.xlsx]Anderson Home Electronics (Revised)
Variable Cells
			Final	Reduced	Objective	Allowable	Allowable
	Cell	Name	Value	Cost	Coefficient	Increase	Decrease
	$B$5	Solution value MP3 Player	0	-1	29	1	1e+30
	$C$5	Solution value Satellite Radio Tuner	380	0	32	40	1.66667
	$D$5	Solution value LCD TV	0	-8	72	8	1e+30
	$E$5	Solution value Blu-Ray DVD Player	1060	0	54	10	5
	$F$5	Solution value Digitial HTS System	0	-26	80	26	1e+30
Constraints
			Final	Shadow	Constraint	Allowable	Allowable
	Cell	Name	Value	Price	R.H. Side	Increase	Decrease
	$G$10	Electronic components	4700	2	4700	2800	950
	$G$11	Non-electronic components	3940	0	4500	1e+30	560
	$G$12	Assembly time	2500	24	2500	466.667	1325
