# Supplementary material
Source: publisher site journal article supplement (https://www.degruyterbrill.com/publication/isbn/9781501506208/downloadAsset/9781501506208_additional%20material.zip)
Supplement: Supplementary file 23 [file Figure 4.19.xlsx]

## Sheet: Figure 4.19
Burn-Off Diet Drink
	A	B	C	D
	Ingr A	Ingr B	Ingr C	Ingr D
Number of ounces	10.25	0	4.125	21.625
Cost	0.4	0.2	0.6	0.3	13.0625
Constraints
Daily dosage minimum	1	1	1	1	36	>=	36
Chemical X requirement	3	4	8	10	280	>=	280
Chemical Y requirement	5	3	6	6	205.75	>=	200
Chemical Z max limit	10	25	20	40	1050	<=	1050
Daily dosage maximum	1	1	1	1	36	<=	40
					LHS	Sign	RHS

## Sheet: Figure 4.20
Microsoft Excel 14.0 Sensitivity Report
Worksheet: [Figure 4.19.xlsx]Burn-Off Diet Drink
Variable Cells
			Final	Reduced	Objective	Allowable	Allowable
	Cell	Name	Value	Cost	Coefficient	Increase	Decrease
	$B$5	Number of ounces Ingr A	10.25	0	0.4	0.0611111	0.25
	$C$5	Number of ounces Ingr B	0	0.06875	0.2	1e+30	0.06875
	$D$5	Number of ounces Ingr C	4.125	0	0.6	1.5	0.0733333
	$E$5	Number of ounces Ingr D	21.625	0	0.3	0.0846154	1e+30
Constraints
			Final	Shadow	Constraint	Allowable	Allowable
	Cell	Name	Value	Price	R.H. Side	Increase	Decrease
	$F$8	Daily dosage minimum	36	0.375	36	16.5	1.27778
	$F$9	Chemical X requirement	280	0.0875	280	41	11
	$F$10	Chemical Y requirement	205.75	0	200	5.75	1e+30
	$F$11	Chemical Z max limit	1050	-0.02375	1050	47.1429	346
	$F$12	Daily dosage maximum	36	0	40	1e+30	4
