# Supplementary material
Source: publisher site journal article supplement (https://www.degruyterbrill.com/publication/isbn/9781501506208/downloadAsset/9781501506208_additional%20material.zip)
Supplement: Supplementary file 24 [file Figure 4.21.xlsx]

## Sheet: Figure 4.21
Hong Kong Bank
	F	P1	P2	P3	P4	P5
	FT tellers	PT @9am	PT @10am	PT @11am	PT @Noon	PT @1pm
Number of tellers	10	0	7	2	5	0
Cost	90	28	28	28	28	28	1292
Constraints:
9am-10am needs	1	1					10	>=	10
10am-11am needs	1	1	1				17	>=	12
11am-Noon needs	0.5	1	1	1			14	>=	14
Noon-1pm needs	0.5	1	1	1	1		19	>=	16
1pm-2pm needs	1		1	1	1	1	24	>=	18
2pm-3pm needs	1			1	1	1	17	>=	17
3pm-4pm needs	1				1	1	15	>=	15
4pm-5pm needs	1					1	10	>=	10
Max full time	1						10	<=	12
Part-time limit		4	4	4	4	4	56	<=	56
							LHS	Sign	RHS

## Sheet: Figure 4.22
Microsoft Excel 14.0 Sensitivity Report
Worksheet: [Figure 4.21.xlsx]Hong Kong Bank
Variable Cells
			Final	Reduced	Objective	Allowable	Allowable
	Cell	Name	Value	Cost	Coefficient	Increase	Decrease
	$B$5	Number of tellers FT tellers	10	0	90	1e+30	48
	$C$5	Number of tellers PT @9am	0	0	28	48	0
	$D$5	Number of tellers PT @10am	7	0	28	0	45
	$E$5	Number of tellers PT @11am	2	0	28	60	0
	$F$5	Number of tellers PT @Noon	5	0	28	0	60
	$G$5	Number of tellers PT @1pm	0	0	28	48	0
Constraints
			Final	Shadow	Constraint	Allowable	Allowable
	Cell	Name	Value	Price	R.H. Side	Increase	Decrease
	$H$8	9am-10am needs	10	0	10	6	0
	$H$9	10am-11am needs	17	0	12	5	1e+30
	$H$10	11am-Noon needs	14	60	14	0	3
	$H$11	Noon-1pm needs	19	0	16	3	1e+30
	$H$12	1pm-2pm needs	24	0	18	6	1e+30
	$H$13	2pm-3pm needs	17	0	17	5	2
	$H$14	3pm-4pm needs	15	60	15	0	3
	$H$15	4pm-5pm needs	10	0	10	3	0
	$H$16	Max full time	10	0	12	1e+30	2
	$H$17	Part-time limit	56	-8	56	60	0
