# Supplementary material
Source: publisher site journal article supplement (https://www.degruyterbrill.com/publication/isbn/9781501506208/downloadAsset/9781501506208_additional%20material.zip)
Supplement: Supplementary file 25 [file Figure 4.9.xlsx]

## Sheet: Figure 4.9
Flair Furniture
	T	C
	Tables	Chairs
Number of units	320	360
Profit	7	5	4040
Constraints:
Carpentry hours	3	4	2400	<=	2400
Painting hours	2	1	1000	<=	1000
Maximum chairs		1	360	<=	450
Minimum tables	1		320	>=	100
			LHS	Sign	RHS

## Sheet: Figure 4.11
Microsoft Excel 14.0 Sensitivity Report
Worksheet: [Figure 4.9.xlsx]Flair Furniture
Variable Cells
			Final	Reduced	Objective	Allowable	Allowable
	Cell	Name	Value	Cost	Coefficient	Increase	Decrease
	$B$5	Number of units Tables	320	0	7	3	3.25
	$C$5	Number of units Chairs	360	0	5	4.33333	1.5
Constraints
			Final	Shadow	Constraint	Allowable	Allowable
	Cell	Name	Value	Price	R.H. Side	Increase	Decrease
	$D$8	Carpentry hours	2400	0.6	2400	225	900
	$D$9	Painting hours	1000	2.6	1000	600	150
	$D$10	Maximum chairs	360	0	450	1e+30	90
	$D$11	Minimum tables	320	0	100	220	1e+30
