# Supplementary material
Source: publisher site journal article supplement (https://www.degruyterbrill.com/publication/isbn/9781501506208/downloadAsset/9781501506208_additional%20material.zip)
Supplement: Supplementary file 26 [file Figure 5.11.xlsx]

## Sheet: Figure 5.11
Fix-It Shop (Assignment)
Assignments:	To
From	Project 1	Project 2	Project 3	Flow out		Capacity
Adams	0	0	1	1	=	1
Brown	0	1	0	1	=	1
Cooper	1	0	0	1	=	1
Flow in	1	1	1	LHS	Sign	RHS
	=	=	=	Sign
Demand	1	1	1	RHS
Unit costs:	To
From	Project 1	Project 2	Project 3
Adams	11	14	6
Brown	8	10	11
Cooper	9	12	7
Total cost =	25
