# Supplementary material
Source: publisher site journal article supplement (https://www.degruyterbrill.com/publication/isbn/9781501506208/downloadAsset/9781501506208_additional%20material.zip)
Supplement: Supplementary file 27 [file Figure 5.14.xlsx]

## Sheet: Figure 5.14
Waukesha Road System (Maximal-Flow)
Flows:	To
From	Node 1	Node 2	Node 3	Node 4	Node 5	Node 6	Flow out		Flow in
Node 1	0	2	2	1	0	0	5	=	5
Node 2	0	0	0	0	0	2	2	=	2
Node 3	0	0	0	0	2	0	2	=	2
Node 4	0	0	0	0	0	1	1	=	1
Node 5	0	0	0	0	0	2	2	=	2
Node 6	5	0	0	0	0	0	5	=	5
Flow in	5	2	2	1	2	5	LHS	Sign	RHS
Capacities:	To
From	Node 1	Node 2	Node 3	Node 4	Node 5	Node 6
Node 1	0	3	10	2	0	0
Node 2	1	0	0	1	0	2
Node 3	0	0	0	3	2	0
Node 4	0	1	1	0	0	1
Node 5	0	0	1	0	0	6
Node 6	1000	2	0	1	0	0
Maximal flow =		5
