# Supplementary material
Source: publisher site journal article supplement (https://www.degruyterbrill.com/publication/isbn/9781501506208/downloadAsset/9781501506208_additional%20material.zip)
Supplement: Supplementary file 28 [file Figure 5.16.xlsx]

## Sheet: Figure 5.16
Ray Design, Inc. (Shortest-Path)
Flows:
From	Node 2	Node 3	Node 4	Node 5	Node 6	Flow out		Capacity
Node 1	1	0				1	=	1
Node 2		1	0	0		1	=	1
Node 3	0			1		1	=	1
Node 4	0			0	0	0	=	0
Node 5	0	0	0		1	1	=	1
Flow in	1	1	0	1	1	LHS	Sign	RHS
					=	Sign
Demand					1	RHS
Distances:
From	Node 2	Node 3	Node 4	Node 5	Node 6
Node 1	100	200
Node 2		50	200	100
Node 3	50			40
Node 4	200			150	100
Node 5	100	40	150		100
Shortest distance =		290
