# Supplementary material
Source: publisher site journal article supplement (https://www.degruyterbrill.com/publication/isbn/9781501506208/downloadAsset/9781501506208_additional%20material.zip)
Supplement: Supplementary file 29 [file Figure 5.22.xlsx]

## Sheet: Figure 5.22
Hardgrave Machine Company (Seattle)
Shipments:	To
From	Detroit	Houston	NY	LA	Flow out		Capacity
Cincinnati	10000	4000	1000	0	15000	=	15000
Kansas City	0	6000	0	0	6000	=	6000
Pittsburgh	0	0	14000	0	14000	=	14000
Seattle	0	2000	0	9000	11000	=	11000
Flow in	10000	12000	15000	9000	LHS	Sign	RHS
	=	=	=	=	Sign
Demand	10000	12000	15000	9000	RHS
Unit costs:	To
From	Detroit	Houston	NY	LA
Cincinnati	73	103	88	108
Kansas City	85	80	100	90
Pittsburgh	88	97	78	118
Seattle	113	91	118	80
Total cost =	3704000

## Sheet: Figure 5.23
Hardgrave Machine Company (Birmingham)
Shipments:	To
From	Detroit	Houston	NY	LA	Flow out		Capacity
Cincinnati	10000	0	1000	4000	15000	=	15000
Kansas City	0	1000	0	5000	6000	=	6000
Pittsburgh	0	0	14000	0	14000	=	14000
Birmingham	0	11000	0	0	11000	=	11000
Flow in	10000	12000	15000	9000	LHS	Sign	RHS
	=	=	=	=	Sign
Demand	10000	12000	15000	9000	RHS
Unit costs:	To
From	Detroit	Houston	NY	LA
Cincinnati	73	103	88	108
Kansas City	85	80	100	90
Pittsburgh	88	97	78	118
Birmingham	84	79	90	99
Total cost =	3741000
