# Supplementary material
Source: publisher site journal article supplement (https://www.degruyterbrill.com/publication/isbn/9781501506208/downloadAsset/9781501506208_additional%20material.zip)
Supplement: Supplementary file 30 [file Figure 5.24.xlsx]

## Sheet: Figure 5.24
Seccombe, Inc. (Assignment)
Assignments:	Office
Hiree	Omaha	Miami	Dallas	New York	Flow out		Capacity
Jones	0	1	0	0	1	=	1
Smith	0	0	0	1	1	=	1
Wilson	1	0	0	0	1	=	1
Flow in	1	1	0	1	LHS	Sign	RHS
	<=	<=	<=	<=	Sign
Demand	1	1	1	1	RHS
Unit costs:	Office
Hiree	Omaha	Miami	Dallas	New York
Jones	800	1100	1200	1000
Smith	500	1600	1300	800
Wilson	500	1000	2300	1500
Total cost =	2400
