# Supplementary material
Source: publisher site journal article supplement (https://www.degruyterbrill.com/publication/isbn/9781501506208/downloadAsset/9781501506208_additional%20material.zip)
Supplement: Supplementary file 31 [file Figure 5.27.xlsx]

## Sheet: Figure 5.27
PetroChem (Maximal-Flow)
Flows:	To
From	Node 1	Node 2	Node 3	Node 4	Node 5	Node 6	Node 7	Flow out		Flow in
Node 1	0	4	1	0	5	0	0	10	=	10
Node 2	0	0	0	3	1	0	0	4	=	4
Node 3	0	0	0	0	0	1	0	1	=	1
Node 4	0	0	0	0	0	0	3	3	=	3
Node 5	0	0	0	0	0	1	5	6	=	6
Node 6	0	0	0	0	0	0	2	2	=	2
Node 7	10	0	0	0	0	0	0	10	=	10
Flow in	10	4	1	3	6	2	10	LHS	Sign	RHS
Capacities:	To
From	Node 1	Node 2	Node 3	Node 4	Node 5	Node 6	Node 7
Node 1	0	4	8	0	5	0	0
Node 2	0	0	0	3	3	0	0
Node 3	0	0	0	0	3	1	0
Node 4	0	3	0	0	3	0	4
Node 5	1	0	2	0	0	1	5
Node 6	0	0	1	0	4	0	6
Node 7	1000	0	0	2	1	0	0
Maximal flow =		10
