# Supplementary material
Source: publisher site journal article supplement (https://www.degruyterbrill.com/publication/isbn/9781501506208/downloadAsset/9781501506208_additional%20material.zip)
Supplement: Supplementary file 32 [file Figure 5.29.xlsx]

## Sheet: Figure 5.29
Leadville Tom (Shortest-Path)
Flows:
From	N 2	N 3	N 4	N 5	N 6	N 7	N 8	N 9	N 10	N 11	N 12	N 13	N 14	Flow out		Capacity
Node 1	0	1	0	0	0	0	0	0	0	0	0	0	0	1	=	1
Node 2	0	0	0	0	0	0	0	0	0	0	0	0	0	0	=	0
Node 3	0	0	0	0	1	0	0	0	0	0	0	0	0	1	=	1
Node 4	0	0	0	0	0	0	0	0	0	0	0	0	0	0	=	0
Node 5	0	0	0	0	0	0	0	0	0	0	0	0	0	0	=	0
Node 6	0	0	0	0	0	0	0	1	0	0	0	0	0	1	=	1
Node 7	0	0	0	0	0	0	0	0	0	0	0	0	0	0	=	0
Node 8	0	0	0	0	0	0	0	0	0	0	0	0	0	0	=	0
Node 9	0	0	0	0	0	0	0	0	0	0	1	0	0	1	=	1
Node 10	0	0	0	0	0	0	0	0	0	0	0	0	0	0	=	0
Node 11	0	0	0	0	0	0	0	0	0	0	0	0	0	0	=	0
Node 12	0	0	0	0	0	0	0	0	0	0	0	0	1	1	=	1
Node 13	0	0	0	0	0	0	0	0	0	0	0	0	0	0	=	0
Flow in	0	1	0	0	1	0	0	1	0	0	1	0	1	LHS	Sign	RHS
													=	Sign
Demand													1	RHS
Distances:
From	N 2	N 3	N 4	N 5	N 6	N 7	N 8	N 9	N 10	N 11	N 12	N 13	N 14
Node 1	100	90	105	1000	1000	1000	1000	1000	1000	1000	1000	1000	1000
Node 2	1000	1000	1000	90	1000	1000	1000	1000	1000	1000	1000	1000	1000
Node 3	1000	1000	1000	1000	100	1000	1000	1000	1000	1000	1000	1000	1000
Node 4	1000	1000	1000	1000	1000	100	1000	1000	1000	1000	350	1000	1000
Node 5	90	1000	1000	1000	1000	1000	100	1000	1000	1000	1000	1000	1000
Node 6	1000	100	1000	1000	1000	1000	1000	90	1000	1000	1000	1000	1000
Node 7	1000	1000	100	1000	1000	1000	1000	1000	90	1000	1000	1000	1000
Node 8	1000	1000	1000	100	1000	1000	1000	1000	1000	90	1000	1000	1000
Node 9	1000	1000	1000	1000	90	1000	1000	1000	1000	1000	90	1000	1000
Node 10	1000	1000	1000	1000	1000	90	1000	1000	1000	1000	1000	90	1000
Node 11	1000	1000	1000	1000	1000	1000	90	1000	1000	1000	1000	1000	100
Node 12	1000	1000	350	1000	1000	1000	1000	90	1000	1000	1000	1000	90
Node 13	1000	1000	1000	1000	1000	1000	1000	1000	90	1000	1000	1000	100
Shortest distance =			460
