# Supplementary material
Source: publisher site journal article supplement (https://www.degruyterbrill.com/publication/isbn/9781501506208/downloadAsset/9781501506208_additional%20material.zip)
Supplement: Supplementary file 33 [file Figure 5.4.xlsx]

## Sheet: Figure 5.4
Executive Furniture (Transportation)
Shipments:	To
From	Albuquerque	Boston	Cleveland	Flow out		Capacity
Des Moines	100	0	0	100	=	100
Evansville	0	200	100	300	=	300
Fort Lauderdale	200	0	100	300	=	300
Flow in	300	200	200	LHS	Sign	RHS
	=	=	=	Sign
Demand	300	200	200	RHS
Unit costs:	To
From	Albuquerque	Boston	Cleveland
Des Moines	5	4	3
Evansville	8	4	3
Fort Lauderdale	9	7	5
Total cost =	3900

## Sheet: Figure 5.5
Executive Furniture (Transportation)
Shipments:	To
From	Albuquerque	Boston	Cleveland	Flow out		Capacity
Des Moines	100	0	0	100	=	100
Evansville	0	200	100	300	=	300
Fort Lauderdale	200	0	100	300	=	300
Flow in	300	200	200	LHS	Sign	RHS
	=	=	=	Sign
Demand	300	200	200	RHS
Unit costs:	To
From	Albuquerque	Boston	Cleveland
Des Moines	5	4	3
Evansville	8	4	3
Fort Lauderdale	9	7	5
Total cost =	3900
