# Supplementary material
Source: publisher site journal article supplement (https://www.degruyterbrill.com/publication/isbn/9781501506208/downloadAsset/9781501506208_additional%20material.zip)
Supplement: Supplementary file 34 [file Figure 5.6.xlsx]

## Sheet: Figure 5.6
Executive Furniture (Min-Max)
Shipments:	To
From	Albuquerque	Boston	Cleveland	Flow out		Capacity
Des Moines	100	0	0	100	=	100
Evansville	97.5	102.5	100	300	=	300
Fort Lauderdale	102.5	97.5	100	300	=	300
Flow in	300	200	200	LHS	Sign	RHS
	=	=	=	Sign
Demand	300	200	200	RHS
Unit costs:	To
From	Albuquerque	Boston	Cleveland
Des Moines	5	4	3
Evansville	8	4	3
Fort Lauderdale	9	7	5
Min-Max flow =	102.5
Other constraints
Total cost	4095	<=	4095
Min-Max	All routes	<=	OF Value
	LHS	Sign	RHS
