# Supplementary material
Source: publisher site journal article supplement (https://www.degruyterbrill.com/publication/isbn/9781501506208/downloadAsset/9781501506208_additional%20material.zip)
Supplement: Supplementary file 35 [file Figure 5.7.xlsx]

## Sheet: Figure 5.7
Executive Furniture (Transshipment)
Shipments:	To
From	Albuquerque	Boston	Cleveland	Evansville	Flow out		Capacity
Des Moines	0	0	100	0	100	=	100
Evansville	300	200	100	0	600	=	600
Fort Lauderdale	0	0	0	300	300	=	300
Flow in	300	200	200	300	LHS	Sign	RHS
	=	=	=		Sign
Demand	300	200	200		RHS
Unit costs:	To
From	Albuquerque	Boston	Cleveland	Evansville
Des Moines	5	4	3	2
Evansville	3	2	1	0
Fort Lauderdale	9	7	5	3
Total cost =	2600
