# Supplementary material
Source: publisher site journal article supplement (https://www.degruyterbrill.com/publication/isbn/9781501506208/downloadAsset/9781501506208_additional%20material.zip)
Supplement: Supplementary file 36 [file Figure 5.9.xlsx]

## Sheet: Figure 5.9
Lopez Custom Outfits (Transshipment)
Shipments:	To
From	Charlotte	Richmond	Dallas	Louisville	Memphis	Nashville	Flow out		Capacity
Albany	450	0	0	0	0	0	450	<=	450
Boston	250	250	0	0	0	0	500	<=	500
Hartford	0	475	0	0	0	0	475	<=	580
Charlotte	0	0	0	300	0	400	700	=	700
Richmond	0	0	450	0	275	0	725	=	725
Flow in	700	725	450	300	275	400	LHS	Sign	RHS
			=	=	=	=	Sign
Demand			450	300	275	400	RHS
Unit costs:	To
From	Charlotte	Richmond	Dallas	Louisville	Memphis	Nashville
Albany	40	55	2000	2000	2000	2000
Boston	43	46	2000	2000	2000	2000
Hartford	50	50	2000	2000	2000	2000
Charlotte	2000	2000	38	40	51	40
Richmond	2000	2000	30	47	41	45
Total cost =	116775
