# Supplementary material
Source: publisher site journal article supplement (https://www.degruyterbrill.com/publication/isbn/9781501506208/downloadAsset/9781501506208_additional%20material.zip)
Supplement: Supplementary file 37 [file Figure 6.11.xlsx]

## Sheet: Figure 6.11
Wilson Doors (Rank R1 Goals Only)
	E	I	C	dT-	dT+	dS-	dE-	dE+	dI-	dI+	dC-	dC+
	Exterior doors	Interior doors	Comm doors	Under ach total sales	Over ach total sales	Under ach steel usage	Under ach exter doors	Over ach exter doors	Under ach inter doors	Over ach inter doors	Under ach comm doors	Over ach comm doors
Solution value	1000	800	200	0	0	1200	0	0	0	28000	13000	0
Objective coeff				1									0
Constraints:																Achieved
Total sales goal	70	110	110	1	-1								180000	=	180000	180000
Steel usage goal	4	3	7			1							9000	=	9000	7800
Exterior doors goal	70						1	-1					70000	=	70000	70000
Interior doors goal		110							1	-1			60000	=	60000	88000
Comm doors goal			110								1	-1	35000	=	35000	22000
Forming time	2	4	3										5800	<=	6000
Assembly time	2	3	4										5200	<=	5200
													LHS	Sign	RHS

## Sheet: Figure 6.12
Wilson Doors (Rank R2 Goals Only)
	E	I	C	dT-	dT+	dS-	dE-	dE+	dI-	dI+	dC-	dC+
	Exterior doors	Interior doors	Comm doors	Under ach total sales	Over ach total sales	Under ach steel usage	Under ach exter doors	Over ach exter doors	Under ach inter doors	Over ach inter doors	Under ach comm doors	Over ach comm doors
Solution value	1900	466.667	0	0	4333.33	0	0	63000	8666.67	0	35000	0
Objective coeff						1							0
Constraints:																Achieved
Total sales goal	70	110	110	1	-1								180000	=	180000	184333
Steel usage goal	4	3	7			1							9000	=	9000	9000
Exterior doors goal	70						1	-1					70000	=	70000	133000
Interior doors goal		110							1	-1			60000	=	60000	51333.3
Comm doors goal			110								1	-1	35000	=	35000	0
Forming time	2	4	3										5666.67	<=	6000
Assembly time	2	3	4										5200	<=	5200
													LHS	Sign	RHS

## Sheet: Figure 6.12 IP
Wilson Doors (Rank R2 Goals Only - IP)
	E	I	C	dT-	dT+	dS-	dE-	dE+	dI-	dI+	dC-	dC+
	Exterior doors	Interior doors	Comm doors	Under ach total sales	Over ach total sales	Under ach steel usage	Under ach exter doors	Over ach exter doors	Under ach inter doors	Over ach inter doors	Under ach comm doors	Over ach comm doors
Solution value	1699	422	134	0	90	0	0	48930	13580	0	20260	0
Objective coeff						1							0
Constraints:																Achieved
Total sales goal	70	110	110	1	-1								180000	=	180000	180090
Steel usage goal	4	3	7			1							9000	=	9000	9000
Exterior doors goal	70						1	-1					70000	=	70000	118930
Interior doors goal		110							1	-1			60000	=	60000	46420
Comm doors goal			110								1	-1	35000	=	35000	14740
Forming time	2	4	3										5488	<=	6000
Assembly time	2	3	4										5200	<=	5200
													LHS	Sign	RHS

## Sheet: Figure 6.13
Wilson Doors (Rank R3 Goals Only)
	E	I	C	dT-	dT+	dS-	dE-	dE+	dI-	dI+	dC-	dC+
	Exterior doors	Interior doors	Comm doors	Under ach total sales	Over ach total sales	Under ach steel usage	Under ach exter doors	Over ach exter doors	Under ach inter doors	Over ach inter doors	Under ach comm doors	Over ach comm doors
Solution value	1694.74	421.053	136.842	0	0	0	0	48631.6	13684.2	0	19947.4	0
Objective coeff							1		1		1		33631.6
Constraints:																Achieved
Total sales goal	70	110	110	1	-1								180000	=	180000	180000
Steel usage goal	4	3	7			1							9000	=	9000	9000
Exterior doors goal	70						1	-1					70000	=	70000	118632
Interior doors goal		110							1	-1			60000	=	60000	46315.8
Comm doors goal			110								1	-1	35000	=	35000	15052.6
Forming time	2	4	3										5484.21	<=	6000
Assembly time	2	3	4										5200	<=	5200
													LHS	Sign	RHS

## Sheet: Figure 6.13 IP
Wilson Doors (Rank R3 Goals Only - IP)
	E	I	C	dT-	dT+	dS-	dE-	dE+	dI-	dI+	dC-	dC+
	Exterior doors	Interior doors	Comm doors	Under ach total sales	Over ach total sales	Under ach steel usage	Under ach exter doors	Over ach exter doors	Under ach inter doors	Over ach inter doors	Under ach comm doors	Over ach comm doors
Solution value	1699	422	134	0	90	0	0	48930	13580	0	20260	0
Objective coeff							1		1		1		33840
Constraints:																Achieved
Total sales goal	70	110	110	1	-1								180000	=	180000	180090
Steel usage goal	4	3	7			1							9000	=	9000	9000
Exterior doors goal	70						1	-1					70000	=	70000	118930
Interior doors goal		110							1	-1			60000	=	60000	46420
Comm doors goal			110								1	-1	35000	=	35000	14740
Forming time	2	4	3										5488	<=	6000
Assembly time	2	3	4										5200	<=	5200
													LHS	Sign	RHS
