# Supplementary material
Source: publisher site journal article supplement (https://www.degruyterbrill.com/publication/isbn/9781501506208/downloadAsset/9781501506208_additional%20material.zip)
Supplement: Supplementary file 38 [file Figure 6.16.xlsx]

## Sheet: Figure 6.16
Pickens Memorial Hospital (NLP)
	M	S	P
	Medical	Surgical	Pediatric
Number of patients
	M	S	P	M2	S2	P2	MS	MP
Variable terms	0	0	0	0	0	0	0	0
Profit	45	70	60	2	3	3	2		0
Constraints:
Total patients	1	1	1						0	<=	200
X-ray capacity	1	3	1						0	<=	560
Marketing budget	3	5	3.5						0	<=	1000
Lab hours	0.6	0.6	0.6	0.003			0.003	0.003	0	<=	140
									LHS	Sign	RHS

## Sheet: Figure 6.17
Pickens Memorial Hospital (NLP Solution #1)
	M	S	P
	Medical	Surgical	Pediatric
Number of patients	20	180	0
	M	S	P	M2	S2	P2	MS	MP
Variable terms	20	180	0	400	32400	0	3600	0
Profit	45	70	60	2	3	3	2		118700
Constraints:
Total patients	1	1	1						200	<=	200
X-ray capacity	1	3	1						560	<=	560
Marketing budget	3	5	3.5						960	<=	1000
Lab hours	0.6	0.6	0.6	0.003			0.003	0.003	132	<=	140
									LHS	Sign	RHS

## Sheet: Figure 6.18
Pickens Memorial Hospital (NLP Solution #2)
	M	S	P
	Medical	Surgical	Pediatric
Number of patients	0	0	200
	M	S	P	M2	S2	P2	MS	MP
Variable terms	0	0	200	0	0	40000	0	0
Profit	45	70	60	2	3	3	2		132000
Constraints:
Total patients	1	1	1						200	<=	200
X-ray capacity	1	3	1						200	<=	560
Marketing budget	3	5	3.5						700	<=	1000
Lab hours	0.6	0.6	0.6	0.003			0.003	0.003	120	<=	140
									LHS	Sign	RHS
