# Supplementary material
Source: publisher site journal article supplement (https://www.degruyterbrill.com/publication/isbn/9781501506208/downloadAsset/9781501506208_additional%20material.zip)
Supplement: Supplementary file 39 [file Figure 6.2.xlsx]

## Sheet: Figure 6.2
Harrison Electric (General Integer)
	L	F
	Lamps	Fans
Number of units	3	2
Profit	600	700	3200
Constraints:
Wiring hours	2	3	12	<=	12
Assembly hours	6	5	28	<=	30
			LHS	Sign	RHS
