# Supplementary material
Source: publisher site journal article supplement (https://www.degruyterbrill.com/publication/isbn/9781501506208/downloadAsset/9781501506208_additional%20material.zip)
Supplement: Supplementary file 40 [file Figure 6.20.xlsx]

## Sheet: Figure 6.20
Solved Problem 6-1 (Binary)
	X1	X2	X3
Solution value	1	1	0
Objective coeff	50	45	48	95
Constraints:
Constraint 1	19	27	34	46	<=	80
Constraint 2	22	13	12	35	<=	40
Constraint 3	1	1	1	2	<=	2
Constraint 4	1	-1		0	=	0
				LHS	Sign	RHS
