# Supplementary material
Source: publisher site journal article supplement (https://www.degruyterbrill.com/publication/isbn/9781501506208/downloadAsset/9781501506208_additional%20material.zip)
Supplement: Supplementary file 41 [file Figure 6.21.xlsx]

## Sheet: Figure 6.21
Harrison Electric (Rank R1 Goals Only)
	L	F	d1-	d1+	d2-	d2+	d3-	d3+	d4-	d4+	d5-	d5+
	Lamps	Fans	Under ach lamps	Over ach lamps	Under ach fans	Over ach fans	Under ach wiring	Over ach wiring	Under ach asmbly	Over ach asmbly	Under ach profit	Over ach profit
Solution value	4	140	0	0	0	137	0	410	0	684	0	401
Obj coeff			1		1								0
Constraints:																Achieved
Lamps goal	1		1	-1									4	=	4	4
Fans goal		1			1	-1							3	=	3	140
Wiring goal	2	3					1	-1					18	=	18	428
Assembly goal	6	5							1	-1			40	=	40	724
Profit goal	600	700									1	-1	99999	=	99999	100400
													LHS	Sign	RHS

## Sheet: Figure 6.22
Harrison Electric (Rank R2 Goals Only)
	L	F	d1-	d1+	d2-	d2+	d3-	d3+	d4-	d4+	d5-	d5+
	Lamps	Fans	Under ach lamps	Over ach lamps	Under ach fans	Over ach fans	Under ach wiring	Over ach wiring	Under ach asmbly	Over ach asmbly	Under ach profit	Over ach profit
Solution value	4	3	0	0	9.74461e-11	0	1	0	1	0	95499	0
Obj coeff								1		1			0
Constraints:																Achieved
Lamps goal	1		1	-1									4	=	4	4
Fans goal		1			1	-1							3	=	3	3
Wiring goal	2	3					1	-1					18	=	18	17
Assembly goal	6	5							1	-1			40	=	40	39
Profit goal	600	700									1	-1	99999	=	99999	4500
													LHS	Sign	RHS

## Sheet: Figure 6.23
Harrison Electric (Rank R3 Goals Only)
	L	F	d1-	d1+	d2-	d2+	d3-	d3+	d4-	d4+	d5-	d5+
	Lamps	Fans	Under ach lamps	Over ach lamps	Under ach fans	Over ach fans	Under ach wiring	Over ach wiring	Under ach asmbly	Over ach asmbly	Under ach profit	Over ach profit
Solution value	4	3	0	0	0	0	1	0	1	0	95499	0
Obj coeff											1		95499
Constraints:																Achieved
Lamps goal	1		1	-1									4	=	4	4
Fans goal		1			1	-1							3	=	3	3
Wiring goal	2	3					1	-1					18	=	18	17
Assembly goal	6	5							1	-1			40	=	40	39
Profit goal	600	700									1	-1	99999	=	99999	4500
													LHS	Sign	RHS
