# Supplementary material
Source: publisher site journal article supplement (https://www.degruyterbrill.com/publication/isbn/9781501506208/downloadAsset/9781501506208_additional%20material.zip)
Supplement: Supplementary file 42 [file Figure 6.24.xlsx]

## Sheet: Figure 6.24
Thermolock (NLP Solution)
	R	O
	Rubber	Oil
Number of pounds	3.32533	14.6723
	R	O	R2	O2	R3
Variable terms	3.32533	14.6723	11.0578	215.276	36.7708
Cost	5	7				119.333
Constraints:
Hardness	3	4	0.25	0.3		136.012	>=	125
Tensile strength	13				1	80	>=	80
Elasticity	0.7	1				17	>=	17
						LHS	Sign	RHS

## Sheet: Figure 6.24 Alt
Thermolock (NLP Solution #2)
	R	O
	Rubber	Oil
Number of pounds	10	10
	R	O	R2	O2	R3
Variable terms	10	10	100	100	1000
Cost	5	7				120
Constraints:
Hardness	3	4	0.25	0.3		125	>=	125
Tensile strength	13				1	1130	>=	80
Elasticity	0.7	1				17	>=	17
						LHS	Sign	RHS
