# Supplementary material
Source: publisher site journal article supplement (https://www.degruyterbrill.com/publication/isbn/9781501506208/downloadAsset/9781501506208_additional%20material.zip)
Supplement: Supplementary file 43 [file Figure 6.5.xlsx]

## Sheet: Figure 6.5
Simkin and Steinberg (Binary)
	T	B	D	H	L	S	C
	Trans-Texas Oil	British Petro	Dutch Shell	Houston Oil	Lone Star Petro	San Diego Oil	Calif Petro
Invest? (1 = Yes, 0 = No)	0	0	1	1	1	1	0
Exp annual return ('000)	50	80	90	120	110	40	75	360
Constraints:
Investment limit	480	540	680	1000	700	510	900	2890	<=	3000
Foreign companies		1	1					1	<=	1
British & Trans-Texas		1						0	<=	0
Texas companies	1			1	1			2	>=	2
California companies						1	1	1	=	1
								LHS	Sign	RHS
