# Supplementary material
Source: publisher site journal article supplement (https://www.degruyterbrill.com/publication/isbn/9781501506208/downloadAsset/9781501506208_additional%20material.zip)
Supplement: Supplementary file 44 [file Figure 6.6.xlsx]

## Sheet: Figure 6.6
Sussex County (Set Covering)
	A	B	C	D	E	F	G
	Comm A	Comm B	Comm C	Comm D	Comm E	Comm F	Comm G
Locate? (1 = Yes, 0 = No)	0	1	0	1	1	0	0
Objective function coeff	1	1	1	1	1	1	1	3
Constraints:
Community A served?	1	1	1					1	>=	1
Community B served?	1	1		1				2	>=	1
Community C served?	1		1	1			1	1	>=	1
Community D served?		1	1	1		1	1	2	>=	1
Community E served?					1	1		1	>=	1
Community F served?				1	1	1		2	>=	1
Community G served?			1	1			1	1	>=	1
								LHS	Sign	RHS
