# Supplementary material
Source: publisher site journal article supplement (https://www.degruyterbrill.com/publication/isbn/9781501506208/downloadAsset/9781501506208_additional%20material.zip)
Supplement: Supplementary file 45 [file Figure 6.7.xlsx]

## Sheet: Figure 6.7
Hardgrave Machine Company (Fixed Charge)
Shipments:	To
From	Detroit	Houston	NY	LA	Flow out		Capacity
Cincinnati					0	=	15000
Kansas City					0	=	6000
Pittsburgh					0	=	14000
Birmingham					0	=	0
Seattle					0	=	0
Flow in	0	0	0	0	LHS	Sign	RHS
	=	=	=	=	Sign
Demand	10000	12000	15000	9000	RHS
Unit costs:	To
From	Detroit	Houston	NY	LA
Cincinnati	73	103	88	108
Kansas City	85	80	100	90
Pittsburgh	88	97	78	118
Birmingham	84	79	90	99
Seattle	113	91	118	80
	Birmingham	Seattle	No. of new Plants		Required New Plants
Build? (1=Yes, 0=No)			0	=	1
Fixed cost	325000	400000	LHS	Sign	RHS
Shipping cost =	0
Fixed cost =	0
Total cost =	0

## Sheet: Figure 6.8
Hardgrave Machine Company (Fixed Charge)
Shipments:	To
From	Detroit	Houston	NY	LA	Flow out		Capacity
Cincinnati	10000	0	1000	4000	15000	=	15000
Kansas City	0	1000	0	5000	6000	=	6000
Pittsburgh	0	0	14000	0	14000	=	14000
Birmingham	0	11000	0	0	11000	=	11000
Seattle	0	0	0	1.81899e-12	1.81899e-12	=	0
Flow in	10000	12000	15000	9000	LHS	Sign	RHS
	=	=	=	=	Sign
Demand	10000	12000	15000	9000	RHS
Unit costs:	To
From	Detroit	Houston	NY	LA
Cincinnati	73	103	88	108
Kansas City	85	80	100	90
Pittsburgh	88	97	78	118
Birmingham	84	79	90	99
Seattle	113	91	118	80
	Birmingham	Seattle	No. of new Plants		Required New Plants
Build? (1=Yes, 0=No)	1	0	1	=	1
Fixed cost	325000	400000	LHS	Sign	RHS
Shipping cost =	3741000
Fixed cost =	325000
Total cost =	4066000
