# Supplementary material
Source: publisher site journal article supplement (https://www.degruyterbrill.com/publication/isbn/9781501506208/downloadAsset/9781501506208_additional%20material.zip)
Supplement: Supplementary file 46 [file Figure 6.9.xlsx]

## Sheet: LP
Wilson Doors (LP)
	E	I	C
	Exterior doors	Interior doors	Comm doors
Number of units	1400	800	0
Revenue	70	110	110	186000
Constraints:
Steel usage	4	3	7	8000	<=	9000
Forming time	2	4	3	6000	<=	6000
Assembly time	2	3	4	5200	<=	5200
				LHS	Sign	RHS

## Sheet: Figure 6.9
Wilson Doors (Weighted GP #1)
	E	I	C	dT-	dT+	dE-	dE+	dI-	dI+	dC-	dC+
	Exterior doors	Interior doors	Comm doors	Under ach total sales	Over ach total sales	Under ach exter doors	Over ach exter doors	Under ach inter doors	Over ach inter doors	Under ach comm doors	Over ach comm doors
Solution value	1000	800	200	0	0	0	0	0	28000	13000	0
Goal weights				5		1		1		1		13000
Constraints:															Achieved
Total sales goal	70	110	110	1	-1							180000	=	180000	180000
Exterior doors goal	70					1	-1					70000	=	70000	70000
Interior doors goal		110						1	-1			60000	=	60000	88000
Comm doors goal			110							1	-1	35000	=	35000	22000
Steel usage	4	3	7									7800	<=	9000
Forming time	2	4	3									5800	<=	6000
Assembly time	2	3	4									5200	<=	5200
												LHS	Sign	RHS

## Sheet: Figure 6.10
Wilson Doors (Weighted GP #2)
	E	I	C	dT-	dT+	dE-	dE+	dI-	dI+	dC-	dC+
	Exterior doors	Interior doors	Comm doors	Under ach total sales	Over ach total sales	Under ach exter doors	Over ach exter doors	Under ach inter doors	Over ach inter doors	Under ach comm doors	Over ach comm doors
Solution value	1000	642.424	318.182	4333.33	0	0	0	0	10666.7	0	0
Goal weights				2.5		1		1		1		10833.3
Constraints:															Achieved
Total sales goal	70	110	110	1	-1							180000	=	180000	175667
Exterior doors goal	70					1	-1					70000	=	70000	70000
Interior doors goal		110						1	-1			60000	=	60000	70666.7
Comm doors goal			110							1	-1	35000	=	35000	35000
Steel usage	4	3	7									8154.55	<=	9000
Forming time	2	4	3									5524.24	<=	6000
Assembly time	2	3	4									5200	<=	5200
												LHS	Sign	RHS

## Sheet: Figure 6.10 IP
Wilson Doors (Weighted GP #2 - IP)
	E	I	C	dT-	dT+	dE-	dE+	dI-	dI+	dC-	dC+
	Exterior doors	Interior doors	Comm doors	Under ach total sales	Over ach total sales	Under ach exter doors	Over ach exter doors	Under ach inter doors	Over ach inter doors	Under ach comm doors	Over ach comm doors
Solution value	1000	644	317	4290	0	0	0	0	10840	130	0
Goal weights				2.5		1		1		1		10855
Constraints:															Achieved
Total sales goal	70	110	110	1	-1							180000	=	180000	175710
Exterior doors goal	70					1	-1					70000	=	70000	70000
Interior doors goal		110						1	-1			60000	=	60000	70840
Comm doors goal			110							1	-1	35000	=	35000	34870
Steel usage	4	3	7									8151	<=	9000
Forming time	2	4	3									5527	<=	6000
Assembly time	2	3	4									5200	<=	5200
												LHS	Sign	RHS
