# Supplementary material
Source: publisher site journal article supplement (https://www.degruyterbrill.com/publication/isbn/9781501506208/downloadAsset/9781501506208_additional%20material.zip)
Supplement: Supplementary file 47 [file Figure 7.13.xlsx]

## Sheet: Figure 7.13
PERT Time Estimates (in Weeks) for General Foundry
Activity	Description	Optimistic time (a)	Most likely time (m)	Pessimistic time (b)	Expected time	Variance	Standard deviation
A	Build internal components	1	2	3	2	0.111111	0.333333
B	Modify roof and floor	2	3	4	3	0.111111	0.333333
C	Construct collection stack	1	2	3	2	0.111111	0.333333
D	Pour concrete and install frame	2	4	6	4	0.444444	0.666667
E	Build high-temperature burner	1	4	7	4	1	1
F	Install pollution control system	1	2	9	3	1.77778	1.33333
G	Install air pollution device	3	4	11	5	1.77778	1.33333
H	Inspect and test	1	2	3	2	0.111111	0.333333
