# Supplementary material
Source: publisher site journal article supplement (https://www.degruyterbrill.com/publication/isbn/9781501506208/downloadAsset/9781501506208_additional%20material.zip)
Supplement: Supplementary file 48 [file Figure 7.17.xlsx]

## Sheet: Figure 7.17
Budgeted Costs (in Thousands) for General Foundry, Using EST
Activity	WEEK															Total Cost
	1	2	3	4	5	6	7	8	9	10	11	12	13	14	15
A	11	11														22
B	10	10	10													30
C			13	13												26
D				12	12	12	12									48
E					14	14	14	14								56
F					10	10	10									30
G									16	16	16	16	16			80
H														8	8	16
																308
Total per week	21	21	23	25	36	36	36	14	16	16	16	16	16	8	8
Total to date	21	42	65	90	126	162	198	212	228	244	260	276	292	300	308
