# Supplementary material
Source: publisher site journal article supplement (https://www.degruyterbrill.com/publication/isbn/9781501506208/downloadAsset/9781501506208_additional%20material.zip)
Supplement: Supplementary file 49 [file Figure 7.18.xlsx]

## Sheet: Figure 7.18
Budgeted Costs (in Thousands) for General Foundry, Using LST
Activity	WEEK															Total Cost
	1	2	3	4	5	6	7	8	9	10	11	12	13	14	15
A	11	11														22
B		10	10	10												30
C			13	13												26
D					12	12	12	12								48
E					14	14	14	14								56
F											10	10	10			30
G									16	16	16	16	16			80
H														8	8	16
																308
Total per week	11	21	23	23	26	26	26	26	16	16	26	26	26	8	8
Total to date	11	32	55	78	104	130	156	182	198	214	240	266	292	300	308
