# Supplementary material
Source: publisher site journal article supplement (https://www.degruyterbrill.com/publication/isbn/9781501506208/downloadAsset/9781501506208_additional%20material.zip)
Supplement: Supplementary file 50 [file Figure 7.20.xlsx]

## Sheet: Figure 7.20
Monitoring and Controlling Budgeted Costs for General Foundry
Activity	Total Budgted Cost	Percentage Completed	Value of Work Completed	Actual Cost	Activity Difference
A	22000	1	22000	20000	-2000
B	30000	1	30000	36000	6000
C	26000	1	26000	26000	0
D	48000	0.1	4800	6000	1200
E	56000	0.2	11200	20000	8800
F	30000	0.2	6000	4000	-2000
G	80000	0	0	0	0
H	16000	0	0	0	0
		Total =	100000	112000	12000
