# Supplementary material
Source: publisher site journal article supplement (https://www.degruyterbrill.com/publication/isbn/9781501506208/downloadAsset/9781501506208_additional%20material.zip)
Supplement: Supplementary file 51 [file Figure 7.21.xlsx]

## Sheet: Figure 7.21
Support Staff Requirements for General Foundry, Using EST
Activity	WEEK															Total Staff
	1	2	3	4	5	6	7	8	9	10	11	12	13	14	15
A	4	4														8
B	5	5	5													15
C			6	6												12
D				4	4	4	4									16
E					3	3	3	3								12
F					4	4	4									12
G									7	7	7	7	7			35
H														2	2	4
																114
Total per week	9	9	11	10	11	11	11	3	7	7	7	7	7	2	2
Total to date	9	18	29	39	50	61	72	75	82	89	96	103	110	112	114
