# Supplementary material
Source: publisher site journal article supplement (https://www.degruyterbrill.com/publication/isbn/9781501506208/downloadAsset/9781501506208_additional%20material.zip)
Supplement: Supplementary file 52 [file Figure 7.25.xlsx]

## Sheet: Figure 7.25
Project Crashing at General Foundry
	TA	TB	TC	TD	TE	TF	TG	TH	CA	CB	CC	CD	CE	CF	CG	CH
	Start A	Start B	Start C	Start D	Start E	Start F	Start G	Start H	Crash A	Crash B	Crash C	Crash D	Crash E	Crash F	Crash G	Crash H
Solution value
Crash cost									750	2000	1000	1000	1000	500	1500	3000	0
Constraints
A --> C	-1		1						1								0	>=	2
A --> D	-1			1					1								0	>=	2
B --> D		-1		1						1							0	>=	3
C --> E			-1		1						1						0	>=	2
C --> F			-1			1					1						0	>=	2
D --> G				-1			1					1					0	>=	4
E --> G					-1		1						1				0	>=	4
F --> H						-1		1						1			0	>=	3
G --> H							-1	1							1		0	>=	5
Crash limit A									1								0	<=	1
Crash limit B										1							0	<=	2
Crash limit C											1						0	<=	1
Crash limit D												1					0	<=	1
Crash limit E													1				0	<=	2
Crash limit F														1			0	<=	1
Crash limit G															1		0	<=	3
Crash limit H																1	0	<=	1
Project finish								1								-1	0	<=	11
																	LHS	Sign	RHS

## Sheet: Figure 7.26
Project Crashing at General Foundry
	TA	TB	TC	TD	TE	TF	TG	TH	CA	CB	CC	CD	CE	CF	CG	CH
	Start A	Start B	Start C	Start D	Start E	Start F	Start G	Start H	Crash A	Crash B	Crash C	Crash D	Crash E	Crash F	Crash G	Crash H
Solution value	0	0	1	3	3	8	7	11	1	0	0	0	0	0	1	0
Crash cost									750	2000	1000	1000	1000	500	1500	3000	2250
Constraints
A --> C	-1		1						1								2	>=	2
A --> D	-1			1					1								4	>=	2
B --> D		-1		1						1							3	>=	3
C --> E			-1		1						1						2	>=	2
C --> F			-1			1					1						7	>=	2
D --> G				-1			1					1					4	>=	4
E --> G					-1		1						1				4	>=	4
F --> H						-1		1						1			3	>=	3
G --> H							-1	1							1		5	>=	5
Crash limit A									1								1	<=	1
Crash limit B										1							0	<=	2
Crash limit C											1						0	<=	1
Crash limit D												1					0	<=	1
Crash limit E													1				0	<=	2
Crash limit F														1			0	<=	1
Crash limit G															1		1	<=	3
Crash limit H																1	0	<=	1
Project finish								1								-1	11	<=	11
																	LHS	Sign	RHS
