# Supplementary material
Source: publisher site journal article supplement (https://www.degruyterbrill.com/publication/isbn/9781501506208/downloadAsset/9781501506208_additional%20material.zip)
Supplement: Supplementary file 53 [file Figure 8.1.xlsx]

## Sheet: Figure 8.1
Thompson Lumber (Dec Making Under Uncertainty)
PAYOFFS	Outcomes			Maximax		Maximin
Alternatives	High demand	Moderate demand	Low demand	Max payoff	Choice	Min payoff	Choice
Large plant	200000	100000	-120000	200000	Best	-120000
Small plant	90000	50000	-20000	90000		-20000
No plant	0	0	0	0		0	Best
PAYOFFS	Outcomes			Hurwicz		Equally likely
Alternatives	Good market	Fair market	Poor market	Realism payoff	Choice	Average payoff	Choice
Large plant	200000	100000	-120000	24000		60000	Best
Small plant	90000	50000	-20000	29500	Best	40000
No plant	0	0	0	0		0
				a =	0.45
REGRET	Outcomes			Minimax
Alternatives	High demand	Moderate demand	Low demand	Max regret	Choice
Large plant	0	0	120000	120000
Small plant	110000	50000	20000	110000	Best
No plant	200000	100000	0	200000

## Sheet: Figure 8.2
Thompson Lumber (Dec Making Under Uncertainty)
PAYOFFS	Outcomes			Maximax		Maximin
Alternatives	High demand	Moderate demand	Low demand	Max payoff	Choice	Min payoff	Choice
Large plant	200000	100000	-120000	200000	Best	-120000
Small plant	90000	50000	-20000	90000		-20000
No plant	0	0	0	0		0	Best
PAYOFFS	Outcomes			Hurwicz		Equally likely
Alternatives	High demand	Moderate demand	Low demand	Realism payoff	Choice	Average payoff	Choice
Large plant	200000	100000	-120000	24000		60000	Best
Small plant	90000	50000	-20000	29500	Best	40000
No plant	0	0	0	0		0
				a =	0.45
REGRET	Outcomes			Minimax
Alternatives	High demand	Moderate demand	Low demand	Max regret	Choice
Large plant	0	0	120000	120000
Small plant	110000	50000	20000	110000	Best
No plant	200000	100000	0	200000
