# Supplementary material
Source: publisher site journal article supplement (https://www.degruyterbrill.com/publication/isbn/9781501506208/downloadAsset/9781501506208_additional%20material.zip)
Supplement: Supplementary file 54 [file Figure 8.3.xlsx]

## Sheet: Figure 8.3
Thompson Lumber (Dec Making Under Risk)
PAYOFFS	Outcomes			Maximize EMV
Alternatives	High demand	Moderate demand	Low demand	EMV	Choice
Large plant	200000	100000	-120000	86000	Best
Small plant	90000	50000	-20000	48000
No plant	0	0	0	0
Probability	0.3	0.5	0.2
Best outcome	200000	100000	0
Expected Value WITH Perfect Information (EVwPI) =					110000
Best Expected Monetary Value (EMV) =					86000
Expected Value OF Perfect Information (EVPI) =					24000
REGRET	Outcomes			Minimize EOL
Alternatives	High demand	Moderate demand	Low demand	EOL	Choice
Large plant	0	0	120000	24000	Best
Small plant	110000	50000	20000	62000
No plant	200000	100000	0	110000
Probability	0.3	0.5	0.2

## Sheet: Figure 8.4
Thompson Lumber (Dec Making Under Risk)
PAYOFFS	Outcomes			Maximize EMV
Alternatives	High demand	Moderate demand	Low demand	EMV	Choice
Large plant	200000	100000	-120000	86000	Best
Small plant	90000	50000	-20000	48000
No plant	0	0	0	0
Probability	0.3	0.5	0.2
Best outcome	200000	100000	0
Expected Value WITH Perfect Information (EVwPI) =					110000
Best Expected Monetary Value (EMV) =					86000
Expected Value OF Perfect Information (EVPI) =					24000
REGRET	Outcomes			Minimize EOL
Alternatives	High demand	Moderate demand	Low demand	EOL	Choice
Large plant	0	0	120000	24000	Best
Small plant	110000	50000	20000	62000
No plant	200000	100000	0	110000
Probability	0.3	0.5	0.2
