# Supplementary material
Source: publisher site journal article supplement (https://www.degruyterbrill.com/publication/isbn/9781501506208/downloadAsset/9781501506208_additional%20material.zip)
Supplement: Supplementary file 55 [file Figure 9.10.xlsx]

## Sheet: Figure 9.10
Arnold's Muffler Shop
Queuing Model	M/M/s (Exponential Service Times)
Input Data			Operating Characteristics
Arrival rate (l)	2		Average server utilization (r)	0.333333
Service rate (m)	3		Average number of customers in the queue (Lq)	0.0833333
Number of servers (s)	2		Average number of customers in the system (L)	0.75
			Average waiting time in the queue (Wq)	0.0416667
			Average time in the system (W)	0.375
			Probability (% of time) system is empty (P0)	0.5
Probabilities
Number of Units	Probability	Cumulative Probability
0	0.5	0.5
1	0.333333	0.833333
2	0.111111	0.944444
3	0.037037	0.981481
4	0.0123457	0.993827
5	0.00411523	0.997942
6	0.00137174	0.999314
7	0.000457247	0.999771
8	0.000152416	0.999924
9	5.08053e-05	0.999975
10	1.69351e-05	0.999992
11	5.64503e-06	0.999997
12	1.88168e-06	0.999999
13	6.27225e-07	1
14	2.09075e-07	1
15	6.96917e-08	1
16	2.32306e-08	1
17	7.74352e-09	1
18	2.58117e-09	1
19	8.60392e-10	1
20	2.86797e-10	1
Computations
n or s	(lam/mu)^n/n!	Cumsum(n-1)	term2	P0(s)	Rho(s)	Lq(s)	L(s)	Wq(s)	W(S)
0	1
1	0.666667	1	2	0.333333	0.666667	1.33333	2	0.666667	1
2	0.222222	1.66667	0.333333	0.5	0.333333	0.0833333	0.75	0.0416667	0.375
3	0.0493827	1.88889	0.0634921	0.512195	0.222222	0.00929152	0.675958	0.00464576	0.337979
4	0.00823045	1.93827	0.00987654	0.513308	0.166667	0.00101394	0.667681	0.000506971	0.33384
5	0.00109739	1.9465	0.00126622	0.513408	0.133333	0.000100014	0.666767	5.00069e-05	0.333383
6	0.000121933	1.9476	0.000137174	0.513416	0.111111	8.80344e-06	0.666675	4.40172e-06	0.333338
7	1.16126e-05	1.94772	1.2835e-05	0.513417	0.0952381	6.93654e-07	0.666667	3.46827e-07	0.333334
8	9.67719e-07	1.94773	1.05569e-06	0.513417	0.0833333	4.92738e-08	0.666667	2.46369e-08	0.333333
9	7.16829e-08	1.94773	7.74175e-08	0.513417	0.0740741	3.1798e-09	0.666667	1.5899e-09	0.333333
10	4.77886e-09	1.94773	5.12021e-09	0.513417	0.0666667	1.87772e-10	0.666667	9.38858e-11	0.333333
11	2.89628e-10	1.94773	3.08314e-10	0.513417	0.0606061	1.02125e-11	0.666667	5.10624e-12	0.333333
12	1.60904e-11	1.94773	1.70369e-11	0.513417	0.0555556	5.14533e-13	0.666667	2.57266e-13	0.333333
13	8.25151e-13	1.94773	8.69754e-13	0.513417	0.0512821	2.41376e-14	0.666667	1.20688e-14	0.333333
14	3.92929e-14	1.94773	4.12575e-14	0.513417	0.047619	1.05912e-15	0.666667	5.29558e-16	0.333333
15	1.74635e-15	1.94773	1.82758e-15	0.513417	0.0444444	4.36423e-17	0.666667	2.18211e-17	0.333333
16	7.27646e-17	1.94773	7.59283e-17	0.513417	0.0416667	1.69491e-18	0.666667	8.47454e-19	0.333333
17	2.85351e-18	1.94773	2.96998e-18	0.513417	0.0392157	6.22384e-20	0.666667	3.11192e-20	0.333333
18	1.05686e-19	1.94773	1.09751e-19	0.513417	0.037037	2.16722e-21	0.666667	1.08361e-21	0.333333
19	3.70827e-21	1.94773	3.84312e-21	0.513417	0.0350877	7.17499e-23	0.666667	3.58749e-23	0.333333
20	1.23609e-22	1.94773	1.27871e-22	0.513417	0.0333333	2.26384e-24	0.666667	1.13192e-24	0.333333
21	3.9241e-24	1.94773	4.05276e-24	0.513417	0.031746	6.82214e-26	0.666667	3.41107e-26	0.333333
22	1.18912e-25	1.94773	1.22628e-25	0.513417	0.030303	1.96748e-27	0.666667	9.83739e-28	0.333333
23	3.44672e-27	1.94773	3.54961e-27	0.513417	0.0289855	5.44009e-29	0.666667	2.72005e-29	0.333333
24	9.57424e-29	1.94773	9.84779e-29	0.513417	0.0277778	1.44458e-30	0.666667	7.22289e-31	0.333333
25	2.55313e-30	1.94773	2.62308e-30	0.513417	0.0266667	3.68968e-32	0.666667	1.84484e-32	0.333333
26	6.54649e-32	1.94773	6.71876e-32	0.513417	0.025641	9.0777e-34	0.666667	4.53885e-34	0.333333
27	1.61642e-33	1.94773	1.65734e-33	0.513417	0.0246914	2.15419e-35	0.666667	1.0771e-35	0.333333
28	3.84861e-35	1.94773	3.94248e-35	0.513417	0.0238095	4.93692e-37	0.666667	2.46846e-37	0.333333
29	8.84738e-37	1.94773	9.05555e-37	0.513417	0.0229885	1.09395e-38	0.666667	5.46974e-39	0.333333
30	1.96608e-38	1.94773	2.01077e-38	0.513417	0.0222222	2.34628e-40	0.666667	1.17314e-40	0.333333
