# Supplementary material
Source: publisher site journal article supplement (https://www.degruyterbrill.com/publication/isbn/9781501506208/downloadAsset/9781501506208_additional%20material.zip)
Supplement: Supplementary file 56 [file Figure 9.11.xlsx]

## Sheet: Figure 9.11
Garcia-Golding Recycling
Queuing Model	M/D/1 (Constant Service Times)
Input Data			Operating Characteristics
Arrival rate (l)	8		Average server utilization (r)	0.666667
Service rate (m)	12		Average number of customers in the queue (Lq)	0.666667
			Average number of customers in the system (L)	1.33333
			Average waiting time in the queue (Wq)	0.0833333
			Average time in the system (W)	0.166667
			Probability (% of time) system is empty (P0)	0.333333
