# Supplementary material
Source: publisher site journal article supplement (https://www.degruyterbrill.com/publication/isbn/9781501506208/downloadAsset/9781501506208_additional%20material.zip)
Supplement: Supplementary file 57 [file Figure 9.12.xlsx]

## Sheet: Figure 9.12
Professor Crino's Problem
Queuing Model	M/G/1 (General Service Times)
Input Data			Operating Characteristics
Arrival rate (l)	5		Average server utilization (r)	0.833333
Service rate (m)	6		Average number of customers in the queue (Lq)	2.60375
Standard deviation (s)	0.0833		Average number of customers in the system (L)	3.43708
			Average waiting time in the queue (Wq)	0.52075
			Average time in the system (W)	0.687417
			Probability (% of time) system is empty (P0)	0.166667

## Sheet: Figure 9.14
Professor Crino's Problem
Queuing Model	M/G/1 (General Service Times)
Input Data			Operating Characteristics
Arrival rate (l)	5		Average server utilization (r)	0.722554
Service rate (m)	6.9199		Average number of customers in the queue (Lq)	1.2535
Standard deviation (s)	0.0833		Average number of customers in the system (L)	1.97605
			Average waiting time in the queue (Wq)	0.250699
			Average time in the system (W)	0.39521
			Probability (% of time) system is empty (P0)	0.277446
