# Supplementary material
Source: publisher site journal article supplement (https://www.degruyterbrill.com/publication/isbn/9781501506208/downloadAsset/9781501506208_additional%20material.zip)
Supplement: Supplementary file 58 [file Figure 9.15.xlsx]

## Sheet: Figure 9.15
Department of Commerce
Queuing Model	M/M/s with a finite population
Input Data			Operating Characteristics
Arrival rate per customer (l)	0.05		Average server utilization (r)	0.436048
Service rate (m)	0.5		Average number of customers in the queue (Lq)	0.203474
Number of servers (s)	1		Average number of customers in the system (L)	0.639522
Population size (N)	5		Average waiting time in the queue (Wq)	0.933264
			Average time in the system (W)	2.93326
			Probability (% of time) system is empty (P0)	0.563952
			Effective arrival rate	0.218024
Probabilities								1.7732
Number of Units	Probability	Cumulative Probability	Number waiting	Arrival rate(n)	Term 1	Sum term 1	Term 2	Sum term 2	Decum term 2	P0(s)
0	0.563952	0.563952	0	0.25	1	1	1	1	0.7732
1	0.281976	0.845928	0	0.2	0.5	1.5	0.5	1.5	0.2732	0.563952
2	0.11279	0.958719	1	0.15			0.2	1.7	0.0732
3	0.0338371	0.992556	2	0.1			0.06	1.76	0.0132
4	0.00676743	0.999323	3	0.05			0.012	1.772	0.0012
5	0.000676743	1	4	0			0.0012	1.7732	0
6
7
8
9
10
11
12
13
14
15
16
17
18
19
20
21
22
23
24
25
26
27
28
29
30
31

## Sheet: Figure 9.16
Department of Commerce
Queuing Model	M/M/s with a finite population
Input Data			Operating Characteristics
Arrival rate per customer (l)	0.05		Average server utilization (r)	0.22676
Service rate (m)	0.5		Average number of customers in the queue (Lq)	0.0112738
Number of servers (s)	2		Average number of customers in the system (L)	0.464794
Population size (N)	5		Average waiting time in the queue (Wq)	0.049717
			Average time in the system (W)	2.04972
			Probability (% of time) system is empty (P0)	0.618592
			Effective arrival rate	0.22676
Probabilities								2.61658
Number of Units	Probability	Cumulative Probability	Number waiting	Arrival rate(n)	Term 1	Sum term 1	Term 2	Sum term 2	Decum term 2	P0(s)
0	0.618592	0.618592	0	0.25	1	1	2	2	0.616575
1	0.309296	0.927888	0	0.2	0.5	1.5	0.5	2.5	0.116575
2	0.0618592	0.989747	0	0.15	0.1	1.6	0.1	2.6	0.016575	0.618592
3	0.00927888	0.999026	1	0.1			0.015	2.615	0.001575
4	0.000927888	0.999954	2	0.05			0.0015	2.6165	7.5e-05
5	4.63944e-05	1	3	0			7.5e-05	2.61658	0
6
7
8
9
10
11
12
13
14
15
16
17
18
19
20
21
22
23
24
25
26
27
28
29
30
31
