# Supplementary material
Source: publisher site journal article supplement (https://www.degruyterbrill.com/publication/isbn/9781501506208/downloadAsset/9781501506208_additional%20material.zip)
Supplement: Supplementary file 60 [file Figure 9.18.xlsx]

## Sheet: Figure 9.18
Solved Problem 9-3
Queuing Model	M/M/s (Exponential Service Times)
Input Data			Operating Characteristics
Arrival rate (l)	20		Average server utilization (r)	0.333333
Service rate (m)	30		Average number of customers in the queue (Lq)	0.0833333
Number of servers (s)	2		Average number of customers in the system (L)	0.75
			Average waiting time in the queue (Wq)	0.00416667
			Average time in the system (W)	0.0375
			Probability (% of time) system is empty (P0)	0.5
Probabilities
Number of Units	Probability	Cumulative Probability
0	0.5	0.5
1	0.333333	0.833333
2	0.111111	0.944444
3	0.037037	0.981481
4	0.0123457	0.993827
5	0.00411523	0.997942
6	0.00137174	0.999314
7	0.000457247	0.999771
8	0.000152416	0.999924
9	5.08053e-05	0.999975
10	1.69351e-05	0.999992
11	5.64503e-06	0.999997
12	1.88168e-06	0.999999
13	6.27225e-07	1
14	2.09075e-07	1
15	6.96917e-08	1
16	2.32306e-08	1
17	7.74352e-09	1
18	2.58117e-09	1
19	8.60392e-10	1
20	2.86797e-10	1
Computations
n or s	(lam/mu)^n/n!	Cumsum(n-1)	term2	P0(s)	Rho(s)	Lq(s)	L(s)	Wq(s)	W(S)
0	1
1	0.666667	1	2	0.333333	0.666667	1.33333	2	0.0666667	0.1
2	0.222222	1.66667	0.333333	0.5	0.333333	0.0833333	0.75	0.00416667	0.0375
3	0.0493827	1.88889	0.0634921	0.512195	0.222222	0.00929152	0.675958	0.000464576	0.0337979
4	0.00823045	1.93827	0.00987654	0.513308	0.166667	0.00101394	0.667681	5.06971e-05	0.033384
5	0.00109739	1.9465	0.00126622	0.513408	0.133333	0.000100014	0.666767	5.00069e-06	0.0333383
6	0.000121933	1.9476	0.000137174	0.513416	0.111111	8.80344e-06	0.666675	4.40172e-07	0.0333338
7	1.16126e-05	1.94772	1.2835e-05	0.513417	0.0952381	6.93654e-07	0.666667	3.46827e-08	0.0333334
8	9.67719e-07	1.94773	1.05569e-06	0.513417	0.0833333	4.92738e-08	0.666667	2.46369e-09	0.0333333
9	7.16829e-08	1.94773	7.74175e-08	0.513417	0.0740741	3.1798e-09	0.666667	1.5899e-10	0.0333333
10	4.77886e-09	1.94773	5.12021e-09	0.513417	0.0666667	1.87772e-10	0.666667	9.38858e-12	0.0333333
11	2.89628e-10	1.94773	3.08314e-10	0.513417	0.0606061	1.02125e-11	0.666667	5.10624e-13	0.0333333
12	1.60904e-11	1.94773	1.70369e-11	0.513417	0.0555556	5.14533e-13	0.666667	2.57266e-14	0.0333333
13	8.25151e-13	1.94773	8.69754e-13	0.513417	0.0512821	2.41376e-14	0.666667	1.20688e-15	0.0333333
14	3.92929e-14	1.94773	4.12575e-14	0.513417	0.047619	1.05912e-15	0.666667	5.29558e-17	0.0333333
15	1.74635e-15	1.94773	1.82758e-15	0.513417	0.0444444	4.36423e-17	0.666667	2.18211e-18	0.0333333
16	7.27646e-17	1.94773	7.59283e-17	0.513417	0.0416667	1.69491e-18	0.666667	8.47454e-20	0.0333333
17	2.85351e-18	1.94773	2.96998e-18	0.513417	0.0392157	6.22384e-20	0.666667	3.11192e-21	0.0333333
18	1.05686e-19	1.94773	1.09751e-19	0.513417	0.037037	2.16722e-21	0.666667	1.08361e-22	0.0333333
19	3.70827e-21	1.94773	3.84312e-21	0.513417	0.0350877	7.17499e-23	0.666667	3.58749e-24	0.0333333
20	1.23609e-22	1.94773	1.27871e-22	0.513417	0.0333333	2.26384e-24	0.666667	1.13192e-25	0.0333333
21	3.9241e-24	1.94773	4.05276e-24	0.513417	0.031746	6.82214e-26	0.666667	3.41107e-27	0.0333333
22	1.18912e-25	1.94773	1.22628e-25	0.513417	0.030303	1.96748e-27	0.666667	9.83739e-29	0.0333333
23	3.44672e-27	1.94773	3.54961e-27	0.513417	0.0289855	5.44009e-29	0.666667	2.72005e-30	0.0333333
24	9.57424e-29	1.94773	9.84779e-29	0.513417	0.0277778	1.44458e-30	0.666667	7.22289e-32	0.0333333
25	2.55313e-30	1.94773	2.62308e-30	0.513417	0.0266667	3.68968e-32	0.666667	1.84484e-33	0.0333333
26	6.54649e-32	1.94773	6.71876e-32	0.513417	0.025641	9.0777e-34	0.666667	4.53885e-35	0.0333333
27	1.61642e-33	1.94773	1.65734e-33	0.513417	0.0246914	2.15419e-35	0.666667	1.0771e-36	0.0333333
28	3.84861e-35	1.94773	3.94248e-35	0.513417	0.0238095	4.93692e-37	0.666667	2.46846e-38	0.0333333
29	8.84738e-37	1.94773	9.05555e-37	0.513417	0.0229885	1.09395e-38	0.666667	5.46974e-40	0.0333333
30	1.96608e-38	1.94773	2.01077e-38	0.513417	0.0222222	2.34628e-40	0.666667	1.17314e-41	0.0333333
