# Supplementary material
Source: publisher site journal article supplement (https://www.degruyterbrill.com/publication/isbn/9781501506208/downloadAsset/9781501506208_additional%20material.zip)
Supplement: Supplementary file 61 [file Figure 9.7.xlsx]

## Sheet: Figure 9.7
Problem Title
Queuing Model	M/M/s (Exponential Service Times)
Input Data			Operating Characteristics
Arrival rate (l)			Average server utilization (r)	#VALUE!
Service rate (m)			Average number of customers in the queue (Lq)	#N/A
Number of servers (s)			Average number of customers in the system (L)	#N/A
			Average waiting time in the queue (Wq)	#N/A
			Average time in the system (W)	#N/A
			Probability (% of time) system is empty (P0)	#N/A
ERROR. The total service rate (rate x servers) must be greater than the arrival rate.
Probabilities
Number of Units	Probability	Cumulative Probability
0	#N/A	#N/A
1	#VALUE!	#N/A
2	#VALUE!	#N/A
3	#VALUE!	#N/A
4	#VALUE!	#N/A
5	#VALUE!	#N/A
6	#VALUE!	#N/A
7	#VALUE!	#N/A
8	#VALUE!	#N/A
9	#VALUE!	#N/A
10	#VALUE!	#N/A
11	#VALUE!	#N/A
12	#VALUE!	#N/A
13	#VALUE!	#N/A
14	#VALUE!	#N/A
15	#VALUE!	#N/A
16	#VALUE!	#N/A
17	#VALUE!	#N/A
18	#VALUE!	#N/A
19	#VALUE!	#N/A
20	#VALUE!	#N/A
Computations
n or s	(lam/mu)^n/n!	Cumsum(n-1)	term2	P0(s)	Rho(s)	Lq(s)	L(s)	Wq(s)	W(S)
0	1
1	#VALUE!	1	#VALUE!	#VALUE!	#VALUE!	#VALUE!	#VALUE!	#VALUE!	#VALUE!
2	#VALUE!	#VALUE!	#VALUE!	#VALUE!	#VALUE!	#VALUE!	#VALUE!	#VALUE!	#VALUE!
3	#VALUE!	#VALUE!	#VALUE!	#VALUE!	#VALUE!	#VALUE!	#VALUE!	#VALUE!	#VALUE!
4	#VALUE!	#VALUE!	#VALUE!	#VALUE!	#VALUE!	#VALUE!	#VALUE!	#VALUE!	#VALUE!
5	#VALUE!	#VALUE!	#VALUE!	#VALUE!	#VALUE!	#VALUE!	#VALUE!	#VALUE!	#VALUE!
6	#VALUE!	#VALUE!	#VALUE!	#VALUE!	#VALUE!	#VALUE!	#VALUE!	#VALUE!	#VALUE!
7	#VALUE!	#VALUE!	#VALUE!	#VALUE!	#VALUE!	#VALUE!	#VALUE!	#VALUE!	#VALUE!
8	#VALUE!	#VALUE!	#VALUE!	#VALUE!	#VALUE!	#VALUE!	#VALUE!	#VALUE!	#VALUE!
9	#VALUE!	#VALUE!	#VALUE!	#VALUE!	#VALUE!	#VALUE!	#VALUE!	#VALUE!	#VALUE!
10	#VALUE!	#VALUE!	#VALUE!	#VALUE!	#VALUE!	#VALUE!	#VALUE!	#VALUE!	#VALUE!
11	#VALUE!	#VALUE!	#VALUE!	#VALUE!	#VALUE!	#VALUE!	#VALUE!	#VALUE!	#VALUE!
12	#VALUE!	#VALUE!	#VALUE!	#VALUE!	#VALUE!	#VALUE!	#VALUE!	#VALUE!	#VALUE!
13	#VALUE!	#VALUE!	#VALUE!	#VALUE!	#VALUE!	#VALUE!	#VALUE!	#VALUE!	#VALUE!
14	#VALUE!	#VALUE!	#VALUE!	#VALUE!	#VALUE!	#VALUE!	#VALUE!	#VALUE!	#VALUE!
15	#VALUE!	#VALUE!	#VALUE!	#VALUE!	#VALUE!	#VALUE!	#VALUE!	#VALUE!	#VALUE!
16	#VALUE!	#VALUE!	#VALUE!	#VALUE!	#VALUE!	#VALUE!	#VALUE!	#VALUE!	#VALUE!
17	#VALUE!	#VALUE!	#VALUE!	#VALUE!	#VALUE!	#VALUE!	#VALUE!	#VALUE!	#VALUE!
18	#VALUE!	#VALUE!	#VALUE!	#VALUE!	#VALUE!	#VALUE!	#VALUE!	#VALUE!	#VALUE!
19	#VALUE!	#VALUE!	#VALUE!	#VALUE!	#VALUE!	#VALUE!	#VALUE!	#VALUE!	#VALUE!
20	#VALUE!	#VALUE!	#VALUE!	#VALUE!	#VALUE!	#VALUE!	#VALUE!	#VALUE!	#VALUE!
21	#VALUE!	#VALUE!	#VALUE!	#VALUE!	#VALUE!	#VALUE!	#VALUE!	#VALUE!	#VALUE!
22	#VALUE!	#VALUE!	#VALUE!	#VALUE!	#VALUE!	#VALUE!	#VALUE!	#VALUE!	#VALUE!
23	#VALUE!	#VALUE!	#VALUE!	#VALUE!	#VALUE!	#VALUE!	#VALUE!	#VALUE!	#VALUE!
24	#VALUE!	#VALUE!	#VALUE!	#VALUE!	#VALUE!	#VALUE!	#VALUE!	#VALUE!	#VALUE!
25	#VALUE!	#VALUE!	#VALUE!	#VALUE!	#VALUE!	#VALUE!	#VALUE!	#VALUE!	#VALUE!
26	#VALUE!	#VALUE!	#VALUE!	#VALUE!	#VALUE!	#VALUE!	#VALUE!	#VALUE!	#VALUE!
27	#VALUE!	#VALUE!	#VALUE!	#VALUE!	#VALUE!	#VALUE!	#VALUE!	#VALUE!	#VALUE!
28	#VALUE!	#VALUE!	#VALUE!	#VALUE!	#VALUE!	#VALUE!	#VALUE!	#VALUE!	#VALUE!
29	#VALUE!	#VALUE!	#VALUE!	#VALUE!	#VALUE!	#VALUE!	#VALUE!	#VALUE!	#VALUE!
30	#VALUE!	#VALUE!	#VALUE!	#VALUE!	#VALUE!	#VALUE!	#VALUE!	#VALUE!	#VALUE!

## Sheet: Figure 9.8
Arnold's Muffler Shop
Queuing Model	M/M/s (Exponential Service Times)
Input Data			Operating Characteristics
Arrival rate (l)	2		Average server utilization (r)	0.666667
Service rate (m)	3		Average number of customers in the queue (Lq)	1.33333
Number of servers (s)	1		Average number of customers in the system (L)	2
			Average waiting time in the queue (Wq)	0.666667
			Average time in the system (W)	1
			Probability (% of time) system is empty (P0)	0.333333
Probabilities
Number of Units	Probability	Cumulative Probability
0	0.333333	0.333333
1	0.222222	0.555556
2	0.148148	0.703704
3	0.0987654	0.802469
4	0.0658436	0.868313
5	0.0438957	0.912209
6	0.0292638	0.941472
7	0.0195092	0.960982
8	0.0130061	0.973988
9	0.00867076	0.982658
10	0.00578051	0.988439
11	0.00385367	0.992293
12	0.00256912	0.994862
13	0.00171274	0.996575
14	0.00114183	0.997716
15	0.000761219	0.998478
16	0.00050748	0.998985
17	0.00033832	0.999323
18	0.000225546	0.999549
19	0.000150364	0.999699
20	0.000100243	0.9998
Computations
n or s	(lam/mu)^n/n!	Cumsum(n-1)	term2	P0(s)	Rho(s)	Lq(s)	L(s)	Wq(s)	W(S)
0	1
1	0.666667	1	2	0.333333	0.666667	1.33333	2	0.666667	1
2	0.222222	1.66667	0.333333	0.5	0.333333	0.0833333	0.75	0.0416667	0.375
3	0.0493827	1.88889	0.0634921	0.512195	0.222222	0.00929152	0.675958	0.00464576	0.337979
4	0.00823045	1.93827	0.00987654	0.513308	0.166667	0.00101394	0.667681	0.000506971	0.33384
5	0.00109739	1.9465	0.00126622	0.513408	0.133333	0.000100014	0.666767	5.00069e-05	0.333383
6	0.000121933	1.9476	0.000137174	0.513416	0.111111	8.80344e-06	0.666675	4.40172e-06	0.333338
7	1.16126e-05	1.94772	1.2835e-05	0.513417	0.0952381	6.93654e-07	0.666667	3.46827e-07	0.333334
8	9.67719e-07	1.94773	1.05569e-06	0.513417	0.0833333	4.92738e-08	0.666667	2.46369e-08	0.333333
9	7.16829e-08	1.94773	7.74175e-08	0.513417	0.0740741	3.1798e-09	0.666667	1.5899e-09	0.333333
10	4.77886e-09	1.94773	5.12021e-09	0.513417	0.0666667	1.87772e-10	0.666667	9.38858e-11	0.333333
11	2.89628e-10	1.94773	3.08314e-10	0.513417	0.0606061	1.02125e-11	0.666667	5.10624e-12	0.333333
12	1.60904e-11	1.94773	1.70369e-11	0.513417	0.0555556	5.14533e-13	0.666667	2.57266e-13	0.333333
13	8.25151e-13	1.94773	8.69754e-13	0.513417	0.0512821	2.41376e-14	0.666667	1.20688e-14	0.333333
14	3.92929e-14	1.94773	4.12575e-14	0.513417	0.047619	1.05912e-15	0.666667	5.29558e-16	0.333333
15	1.74635e-15	1.94773	1.82758e-15	0.513417	0.0444444	4.36423e-17	0.666667	2.18211e-17	0.333333
16	7.27646e-17	1.94773	7.59283e-17	0.513417	0.0416667	1.69491e-18	0.666667	8.47454e-19	0.333333
17	2.85351e-18	1.94773	2.96998e-18	0.513417	0.0392157	6.22384e-20	0.666667	3.11192e-20	0.333333
18	1.05686e-19	1.94773	1.09751e-19	0.513417	0.037037	2.16722e-21	0.666667	1.08361e-21	0.333333
19	3.70827e-21	1.94773	3.84312e-21	0.513417	0.0350877	7.17499e-23	0.666667	3.58749e-23	0.333333
20	1.23609e-22	1.94773	1.27871e-22	0.513417	0.0333333	2.26384e-24	0.666667	1.13192e-24	0.333333
21	3.9241e-24	1.94773	4.05276e-24	0.513417	0.031746	6.82214e-26	0.666667	3.41107e-26	0.333333
22	1.18912e-25	1.94773	1.22628e-25	0.513417	0.030303	1.96748e-27	0.666667	9.83739e-28	0.333333
23	3.44672e-27	1.94773	3.54961e-27	0.513417	0.0289855	5.44009e-29	0.666667	2.72005e-29	0.333333
24	9.57424e-29	1.94773	9.84779e-29	0.513417	0.0277778	1.44458e-30	0.666667	7.22289e-31	0.333333
25	2.55313e-30	1.94773	2.62308e-30	0.513417	0.0266667	3.68968e-32	0.666667	1.84484e-32	0.333333
26	6.54649e-32	1.94773	6.71876e-32	0.513417	0.025641	9.0777e-34	0.666667	4.53885e-34	0.333333
27	1.61642e-33	1.94773	1.65734e-33	0.513417	0.0246914	2.15419e-35	0.666667	1.0771e-35	0.333333
28	3.84861e-35	1.94773	3.94248e-35	0.513417	0.0238095	4.93692e-37	0.666667	2.46846e-37	0.333333
29	8.84738e-37	1.94773	9.05555e-37	0.513417	0.0229885	1.09395e-38	0.666667	5.46974e-39	0.333333
30	1.96608e-38	1.94773	2.01077e-38	0.513417	0.0222222	2.34628e-40	0.666667	1.17314e-40	0.333333

## Sheet: Figure 9.9
Arnold's Muffler Shop
Queuing Model	M/M/s (Exponential Service Times)
Input Data			Operating Characteristics
Arrival rate (l)	2		Average server utilization (r)	0.5
Service rate (m)	4		Average number of customers in the queue (Lq)	0.5
Number of servers (s)	1		Average number of customers in the system (L)	1
			Average waiting time in the queue (Wq)	0.25
			Average time in the system (W)	0.5
			Probability (% of time) system is empty (P0)	0.5
Probabilities
Number of Units	Probability	Cumulative Probability
0	0.5	0.5
1	0.25	0.75
2	0.125	0.875
3	0.0625	0.9375
4	0.03125	0.96875
5	0.015625	0.984375
6	0.0078125	0.992188
7	0.00390625	0.996094
8	0.00195312	0.998047
9	0.000976562	0.999023
10	0.000488281	0.999512
11	0.000244141	0.999756
12	0.00012207	0.999878
13	6.10352e-05	0.999939
14	3.05176e-05	0.999969
15	1.52588e-05	0.999985
16	7.62939e-06	0.999992
17	3.8147e-06	0.999996
18	1.90735e-06	0.999998
19	9.53674e-07	0.999999
20	4.76837e-07	1
Computations
n or s	(lam/mu)^n/n!	Cumsum(n-1)	term2	P0(s)	Rho(s)	Lq(s)	L(s)	Wq(s)	W(S)
0	1
1	0.5	1	1	0.5	0.5	0.5	1	0.25	0.5
2	0.125	1.5	0.166667	0.6	0.25	0.0333333	0.533333	0.0166667	0.266667
3	0.0208333	1.625	0.025	0.606061	0.166667	0.0030303	0.50303	0.00151515	0.251515
4	0.00260417	1.64583	0.00297619	0.606498	0.125	0.000257865	0.500258	0.000128932	0.250129
5	0.000260417	1.64844	0.000289352	0.606529	0.1	1.95e-05	0.50002	9.75001e-06	0.25001
6	2.17014e-05	1.6487	2.36742e-05	0.606531	0.0833333	1.30538e-06	0.500001	6.52689e-07	0.250001
7	1.5501e-06	1.64872	1.66934e-06	0.606531	0.0714286	7.7885e-08	0.5	3.89425e-08	0.25
8	9.68812e-08	1.64872	1.0334e-07	0.606531	0.0625	4.17859e-09	0.5	2.08929e-09	0.25
9	5.38229e-09	1.64872	5.69889e-09	0.606531	0.0555556	2.03327e-10	0.5	1.01663e-10	0.25
10	2.69114e-10	1.64872	2.83278e-10	0.606531	0.05	9.043e-12	0.5	4.5215e-12	0.25
11	1.22325e-11	1.64872	1.2815e-11	0.606531	0.0454545	3.70127e-13	0.5	1.85064e-13	0.25
12	5.09686e-13	1.64872	5.31847e-13	0.606531	0.0416667	1.40253e-14	0.5	7.01264e-15	0.25
13	1.96033e-14	1.64872	2.03875e-14	0.606531	0.0384615	4.94625e-16	0.5	2.47312e-16	0.25
14	7.00119e-16	1.64872	7.26049e-16	0.606531	0.0357143	1.631e-17	0.5	8.15502e-18	0.25
15	2.33373e-17	1.64872	2.4142e-17	0.606531	0.0333333	5.04927e-19	0.5	2.52463e-19	0.25
16	7.2929e-19	1.64872	7.52816e-19	0.606531	0.03125	1.47292e-20	0.5	7.36461e-21	0.25
17	2.14497e-20	1.64872	2.20997e-20	0.606531	0.0294118	4.06186e-22	0.5	2.03093e-22	0.25
18	5.95825e-22	1.64872	6.12849e-22	0.606531	0.0277778	1.06203e-23	0.5	5.31017e-24	0.25
19	1.56796e-23	1.64872	1.61034e-23	0.606531	0.0263158	2.63978e-25	0.5	1.31989e-25	0.25
20	3.9199e-25	1.64872	4.02041e-25	0.606531	0.025	6.25258e-27	0.5	3.12629e-27	0.25
21	9.33311e-27	1.64872	9.56074e-27	0.606531	0.0238095	1.41436e-28	0.5	7.07181e-29	0.25
22	2.12116e-28	1.64872	2.17049e-28	0.606531	0.0227273	3.06155e-30	0.5	1.53078e-30	0.25
23	4.61122e-30	1.64872	4.71369e-30	0.606531	0.0217391	6.35333e-32	0.5	3.17666e-32	0.25
24	9.6067e-32	1.64872	9.8111e-32	0.606531	0.0208333	1.26611e-33	0.5	6.33057e-34	0.25
25	1.92134e-33	1.64872	1.96055e-33	0.606531	0.02	2.42681e-35	0.5	1.2134e-35	0.25
26	3.69489e-35	1.64872	3.76734e-35	0.606531	0.0192308	4.4804e-37	0.5	2.2402e-37	0.25
27	6.84238e-37	1.64872	6.97148e-37	0.606531	0.0185185	7.97815e-39	0.5	3.98907e-39	0.25
28	1.22185e-38	1.64872	1.24407e-38	0.606531	0.0178571	1.37194e-40	0.5	6.85969e-41	0.25
29	2.10664e-40	1.64872	2.1436e-40	0.606531	0.0172414	2.28098e-42	0.5	1.14049e-42	0.25
30	3.51107e-42	1.64872	3.57058e-42	0.606531	0.0166667	3.67063e-44	0.5	1.83531e-44	0.25
