# Supplementary material
Source: publisher site journal article supplement (https://www.degruyterbrill.com/publication/isbn/9781501506208/downloadAsset/9781501506208_additional%20material.zip)
Supplement: Supplementary file 62 [file Figure 10.13.xlsx]

## Sheet: Figure 10.13
Denton Savings Bank														Data Table
Calculations set to Manual. Press F9 to recalculate.
Custo-mer #	Time between arrivals	Arrival time	Start service	Service time	End service	Wait time	Queue length		Time	Proba-bility	RN intvl lower limit	RN intvl upper limit		Run	Avg wait time	Avg queue length
0	0	0	0	0	0	0	0							1	1.64	0.86
1	3	3	3	2	5	0	0		Arrival Distribution					2	1.36667	0.706667
2	2	5	5	3	8	0	0		0	0.1	0	0.1		3	3.86	1.76
3	4	9	9	2	11	0	0		1	0.15	0.1	0.25		4	4.94	2.2
4	3	12	12	3	15	0	0		2	0.1	0.25	0.35		5	2.53333	1.18
5	3	15	15	3	18	0	0		3	0.35	0.35	0.7		6	2.53333	1.24
6	4	19	19	3	22	0	0		4	0.25	0.7	0.95		7	3.08667	1.47333
7	4	23	23	3	26	0	0		5	0.05	0.95	1		8	3.44667	1.56
8	2	25	26	1	27	1	1							9	3.6	1.66
9	4	29	29	3	32	0	0		Service Time Distribution					10	13.3333	5.57333
10	0	29	32	3	35	3	1		1	0.25	0	0.25		11	6.66	2.85333
11	5	34	35	3	38	1	1		2	0.2	0.25	0.45		12	1.83333	0.96
12	3	37	38	4	42	1	1		3	0.4	0.45	0.85		13	2.42	1.26667
13	3	40	42	2	44	2	1		4	0.15	0.85	1		14	3.88	1.82
14	1	41	44	1	45	3	2							15	2.73333	1.28
15	4	45	45	3	48	0	0		Based on 1 replication:					16	1.30667	0.646667
16	3	48	48	1	49	0	0		Average wait time =			1.64		17	6.99333	2.86667
17	3	51	51	3	54	0	0		Average queue length =			0.86		18	1.98667	0.933333
18	3	54	54	4	58	0	0							19	3.11333	1.48667
19	3	57	58	3	61	1	1		Based on 200 replications:					20	1.34	0.72
20	4	61	61	3	64	0	0		Average wait time =			4.82087		21	3.20667	1.49333
21	3	64	64	4	68	0	0		Average queue length =			2.14357		22	3.60667	1.58667
22	1	65	68	1	69	3	1							23	4.21333	1.82
23	4	69	69	2	71	0	0							24	4.02667	1.9
24	4	73	73	2	75	0	0							25	4.80667	2.09333
25	4	77	77	4	81	0	0							26	4.8	2.25333
26	4	81	81	3	84	0	0							27	4.40667	2.06
27	3	84	84	3	87	0	0							28	11.0333	4.3
28	3	87	87	3	90	0	0							29	5.04667	2.26667
29	1	88	90	4	94	2	1							30	2.00667	0.966667
30	1	89	94	3	97	5	2							31	3.15333	1.45333
31	4	93	97	3	100	4	2							32	2.68	1.31333
32	0	93	100	4	104	7	3							33	5.92	2.62
33	3	96	104	1	105	8	3							34	3.78	1.76667
34	4	100	105	4	109	5	2							35	2.52667	1.22
35	1	101	109	2	111	8	3							36	2.64	1.20667
36	3	104	111	3	114	7	3							37	3.52667	1.73333
37	0	104	114	3	117	10	4							38	1.29333	0.693333
38	3	107	117	3	120	10	4							39	11.9333	5.16667
39	3	110	120	1	121	10	4							40	2.04	1.04
40	3	113	121	1	122	8	4							41	3.37333	1.60667
41	4	117	122	2	124	5	3							42	5.8	2.50667
42	4	121	124	3	127	3	2							43	4.79333	2.1
43	3	124	127	3	130	3	1							44	15.96	6.70667
44	3	127	130	3	133	3	1							45	1.64667	0.82
45	2	129	133	3	136	4	2							46	3.6	1.57333
46	5	134	136	4	140	2	1							47	3.28667	1.66667
47	4	138	140	1	141	2	1							48	2.18	1.10667
48	3	141	141	4	145	0	0							49	7.28	3.14
49	4	145	145	4	149	0	0							50	7.60667	3.24
50	3	148	149	3	152	1	1							51	1.98	1
51	3	151	152	2	154	1	1							52	3.32667	1.47333
52	0	151	154	3	157	3	2							53	6.69333	2.88
53	3	154	157	3	160	3	1							54	5.74667	2.34667
54	5	159	160	1	161	1	1							55	4.14	1.95333
55	4	163	163	3	166	0	0							56	2.6	1.30667
56	3	166	166	3	169	0	0							57	8.83333	3.82667
57	1	167	169	3	172	2	1							58	4.97333	2.17333
58	3	170	172	3	175	2	1							59	7.04667	3.04
59	4	174	175	2	177	1	1							60	4.50667	2.20667
60	4	178	178	1	179	0	0							61	2.76667	1.39333
61	3	181	181	3	184	0	0							62	10.54	4.57333
62	1	182	184	2	186	2	1							63	2.81333	1.34667
63	1	183	186	2	188	3	2							64	7.25333	2.94
64	4	187	188	3	191	1	1							65	7.88667	3.47333
65	4	191	191	2	193	0	0							66	2.27333	1.2
66	3	194	194	3	197	0	0							67	3.95333	1.86
67	0	194	197	3	200	3	1							68	3	1.38667
68	4	198	200	1	201	2	1							69	3.04	1.43333
69	3	201	201	1	202	0	0							70	3.06	1.4
70	3	204	204	3	207	0	0							71	9.56667	3.92
71	2	206	207	3	210	1	1							72	16.98	6.96667
72	0	206	210	1	211	4	2							73	6.14667	2.86
73	3	209	211	1	212	2	2							74	4.92667	2.23333
74	0	209	212	3	215	3	3							75	9.63333	4.07333
75	3	212	215	2	217	3	1							76	7.20667	3.08667
76	3	215	217	3	220	2	1							77	4.62	2.12667
77	4	219	220	1	221	1	1							78	3.03333	1.52
78	0	219	221	3	224	2	2							79	6.11333	2.73333
79	4	223	224	2	226	1	1							80	6.28667	2.78667
80	3	226	226	3	229	0	0							81	2.18667	0.98
81	1	227	229	4	233	2	1							82	9.58	3.94
82	4	231	233	3	236	2	1							83	4.12667	1.84667
83	3	234	236	2	238	2	1							84	3.73333	1.63333
84	4	238	238	2	240	0	0							85	11.9133	5.02667
85	3	241	241	3	244	0	0							86	3.29333	1.54667
86	3	244	244	1	245	0	0							87	7.25333	3.12667
87	3	247	247	1	248	0	0							88	1.9	1.02
88	5	252	252	1	253	0	0							89	2.07333	0.993333
89	3	255	255	2	257	0	0							90	11.1	4.54667
90	4	259	259	3	262	0	0							91	3.09333	1.37333
91	4	263	263	2	265	0	0							92	2.6	1.21333
92	2	265	265	4	269	0	0							93	2.08	0.96
93	3	268	269	3	272	1	1							94	9.29333	3.95333
94	1	269	272	2	274	3	1							95	2.71333	1.33333
95	2	271	274	3	277	3	2							96	4.02	1.86667
96	3	274	277	1	278	3	1							97	3.39333	1.65333
97	1	275	278	1	279	3	2							98	7.07333	3.24667
98	4	279	279	3	282	0	0							99	6.96667	2.98
99	5	284	284	1	285	0	0							100	2.56	1.19333
100	0	284	285	2	287	1	1							101	3.42667	1.48
101	2	286	287	2	289	1	1							102	4.16	1.88
102	1	287	289	1	290	2	1							103	6.26667	2.62
103	4	291	291	1	292	0	0							104	3.21333	1.54667
104	4	295	295	1	296	0	0							105	9.58	4.17333
105	1	296	296	3	299	0	0							106	11.04	4.83333
106	1	297	299	4	303	2	1							107	9.04	3.70667
107	3	300	303	3	306	3	1							108	7.42667	3.38
108	3	303	306	1	307	3	1							109	2.48	1.18667
109	1	304	307	1	308	3	2							110	6.00667	2.49333
110	1	305	308	3	311	3	3							111	11.22	4.75333
111	3	308	311	3	314	3	1							112	4.02667	1.8
112	5	313	314	1	315	1	1							113	3.17333	1.43333
113	0	313	315	1	316	2	2							114	2.14667	1.07333
114	4	317	317	1	318	0	0							115	6.44667	2.86667
115	3	320	320	1	321	0	0							116	3.90667	1.78667
116	4	324	324	1	325	0	0							117	10.46	4.50667
117	3	327	327	1	328	0	0							118	2.76	1.30667
118	0	327	328	3	331	1	1							119	1.55333	0.806667
119	1	328	331	3	334	3	1							120	2.17333	1.09333
120	3	331	334	3	337	3	1							121	1.84	0.92
121	4	335	337	3	340	2	1							122	4.12667	1.86
122	3	338	340	4	344	2	1							123	1.95333	0.966667
123	4	342	344	3	347	2	1							124	4.77333	2.24667
124	3	345	347	1	348	2	1							125	3.34	1.55333
125	4	349	349	4	353	0	0							126	14.4067	5.88
126	2	351	353	3	356	2	1							127	3.23333	1.54
127	3	354	356	1	357	2	1							128	4.11333	1.89333
128	4	358	358	2	360	0	0							129	3.08667	1.43333
129	3	361	361	2	363	0	0							130	4.59333	2.18
130	4	365	365	1	366	0	0							131	1.75333	0.933333
131	0	365	366	2	368	1	1							132	6.91333	3.07333
132	4	369	369	1	370	0	0							133	4.18667	1.82667
133	3	372	372	2	374	0	0							134	6.37333	2.60667
134	4	376	376	3	379	0	0							135	3.87333	1.61333
135	1	377	379	2	381	2	1							136	3.32667	1.47333
136	4	381	381	1	382	0	0							137	6.19333	2.66667
137	3	384	384	1	385	0	0							138	3.68667	1.72667
138	4	388	388	1	389	0	0							139	3.56	1.67333
139	1	389	389	3	392	0	0							140	6.92	2.94
140	3	392	392	3	395	0	0							141	4.48667	2.02667
141	4	396	396	1	397	0	0							142	2.57333	1.32
142	2	398	398	3	401	0	0							143	2.95333	1.33333
143	1	399	401	2	403	2	1							144	4.50667	1.98667
144	0	399	403	1	404	4	2							145	2.81333	1.36
145	3	402	404	4	408	2	2							146	4.86	2.24
146	4	406	408	3	411	2	1							147	1.92	0.92
147	2	408	411	1	412	3	1							148	1.94667	0.973333
148	1	409	412	1	413	3	2							149	4.55333	2.10667
149	4	413	413	2	415	0	0							150	7.88	3.28667
150	3	416	416	1	417	0	0							151	5.46	2.46667
														152	17.02	6.7
														153	1.15333	0.626667
														154	12.5	5.17333
														155	4.96667	2.27333
														156	2.18667	1.04667
														157	4.07333	1.87333
														158	5.3	2.37333
														159	7.52667	3.13333
														160	10.4933	4.45333
														161	2.82667	1.25333
														162	15.3133	6.10667
														163	4.26	1.92667
														164	2.38667	1.08667
														165	3.22	1.52667
														166	5.58	2.52
														167	1.08	0.593333
														168	3.06	1.52
														169	4.12	1.80667
														170	2.54	1.31333
														171	1.32667	0.733333
														172	5.92	2.51333
														173	6.58667	2.91333
														174	4.36	1.86
														175	1.58	0.806667
														176	3.43333	1.57333
														177	4.64	2.07333
														178	5.72	2.48667
														179	5.24	2.41333
														180	3.68667	1.57333
														181	4.28	1.95333
														182	5.14	2.46
														183	4.74667	2.09333
														184	5.61333	2.43333
														185	3.09333	1.48667
														186	2.56667	1.18667
														187	4.48	2
														188	2.11333	1.05333
														189	2.86667	1.49333
														190	2.08667	1.03333
														191	4.55333	1.99333
														192	1.93333	0.966667
														193	1.46667	0.793333
														194	9.50667	4.36667
														195	3.46	1.55333
														196	3.12	1.54
														197	6.58667	2.83333
														198	0.933333	0.533333
														199	5.31333	2.40667
														200	4.82	2.10667
