# Supplementary material
Source: publisher site journal article supplement (https://www.degruyterbrill.com/publication/isbn/9781501506208/downloadAsset/9781501506208_additional%20material.zip)
Supplement: Supplementary file 63 [file Figure 10.14.xlsx]

## Sheet: Figure 10.14
Judith's Limousine Service								Data Table
Calculations set to Manual. Press F9 to recalculate.
Judith's reservation limit	14		Van's passenger capacity =			10		Run	Profit	Occ rate
Reservations requested	7		Minimum reservation request =			7		1	220	0.8
Reservations accepted	7		Maximum reservation request =			14		2	180	1
Number show up	6		Probability person shows up			0.8		3	180	1
Number overbook	0		Reservation deposit amount =			10		4	170	0.6
Seats remaining	4		Balance of ticket price =			25		5	170	0.6
Number walk-up	2		Walk-up ticket price =			50		6	180	0.7
Walk-up accepted	2		Cost per overbooked person =			75		7	305	1
Total seats occupied	8		Fixed cost per trip =			100		8	170	0.7
Revenue	320							9	140	1
Cost	100		Walk-up Distribution					10	200	0.8
Profit	220		Number	Probability	RN intvl LL	RN intvl UL		11	265	0.9
Occupancy rate	0.8		0	0.3	0	0.3		12	240	0.9
			1	0.45	0.3	0.75		13	275	1
			2	0.25	0.75	1		14	145	0.6
								15	250	1
			Based on 200 replications:					16	230	1
			Average profit =			221.525		17	275	1
			Average occupancy rate =			0.891		18	295	0.9
								19	275	1
								20	275	1
								21	230	1
								22	285	1
								23	280	0.9
								24	265	1
								25	290	1
								26	195	0.8
								27	200	0.8
								28	265	0.9
								29	190	1
								30	115	0.5
								31	230	1
								32	240	1
								33	190	1
								34	260	0.9
								35	255	0.9
								36	190	1
								37	250	0.9
								38	220	1
								39	295	1
								40	230	0.8
								41	190	1
								42	225	0.8
								43	205	0.8
								44	130	1
								45	130	1
								46	225	0.7
								47	290	0.9
								48	215	0.9
								49	250	0.9
								50	265	1
								51	250	1
								52	180	0.7
								53	230	1
								54	240	1
								55	270	1
								56	180	1
								57	285	1
								58	280	1
								59	220	1
								60	145	0.6
								61	215	0.8
								62	280	0.9
								63	280	1
								64	230	1
								65	220	1
								66	245	0.9
								67	255	0.9
								68	270	1
								69	235	0.8
								70	140	1
								71	205	0.8
								72	265	1
								73	210	0.8
								74	180	1
								75	280	1
								76	240	0.8
								77	275	1
								78	250	1
								79	275	1
								80	310	1
								81	180	1
								82	220	0.8
								83	140	1
								84	230	0.9
								85	205	0.8
								86	190	0.8
								87	205	0.8
								88	175	0.7
								89	215	0.8
								90	240	0.9
								91	275	1
								92	225	0.8
								93	260	0.9
								94	145	0.7
								95	195	0.7
								96	190	1
								97	215	0.8
								98	130	1
								99	170	0.7
								100	300	1
								101	250	0.9
								102	145	0.5
								103	255	0.9
								104	270	1
								105	255	0.9
								106	240	1
								107	140	0.6
								108	280	1
								109	285	1
								110	205	0.8
								111	155	0.6
								112	190	1
								113	180	1
								114	220	1
								115	190	0.7
								116	190	1
								117	170	0.7
								118	260	0.9
								119	165	0.7
								120	280	1
								121	180	1
								122	290	1
								123	265	0.9
								124	180	1
								125	265	1
								126	280	1
								127	260	0.9
								128	280	1
								129	185	0.7
								130	295	1
								131	120	0.6
								132	230	1
								133	260	1
								134	280	1
								135	190	1
								136	140	1
								137	195	0.8
								138	245	0.9
								139	145	0.7
								140	290	1
								141	225	0.8
								142	260	1
								143	265	1
								144	280	1
								145	315	1
								146	130	0.6
								147	170	0.7
								148	120	0.5
								149	140	0.6
								150	230	0.8
								151	170	0.7
								152	45	0.3
								153	275	1
								154	210	1
								155	190	1
								156	180	1
								157	290	1
								158	220	1
								159	200	0.7
								160	140	0.6
								161	180	1
								162	270	1
								163	190	1
								164	260	1
								165	200	0.7
								166	245	0.9
								167	230	1
								168	275	1
								169	230	0.8
								170	240	1
								171	220	0.8
								172	215	0.9
								173	190	1
								174	180	1
								175	165	0.6
								176	240	1
								177	240	1
								178	180	1
								179	165	0.7
								180	130	0.6
								181	290	1
								182	170	1
								183	190	0.7
								184	220	1
								185	220	1
								186	295	1
								187	270	1
								188	195	0.8
								189	280	1
								190	145	0.5
								191	210	1
								192	195	0.7
								193	260	1
								194	240	1
								195	180	1
								196	290	1
								197	260	0.9
								198	215	0.8
								199	275	1
								200	220	0.8

## Sheet: Figure 10.15
	Scenario Summary
			Current Values:	R10	R11	R12	R13	R14
				Created by Raju Balakrishnan on 3/8/2005	Created by Raju Balakrishnan on 3/8/2005	Created by Raju Balakrishnan on 3/8/2005	Created by Raju Balakrishnan on 3/8/2005	Created by Raju Balakrishnan on 3/8/2005
	Changing Cells:
		$B$3	14	10	11	12	13	14
	Result Cells:
		$G$20	224.075	222.95	228.2	230.975	220.875	222.2
		$G$21	0.8605	0.82	0.838	0.8555	0.853	0.876
	Notes: Current Values column represents values of changing cells at
	time Scenario Summary Report was created. Changing cells for each
	scenario are highlighted in gray.
