# Supplementary material
Source: publisher site journal article supplement (https://www.degruyterbrill.com/publication/isbn/9781501506208/downloadAsset/9781501506208_additional%20material.zip)
Supplement: Supplementary file 64 [file Figure 10.17.xlsx]

## Sheet: Figure 10.17
Higgins Plumbing and Heating									Data Table
				Sales Distribution
Week	Sales	Stockout? (1 = Yes)		Sales	Prob-ability	RN intvl lower limit	RN intvl upper limit		Run	Avg sales	Stockout weeks
1	8	0		4	0.12	0	0.12		1	7.14423	24
2	8	0		5	0.1	0.12	0.22		2	6.80769	21
3	4	0		6	0.18	0.22	0.4		3	7.14423	23
4	9	1		7	0.24	0.4	0.64		4	6.94231	22
5	6	0		8	0.16	0.64	0.8		5	6.75	21
6	7	0		9	0.14	0.8	0.94		6	6.875	23
7	8	0		10	0.06	0.94	1		7	6.82692	21
8	7	0							8	7.02885	23
9	7	0		Supply each week =			8		9	6.83654	17
10	7	0							10	6.75962	23
11	9	1		(a)					11	6.75962	18
12	9	1		Based on 1 replication:					12	6.75962	21
13	8	0		Average sales =			7.14423		13	6.95192	23
14	9	1		No. of stockout weeks =			24		14	6.79808	18
15	8	0							15	6.76923	21
16	8	0		Based on 200 replications:					16	7.11538	25
17	9	1		Average sales =			6.89635		17	6.93269	20
18	9	1		P(>20 stockout weeks) =			0.545		18	6.76923	22
19	7	0							19	7.00962	20
20	9	1		(b)					20	6.65385	19
21	8	0		Expected sales =			6.88		21	6.95192	27
22	7	0							22	6.875	20
23	8	0		Calculations set to Manual.					23	7.02885	24
24	7	0		Press F9 to recalculate.					24	7.01923	28
25	7	0							25	7.08654	25
26	7	0							26	6.92308	23
27	7	0							27	7.15385	24
28	10	1							28	6.64423	17
29	7	0							29	7.00962	23
30	7	0							30	6.80769	19
31	7	0							31	7.08654	21
32	4	0							32	7.00962	23
33	9	1							33	6.78846	19
34	9	1							34	7	23
35	7	0							35	6.72115	20
36	6	0							36	6.77885	22
37	6	0							37	6.97115	15
38	7	0							38	6.84615	23
39	6	0							39	6.89423	25
40	9	1							40	7.15385	25
41	7	0							41	7.11538	23
42	5	0							42	6.56731	22
43	9	1							43	7.21154	26
44	4	0							44	6.98077	21
45	9	1							45	7.06731	28
46	9	1							46	7.13462	31
47	9	1							47	6.63462	14
48	8	0							48	6.69231	16
49	6	0							49	6.74038	19
50	8	0							50	6.90385	21
51	7	0							51	6.82692	18
52	4	0							52	6.91346	24
53	8	0							53	6.875	20
54	7	0							54	7.16346	26
55	9	1							55	6.68269	18
56	6	0							56	6.75	16
57	6	0							57	6.85577	15
58	7	0							58	7.05769	25
59	7	0							59	6.92308	21
60	6	0							60	6.46154	14
61	7	0							61	6.76923	20
62	9	1							62	6.875	22
63	5	0							63	6.99038	23
64	4	0							64	7.10577	31
65	9	1							65	7	18
66	7	0							66	6.96154	19
67	8	0							67	6.875	18
68	7	0							68	7.26923	29
69	4	0							69	7.14423	29
70	7	0							70	6.89423	19
71	6	0							71	7.00962	30
72	5	0							72	6.70192	19
73	5	0							73	7.34615	28
74	6	0							74	7.04808	26
75	8	0							75	6.90385	18
76	9	1							76	6.875	16
77	9	1							77	6.72115	15
78	6	0							78	7.18269	24
79	6	0							79	7	25
80	7	0							80	7.10577	28
81	8	0							81	6.92308	24
82	9	1							82	6.73077	18
83	9	1							83	6.72115	18
84	6	0							84	6.95192	22
85	6	0							85	6.90385	20
86	7	0							86	6.69231	12
87	8	0							87	6.85577	21
88	8	0							88	6.73077	19
89	6	0							89	6.94231	24
90	8	0							90	6.63462	12
91	6	0							91	7.16346	27
92	7	0							92	6.59615	15
93	5	0							93	6.86538	24
94	8	0							94	6.70192	17
95	9	1							95	7.07692	25
96	5	0							96	6.74038	22
97	5	0							97	6.73077	17
98	7	0							98	7.02885	27
99	7	0							99	7.16346	19
100	4	0							100	7.07692	22
101	9	1							101	6.71154	16
102	7	0							102	6.98077	22
103	7	0							103	6.99038	22
104	6	0							104	6.92308	26
									105	7.07692	21
									106	6.98077	20
									107	6.95192	19
									108	7.05769	26
									109	7.15385	26
									110	6.72115	18
									111	6.73077	21
									112	6.85577	22
									113	6.72115	21
									114	7.05769	27
									115	6.81731	21
									116	6.77885	20
									117	6.71154	21
									118	6.94231	26
									119	6.85577	16
									120	7.11538	24
									121	6.84615	19
									122	6.93269	20
									123	6.80769	16
									124	7.00962	22
									125	6.76923	17
									126	7.10577	28
									127	6.83654	20
									128	6.79808	23
									129	6.75962	18
									130	6.65385	19
									131	6.91346	21
									132	7.04808	22
									133	6.90385	16
									134	7.04808	22
									135	6.72115	18
									136	6.50962	12
									137	6.89423	19
									138	7.30769	30
									139	6.79808	13
									140	6.79808	16
									141	6.89423	20
									142	6.75	17
									143	7.00962	22
									144	7.30769	23
									145	6.49038	19
									146	6.71154	22
									147	6.74038	22
									148	6.97115	18
									149	6.63462	16
									150	6.60577	15
									151	6.75	20
									152	6.73077	16
									153	6.92308	25
									154	7.02885	26
									155	7.01923	23
									156	6.875	20
									157	7.09615	25
									158	6.99038	23
									159	7.03846	16
									160	7.23077	26
									161	7.06731	27
									162	6.91346	23
									163	7.03846	29
									164	6.79808	19
									165	6.91346	19
									166	6.58654	18
									167	6.88462	23
									168	7.20192	28
									169	7.13462	27
									170	6.74038	12
									171	6.80769	20
									172	6.74038	16
									173	6.875	20
									174	7.06731	25
									175	6.79808	19
									176	6.61538	19
									177	6.84615	21
									178	6.92308	25
									179	6.83654	16
									180	7.23077	25
									181	7.09615	25
									182	6.91346	23
									183	6.52885	16
									184	6.58654	18
									185	6.80769	18
									186	6.96154	22
									187	6.96154	19
									188	6.84615	19
									189	6.80769	24
									190	7.03846	22
									191	6.89423	21
									192	6.68269	18
									193	6.82692	20
									194	6.82692	18
									195	6.75	21
									196	6.81731	16
									197	6.99038	19
									198	6.78846	18
									199	6.83654	19
									200	6.94231	23
