# Supplementary material
Source: publisher site journal article supplement (https://www.degruyterbrill.com/publication/isbn/9781501506208/downloadAsset/9781501506208_additional%20material.zip)
Supplement: Supplementary file 65 [file Figure 10.18.xlsx]

## Sheet: Figure 10.18
Norris Medical Clinic												Data Table
Calculations set to Manual. Press F9 to recalculate.
Pati-ent #	Time between arrivals	Arrival time	Start service	Service time	End service	Wait time	Queue length					Run	% empty queue	Avg # patients	Avg wait time
0	0	0	0	0	0	0	0		Arrival Distribution			1	0.21	1.9	23.7056
1	3.95495	3.95495	3.95495	18.0453	22.0002	0	0		Exponential			2	0.22	2.32	30.0546
2	49.5771	53.532	53.532	6.21168	59.7437	0	0		Average arrival rate (per hour)	2.5		3	0.46	0.66	5.50137
3	5.14346	58.6755	59.7437	20.7334	80.4771	1.06822	1					4	0.51	0.87	9.71937
4	8.02565	66.7012	80.4771	13.796	94.2731	13.776	1		Service Time Distribution			5	0.41	1.17	13.3873
5	6.91463	73.6158	94.2731	21.0453	115.318	20.6573	2		Normal			6	0.45	0.72	6.20846
6	4.97011	78.5859	115.318	17.0521	132.37	36.7325	3		Mean service time (minutes)	15		7	0.53	0.65	6.71062
7	41.7224	120.308	132.37	14.5673	146.938	12.0622	1		Std dev of service time (minutes)	4		8	0.37	0.9	9.55433
8	8.45086	128.759	146.938	15.8494	162.787	18.1787	2		Minimum service time (minutes)	5		9	0.51	0.7	6.60114
9	28.6516	157.411	162.787	16.3686	179.156	5.37649	1					10	0.29	1.48	17.1563
10	12.5753	169.986	179.156	16.4393	195.595	9.16984	1		Based on 1 replication:			11	0.34	1.01	11.1279
11	3.52969	173.516	195.595	17.9116	213.507	22.0794	2		Percent of time the queue is empty =	0.21		12	0.54	0.53	4.35738
12	90.5208	264.036	264.036	17.779	281.815	0	0		Average number of patients in the queue =	1.9		13	0.43	0.95	10.8349
13	36.1941	300.231	300.231	10.4241	310.655	0	0		Average wait time per patient in the queue =	23.7056		14	0.42	1.05	12.785
14	1.97092	302.201	310.655	16.8454	327.5	8.45315	1					15	0.3	1.71	20.5644
15	1.90867	304.11	327.5	18.3125	345.812	23.3898	2		Based on 200 replications:			16	0.4	0.9	9.30606
16	20.8556	324.966	345.812	13.5116	359.324	20.8467	2		Percent of time the queue is empty =	0.38725		17	0.38	1.03	11.2012
17	1.93506	326.901	359.324	13.9452	373.269	32.4233	3		Average number of patients in the queue =	1.1275		18	0.41	0.86	8.82487
18	19.2247	346.125	373.269	18.7004	391.97	27.1437	2		Average wait time per patient in the queue =	12.6626		19	0.38	1.13	12.9408
19	15.4962	361.622	391.97	12.039	404.009	30.3479	2					20	0.37	0.88	8.14634
20	19.6947	381.316	404.009	12.1944	416.203	22.6922	2					21	0.41	1.03	11.3457
21	73.8959	455.212	455.212	11.428	466.64	0	0					22	0.47	0.73	8.21295
22	83.8246	539.037	539.037	14.6519	553.689	0	0					23	0.45	0.94	10.1192
23	1.08621	540.123	553.689	17.8492	571.538	13.5657	1					24	0.31	1.47	15.9908
24	10.9154	551.038	571.538	11.0823	582.62	20.4995	2					25	0.41	0.92	9.43682
25	27.1253	578.164	582.62	15.3398	597.96	4.45658	1					26	0.33	1.06	10.6297
26	89.1362	667.3	667.3	22.7974	690.097	0	0					27	0.46	0.77	7.16741
27	10.5702	677.87	690.097	8.08044	698.178	12.2272	1					28	0.37	1.04	11.5295
28	11.9154	689.785	698.178	16.7785	714.956	8.39225	2					29	0.5	0.77	7.9259
29	0.568762	690.354	714.956	12.1161	727.072	24.602	2					30	0.46	0.75	6.79708
30	37.9916	728.346	728.346	21.2614	749.607	0	0					31	0.36	1.14	12.3719
31	63.967	792.313	792.313	16.3344	808.647	0	0					32	0.42	1.31	16.1378
32	14.4704	806.783	808.647	27.3904	836.038	1.864	1					33	0.31	1.54	19.5459
33	29.215	835.998	836.038	16.4255	852.463	0.0394426	1					34	0.46	0.85	9.08686
34	15.0558	851.054	852.463	19.0145	871.478	1.40911	1					35	0.46	0.92	10.3866
35	5.42234	856.476	871.478	18.0249	889.503	15.0012	1					36	0.26	2.02	25.2866
36	46.5302	903.007	903.007	12.7369	915.743	0	0					37	0.45	0.82	8.76486
37	30.2748	933.281	933.281	12.8646	946.146	0	0					38	0.33	1.2	12.9004
38	1.34631	934.628	946.146	17.2019	963.348	11.5182	1					39	0.23	1.26	13.0019
39	18.7368	953.364	963.348	8.69834	972.046	9.98332	1					40	0.28	2.14	29.7572
40	64.2915	1017.66	1017.66	14.7204	1032.38	0	0					41	0.26	1.91	22.9127
41	23.8225	1041.48	1041.48	15.4941	1056.97	0	0					42	0.42	0.9	10.1623
42	0.497968	1041.98	1056.97	17.0063	1073.98	14.9961	1					43	0.39	1.06	11.4572
43	14.8752	1056.85	1073.98	9.3544	1083.33	17.1273	2					44	0.38	0.96	9.44908
44	20.4084	1077.26	1083.33	14.1424	1097.48	6.07337	1					45	0.43	0.83	8.94034
45	22.5016	1099.76	1099.76	23.2202	1122.98	0	0					46	0.26	1.42	16.3068
46	2.1021	1101.86	1122.98	9.57842	1132.56	21.1181	1					47	0.24	2.47	32.2397
47	11.8452	1113.71	1132.56	18.581	1151.14	18.8514	2					48	0.45	1.07	13.0943
48	16.6594	1130.37	1151.14	20.8973	1172.04	20.7729	2					49	0.45	0.9	9.46563
49	4.74956	1135.12	1172.04	10.5346	1182.57	36.9207	2					50	0.47	0.69	7.56138
50	2.97501	1138.09	1182.57	11.8633	1194.44	44.4803	3					51	0.3	1.54	18.3418
51	33.8455	1171.94	1194.44	11.9173	1206.35	22.498	3					52	0.43	0.83	8.56477
52	22.4358	1194.37	1206.35	16.2949	1222.65	11.9795	2					53	0.41	0.89	8.74046
53	18.0729	1212.45	1222.65	16.8368	1239.49	10.2015	1					54	0.31	1.57	19.8572
54	32.6235	1245.07	1245.07	13.3827	1258.45	0	0					55	0.39	0.87	8.75184
55	11.9197	1256.99	1258.45	15.9897	1274.44	1.46295	1					56	0.41	0.81	7.72694
56	2.48233	1259.47	1274.44	9.18023	1283.62	14.9703	1					57	0.43	1.16	13.5881
57	40.1279	1299.6	1299.6	13.6468	1313.25	0	0					58	0.42	0.8	8.48934
58	29.0909	1328.69	1328.69	12.5592	1341.25	0	0					59	0.27	1.5	17.8472
59	11.9366	1340.63	1341.25	14.3453	1355.6	0.622571	1					60	0.34	1.29	14.535
60	8.56394	1349.19	1355.6	15.4745	1371.07	6.40392	1					61	0.41	1.01	10.508
61	4.16108	1353.35	1371.07	14.2471	1385.32	17.7174	2					62	0.5	0.74	7.49535
62	2.51578	1355.87	1385.32	11.4992	1396.82	29.4487	2					63	0.24	1.33	14.4654
63	3.79237	1359.66	1396.82	18.3522	1415.17	37.1555	3					64	0.36	1.02	11.1257
64	7.24182	1366.9	1415.17	14.5345	1429.7	48.266	4					65	0.25	2.61	34.8497
65	50.5801	1417.48	1429.7	14.9293	1444.63	12.2203	1					66	0.37	1.03	11.6277
66	3.51678	1421	1444.63	22.9679	1467.6	23.6329	2					67	0.22	1.83	22.5353
67	12.8602	1433.86	1467.6	16.9079	1484.51	33.7406	2					68	0.4	0.9	9.71854
68	35.1721	1469.03	1484.51	14.2804	1498.79	15.4763	1					69	0.5	0.6	5.92981
69	17.4716	1486.5	1498.79	8.45263	1507.24	12.2851	1					70	0.38	1.18	13.2952
70	12.7746	1499.28	1507.24	22.5562	1529.8	7.96315	1					71	0.5	0.87	9.54924
71	6.40229	1505.68	1529.8	14.159	1543.96	24.117	2					72	0.42	1.06	11.1763
72	9.44621	1515.13	1543.96	17.6399	1561.6	28.8298	2					73	0.46	0.87	9.43857
73	7.10835	1522.24	1561.6	16.1894	1577.79	39.3613	3					74	0.38	0.99	9.83212
74	11.3552	1533.59	1577.79	12.7523	1590.54	44.1955	3					75	0.43	0.99	12.0262
75	43.6408	1577.23	1590.54	9.61226	1600.15	13.307	2					76	0.26	1.55	20.0168
76	63.5824	1640.81	1640.81	20.0847	1660.9	0	0					77	0.31	1.28	14.7996
77	12.8406	1653.65	1660.9	6.93294	1667.83	7.24403	1					78	0.44	0.8	7.84307
78	2.01509	1655.67	1667.83	15.5988	1683.43	12.1619	2					79	0.41	0.92	9.80056
79	29.7951	1685.46	1685.46	9.29819	1694.76	0	0					80	0.37	1.16	12.6395
80	56.4332	1741.9	1741.9	13.3086	1755.21	0	0					81	0.48	0.78	8.09232
81	14.8544	1756.75	1756.75	9.05913	1765.81	0	0					82	0.37	1.09	11.7484
82	0.0105262	1756.76	1765.81	17.5575	1783.37	9.0486	1					83	0.38	0.89	8.27136
83	2.39921	1759.16	1783.37	21.1676	1804.54	24.2069	2					84	0.37	1.16	13.5519
84	2.24105	1761.4	1804.54	16.4876	1821.02	43.1334	3					85	0.41	0.87	8.97754
85	9.61273	1771.02	1821.02	22.1056	1843.13	50.0083	3					86	0.36	1.15	13.5141
86	1.63794	1772.65	1843.13	16.0199	1859.15	70.476	4					87	0.48	0.85	9.64956
87	27.8898	1800.54	1859.15	19.7989	1878.95	58.606	4					88	0.55	0.62	6.45964
88	13.4021	1813.95	1878.95	11.3384	1890.29	65.0028	4					89	0.44	1.28	14.1909
89	1.77377	1815.72	1890.29	19.6324	1909.92	74.5675	5					90	0.37	1.18	12.7139
90	14.6051	1830.32	1909.92	11.4487	1921.37	79.5948	5					91	0.23	2.01	23.9093
91	35.3503	1865.67	1921.37	13.8857	1935.25	55.6932	4					92	0.37	1.29	14.5293
92	8.38605	1874.06	1935.25	12.942	1948.2	61.1928	5					93	0.35	1.29	16.1077
93	0.557088	1874.62	1948.2	18.987	1967.18	73.5777	6					94	0.46	0.73	6.42999
94	3.30037	1877.92	1967.18	17.5172	1984.7	89.2643	7					95	0.47	0.86	8.97689
95	20.9059	1898.82	1984.7	18.6837	2003.38	85.8757	6					96	0.51	0.66	7.03824
96	29.1717	1928	2003.38	14.9838	2018.37	75.3876	5					97	0.46	0.95	9.54861
97	6.05362	1934.05	2018.37	16.7565	2035.12	84.3178	6					98	0.41	0.94	9.31703
98	7.06654	1941.12	2035.12	19.2531	2054.38	94.0078	6					99	0.44	0.93	10.0727
99	24.6341	1965.75	2054.38	17.0508	2071.43	88.6268	6					100	0.4	1.3	15.9385
100	1.26012	1967.01	2071.43	14.1326	2085.56	104.418	7					101	0.46	0.77	7.54843
												102	0.51	0.85	10.72
												103	0.37	1.01	10.1153
												104	0.41	0.98	9.65767
												105	0.43	0.84	9.39212
												106	0.41	1	10.2412
												107	0.47	0.89	8.70783
												108	0.4	1.12	13.3713
												109	0.38	1.29	13.9697
												110	0.4	1.01	10.964
												111	0.43	0.82	7.87024
												112	0.52	0.68	7.00142
												113	0.27	1.9	23.0108
												114	0.37	1.4	16.2356
												115	0.44	0.77	7.3093
												116	0.41	0.79	7.0793
												117	0.39	1.04	11.4894
												118	0.32	1.53	18.6465
												119	0.42	1.07	11.8018
												120	0.37	1.12	12.5034
												121	0.26	2.53	33.7212
												122	0.35	1.07	10.495
												123	0.25	1.39	15.1668
												124	0.4	0.88	8.66606
												125	0.47	0.68	7.15623
												126	0.43	0.9	8.82449
												127	0.36	0.91	9.72378
												128	0.29	1.46	16.6311
												129	0.39	1	11.2194
												130	0.33	1.23	14.0724
												131	0.33	1	10.4713
												132	0.33	1.04	11.2703
												133	0.37	1.03	10.9647
												134	0.42	0.82	7.75311
												135	0.36	1.58	17.3604
												136	0.36	1.19	13.7357
												137	0.38	1.01	10.4701
												138	0.48	0.63	6.30706
												139	0.24	1.57	19.1687
												140	0.57	0.63	6.25451
												141	0.53	0.57	5.63883
												142	0.49	0.74	7.75889
												143	0.43	0.8	7.82366
												144	0.35	1.46	17.1393
												145	0.37	1.4	17.2996
												146	0.43	1.15	14.4573
												147	0.39	1.15	13.004
												148	0.35	1.04	10.5087
												149	0.35	1.02	10.4602
												150	0.45	0.81	8.36311
												151	0.43	1.1	12.0649
												152	0.35	1.31	14.4104
												153	0.22	2.23	27.8733
												154	0.35	1.25	14.1119
												155	0.22	1.67	19.9703
												156	0.39	1.16	13.4726
												157	0.38	1.3	16.6105
												158	0.42	1.21	14.2815
												159	0.34	1.65	20.3594
												160	0.4	1.04	11.6565
												161	0.44	0.84	9.18456
												162	0.26	1.84	22.1901
												163	0.51	0.57	4.49184
												164	0.35	2.08	27.1347
												165	0.27	1.97	25.2026
												166	0.41	1.03	11.2675
												167	0.37	1.37	16.4072
												168	0.31	1.22	13.0883
												169	0.51	0.93	10.8074
												170	0.48	0.7	6.65113
												171	0.31	1.14	12.9701
												172	0.46	0.86	8.99175
												173	0.3	1.44	16.3056
												174	0.45	0.78	7.27564
												175	0.36	1.19	12.6403
												176	0.36	1	10.0313
												177	0.25	1.48	17.0045
												178	0.35	1.1	12.0891
												179	0.4	1.06	11.8831
												180	0.49	0.72	7.79016
												181	0.49	0.7	6.82178
												182	0.36	1.04	10.9986
												183	0.4	0.81	7.33093
												184	0.32	1.2	13.6385
												185	0.21	1.42	15.6188
												186	0.33	1.51	17.5699
												187	0.45	1.22	14.2581
												188	0.27	1.55	17.6088
												189	0.33	1.05	12.2695
												190	0.36	1.02	10.4835
												191	0.46	0.77	7.9488
												192	0.31	1.72	21.3451
												193	0.46	0.89	8.39355
												194	0.39	0.92	9.8994
												195	0.57	0.61	6.33392
												196	0.41	1.51	17.7177
												197	0.45	0.76	7.27821
												198	0.48	0.74	6.37315
												199	0.23	2.62	35.1103
												200	0.3	1.49	16.9579
