# Supplementary material
Source: publisher site journal article supplement (https://www.degruyterbrill.com/publication/isbn/9781501506208/downloadAsset/9781501506208_additional%20material.zip)
Supplement: Supplementary file 66 [file Figure 10.19.xlsx]

## Sheet: Figure 10.19
Heartbreak Hotel													Data Table
Calculations set to Manual. Press F9 to recalculate.								No-Shows Distribution
Day	No-shows	Short rooms	Short cost	Vacant rooms	Vacant cost	Total cost		No-shows	Probability	RN intvl lower limit	RN intvl upper limit		Run	Cost
1	5	0	0	2	100	100		0	0.1	0	0.1		1	140
2	4	0	0	1	50	50		1	0.13	0.1	0.23		2	122.5
3	4	0	0	1	50	50		2	0.31	0.23	0.54		3	94.1667
4	2	1	125	0	0	125		3	0.16	0.54	0.7		4	140
5	1	2	250	0	0	250		4	0.21	0.7	0.91		5	101.667
6	4	0	0	1	50	50		5	0.09	0.91	1		6	103.333
7	1	2	250	0	0	250							7	79.1667
8	3	0	0	0	0	0		Rooms overbooked		3			8	135.833
9	2	1	125	0	0	125							9	104.167
10	2	1	125	0	0	125		Cost per room short		125			10	125
11	5	0	0	2	100	100		Cost per room vacant		50			11	108.333
12	1	2	250	0	0	250							12	126.667
13	2	1	125	0	0	125		Based on 1 replication:					13	142.5
14	5	0	0	2	100	100		Average daily cost =		140			14	137.5
15	2	1	125	0	0	125							15	115
16	3	0	0	0	0	0		Based on 200 replications:					16	134.167
17	0	3	375	0	0	375		Average daily cost =		130.354			17	94.1667
18	2	1	125	0	0	125							18	100
19	4	0	0	1	50	50							19	133.333
20	2	1	125	0	0	125							20	134.167
21	1	2	250	0	0	250							21	143.333
22	2	1	125	0	0	125							22	120.833
23	4	0	0	1	50	50							23	152.5
24	0	3	375	0	0	375							24	131.667
25	5	0	0	2	100	100							25	121.667
26	3	0	0	0	0	0							26	125.833
27	1	2	250	0	0	250							27	140.833
28	0	3	375	0	0	375							28	145
29	4	0	0	1	50	50							29	109.167
30	2	1	125	0	0	125							30	129.167
													31	148.333
													32	135.833
													33	133.333
													34	137.5
													35	142.5
													36	122.5
													37	125
													38	132.5
													39	121.667
													40	140
													41	139.167
													42	123.333
													43	156.667
													44	120.833
													45	146.667
													46	115
													47	147.5
													48	135.833
													49	178.333
													50	107.5
													51	118.333
													52	114.167
													53	145
													54	121.667
													55	142.5
													56	137.5
													57	105.833
													58	124.167
													59	153.333
													60	115
													61	119.167
													62	135.833
													63	127.5
													64	154.167
													65	153.333
													66	143.333
													67	156.667
													68	173.333
													69	146.667
													70	159.167
													71	153.333
													72	140.833
													73	105.833
													74	124.167
													75	114.167
													76	134.167
													77	111.667
													78	119.167
													79	120.833
													80	110
													81	121.667
													82	115.833
													83	150.833
													84	93.3333
													85	134.167
													86	138.333
													87	123.333
													88	115.833
													89	110.833
													90	143.333
													91	125
													92	165
													93	136.667
													94	120
													95	155.833
													96	91.6667
													97	177.5
													98	104.167
													99	124.167
													100	140
													101	137.5
													102	95
													103	125
													104	126.667
													105	126.667
													106	132.5
													107	125
													108	100
													109	129.167
													110	145
													111	170.833
													112	180
													113	112.5
													114	140
													115	146.667
													116	126.667
													117	91.6667
													118	144.167
													119	158.333
													120	155.833
													121	79.1667
													122	143.333
													123	114.167
													124	125
													125	122.5
													126	115.833
													127	140
													128	103.333
													129	126.667
													130	117.5
													131	146.667
													132	99.1667
													133	144.167
													134	123.333
													135	117.5
													136	124.167
													137	125
													138	135
													139	103.333
													140	162.5
													141	141.667
													142	104.167
													143	155
													144	157.5
													145	169.167
													146	172.5
													147	135
													148	148.333
													149	134.167
													150	124.167
													151	109.167
													152	176.667
													153	142.5
													154	86.6667
													155	148.333
													156	116.667
													157	125
													158	127.5
													159	134.167
													160	171.667
													161	123.333
													162	120.833
													163	120.833
													164	140
													165	126.667
													166	146.667
													167	116.667
													168	123.333
													169	138.333
													170	105
													171	165.833
													172	141.667
													173	120.833
													174	95.8333
													175	131.667
													176	163.333
													177	109.167
													178	97.5
													179	130
													180	117.5
													181	101.667
													182	109.167
													183	130.833
													184	133.333
													185	117.5
													186	165
													187	102.5
													188	105
													189	138.333
													190	106.667
													191	177.5
													192	138.333
													193	127.5
													194	163.333
													195	115.833
													196	136.667
													197	115
													198	168.333
													199	141.667
													200	154.167

## Sheet: Figure 10.20
	Scenario Summary
			Current Values:	OB0	OB1	OB2	OB3	OB4	OB5
				Overbook = 0	Overbook = 1	Overbook = 2	Overbook = 3	Overbook = 4	Overbook = 5
	Changing Cells:
		$K$11	3	0	1	2	3	4	5
	Result Cells:
		$K$20	128.421	125.792	93.3792	83.5542	128.296	204.383	304.688
	Notes: Current Values column represents values of changing cells at
	time Scenario Summary Report was created. Changing cells for each
	scenario are highlighted in gray.
