# Supplementary material
Source: publisher site journal article supplement (https://www.degruyterbrill.com/publication/isbn/9781501506208/downloadAsset/9781501506208_additional%20material.zip)
Supplement: Supplementary file 67 [file Figure 10.2.xlsx]

## Sheet: Figure 10.2
Demand	Probability	Lower limit of random number interval	Upper limit of random number interval
300	0.05	0	0.05
320	0.1	0.05	0.15
340	0.2	0.15	0.35
360	0.3	0.35	0.65
380	0.25	0.65	0.9
400	0.1	0.9	1
Random number =		0.714503
Simulated demand =		380

## Sheet: Figure 10.3
Demand	Probability	Lower limit of random number interval	Upper limit of random number interval
300	0.05	0	0.05
320	0.1	0.05	0.15
340	0.2	0.15	0.35
360	0.3	0.35	0.65
380	0.25	0.65	0.9
400	0.1	0.9	1
Random number =		0.714503
Simulated demand =		380
Calculations set to Manual. Press F9 to recalculate.
