# Supplementary material
Source: publisher site journal article supplement (https://www.degruyterbrill.com/publication/isbn/9781501506208/downloadAsset/9781501506208_additional%20material.zip)
Supplement: Supplementary file 68 [file Figure 10.22.xlsx]

## Sheet: CB_DATA_
															#NAME?

## Sheet: Figure 10.22
General Foundry's Project												Data Table
Calculations set to Manual. Press F9 to recalculate.
Activity	Description	Immed. pred.	Optimistic time (a)	Most likely time (m)	Pessimistic time (b)	Expected Time	St. Dev. Time	Activity time	Start time	Finish time		Run	Finish Time
A	Build internal components	—	1	2	3	2	0.333333	2.13	0	2.13		1	17.08
B	Modify roof and floor	—	2	3	4	3	0.333333	3.56	0	3.56		2	15.87
C	Construct collection stack	A	1	2	3	2	0.333333	2.64	2.13	4.77		3	15.61
D	Pour concrete and install frame	A, B	2	4	6	4	0.666667	3.79	3.56	7.35		4	15.76
E	Build high-temperature burner	C	1	4	7	4	1	3.71	4.77	8.48		5	19.02
F	Install pollution control system	C	1	2	9	3	1.33333	3.5	4.77	8.27		6	17.4
G	Install air pollution device	D, E	3	4	11	5	1.33333	6.73	8.48	15.21		7	16.32
H	Inspect and test	F, G	1	2	3	2	0.333333	1.87	15.21	17.08		8	16.82
												9	13.54
	Average Completion Time (Weeks) =		15.184									10	13.71
	P(Completion Time <= 16 Weeks) =		0.7									11	15.05
												12	15.35
												13	17.32
												14	17
												15	16.36
												16	13.29
												17	16.81
												18	12.2
												19	15.14
												20	15.23
												21	15.68
												22	15.09
												23	17.2
												24	14.57
												25	17.62
												26	12.96
												27	14.97
												28	13.7
												29	14.06
												30	15.34
												31	15.58
												32	15.74
												33	15.42
												34	15.65
												35	12.93
												36	14.24
												37	13.1
												38	18.3
												39	14.89
												40	13.6
												41	17.56
												42	14.41
												43	11.8
												44	15.91
												45	15.73
												46	16.22
												47	15.68
												48	14.34
												49	14.47
												50	14.65
												51	13.23
												52	13.31
												53	12.48
												54	12.89
												55	10.7
												56	10.28
												57	16.11
												58	12.63
												59	18.14
												60	14.28
												61	15.64
												62	13.21
												63	15.49
												64	14.56
												65	15.49
												66	13.57
												67	15.19
												68	15.02
												69	17.42
												70	14.29
												71	11.98
												72	12.18
												73	15.85
												74	14.53
												75	17.07
												76	15.64
												77	14.82
												78	14.26
												79	12.88
												80	13.03
												81	14.96
												82	14.3
												83	16.33
												84	15.62
												85	15.05
												86	15.39
												87	16.32
												88	15.21
												89	14.11
												90	13.54
												91	13.13
												92	14.35
												93	18.06
												94	16.05
												95	15.21
												96	16.72
												97	18.72
												98	19.52
												99	12.2
												100	17.01
												101	15.39
												102	16.47
												103	13.51
												104	15.19
												105	18.52
												106	14.75
												107	15.16
												108	14.91
												109	12.05
												110	12.22
												111	14.17
												112	15.97
												113	15
												114	14.77
												115	16.7
												116	15.6
												117	15.07
												118	16.96
												119	14.94
												120	16.92
												121	15.94
												122	13.21
												123	14.5
												124	15.42
												125	14.54
												126	14.19
												127	16.56
												128	13.63
												129	15.73
												130	17.69
												131	17.49
												132	16.52
												133	17.53
												134	14.93
												135	14.71
												136	17.88
												137	17.12
												138	12.67
												139	14.43
												140	15.26
												141	14.83
												142	16.01
												143	17.35
												144	14.76
												145	13.3
												146	16.18
												147	16.44
												148	13.89
												149	15.96
												150	16.74
												151	16.88
												152	13.82
												153	18.07
												154	13.73
												155	15.12
												156	15.67
												157	17.28
												158	14.79
												159	18.9
												160	14.76
												161	16.78
												162	15.07
												163	16.48
												164	16.22
												165	12.94
												166	15.16
												167	16.3
												168	16.51
												169	13.85
												170	15.45
												171	16.67
												172	18.02
												173	13.09
												174	17.61
												175	15.17
												176	17.91
												177	14.85
												178	15.26
												179	17.8
												180	16.89
												181	12.67
												182	14.21
												183	14.58
												184	14.85
												185	14.61
												186	13.02
												187	14.75
												188	12.22
												189	14.36
												190	15.57
												191	14.37
												192	13.09
												193	16.53
												194	12.93
												195	15.37
												196	15.4
												197	13.22
												198	17.56
												199	13.47
												200	13.03
