# Supplementary material
Source: publisher site journal article supplement (https://www.degruyterbrill.com/publication/isbn/9781501506208/downloadAsset/9781501506208_additional%20material.zip)
Supplement: Supplementary file 69 [file Figure 10.5.xlsx]

## Sheet: Figure 10.5
Harry's Auto Shop
								Demand Distribution
RN 1	Demand	Selling price	RN 2	Profit margin	Fixed cost	Profit		Demand	Proba-bility	RN intvl lower limit	RN intvl upper limit
0.496809	360	67	0.736203	0.27362	2000	4599.72		300	0.05	0	0.05
								320	0.1	0.05	0.15
								340	0.2	0.15	0.35
								360	0.3	0.35	0.65
								380	0.25	0.65	0.9
								400	0.1	0.9	1

## Sheet: Figure 10.6
Harry's Auto Shop
Calculations set to Manual. Press F9 to recalculate.								Demand Distribution
RN 1	Demand	Selling price	RN 2	Profit margin	Fixed cost	Profit		Demand	Proba-bility	RN intvl lower limit	RN intvl upper limit
0.00116007	300	72	0.835891	0.283589	2000	4125.52		300	0.05	0	0.05
								320	0.1	0.05	0.15
								340	0.2	0.15	0.35
								360	0.3	0.35	0.65
								380	0.25	0.65	0.9
								400	0.1	0.9	1

## Sheet: Figure 10.6 Alt
Harry's Auto Shop
Calculations set to Manual. Press F9 to recalculate.								Demand Distribution
RN 1	Demand	Selling price	RN 2	Profit margin	Fixed cost	Profit		Demand	Proba-bility	RN intvl lower limit	RN intvl upper limit
0.701041	380	62	0.45704	0.245704	2000	3788.79		300	0.05	0	0.05
0.801913	380	76	0.156033	0.215603	2001	4226.62		320	0.1	0.05	0.15
0.613507	360	69	0.605555	0.260555	2002	4472.2		340	0.2	0.15	0.35
0.362712	360	68	0.190564	0.219056	2003	3362.5		360	0.3	0.35	0.65
0.744929	380	63	0.164816	0.216482	2004	3182.57		380	0.25	0.65	0.9
0.869923	380	75	0.788329	0.278833	2005	5946.74		400	0.1	0.9	1
0.393243	360	65	0.674957	0.267496	2006	4259.4
0.965908	400	68	0.375147	0.237515	2007	4460.4		Based on 200 replications:
0.532873	360	71	0.285653	0.228565	2008	3842.13		Average monthly profit =			4389.96
0.610994	360	76	0.926403	0.29264	2009	6006.64
0.414191	360	80	0.0530079	0.205301	2010	3912.66
0.802149	380	62	0.0024464	0.200245	2011	2717.76
0.237436	340	61	0.256407	0.225641	2012	2679.79
0.380339	360	70	0.243584	0.224358	2013	3653.83
0.449612	360	77	0.00297268	0.200297	2014	3552.24
0.406034	360	78	0.443843	0.244384	2015	4862.31
0.194441	340	77	0.597629	0.259763	2016	4800.59
0.529617	360	72	0.45665	0.245665	2017	4367.64
0.97164	400	74	0.906412	0.290641	2018	6602.98
0.0805554	320	67	0.915343	0.291534	2019	4250.49
0.79115	380	61	0.964547	0.296455	2020	4871.82
0.0289503	300	71	0.614554	0.261455	2021	3569
0.742101	380	68	0.810282	0.281028	2022	5261.77
0.988935	400	71	0.892698	0.28927	2023	6215.26
0.396919	360	67	0.894024	0.289402	2024	4980.39
0.424947	360	72	0.287206	0.228721	2025	3928.44
0.860888	380	80	0.347123	0.234712	2026	5135.25
0.307928	340	67	0.234728	0.223473	2027	3090.71
0.477098	360	76	0.813195	0.281319	2028	5696.9
0.599224	360	63	0.866557	0.286656	2029	4501.35
0.66584	380	68	0.584346	0.258435	2030	4677.95
0.0701457	320	62	0.515959	0.251596	2031	2991.66
0.443355	360	68	0.646836	0.264684	2032	4479.45
0.78353	380	65	0.541055	0.254105	2033	4276.41
0.910192	400	64	0.379301	0.23793	2034	4091.01
0.331086	340	76	0.21723	0.221723	2035	3729.32
0.631152	360	75	0.970932	0.297093	2036	6021.52
0.733911	380	79	0.0594225	0.205942	2037	4182.39
0.800161	380	72	0.643644	0.264364	2038	5233.01
0.435957	360	75	0.146898	0.21469	2039	3796.62
0.892881	380	64	0.303359	0.230336	2040	3601.77
0.497907	360	63	0.535436	0.253544	2041	3750.37
0.723696	380	73	0.196555	0.219655	2042	4093.24
0.575776	360	79	0.304294	0.230429	2043	4553.41
0.683771	380	71	0.264395	0.22644	2044	4109.34
0.836914	380	71	0.764408	0.276441	2045	5458.37
0.463523	360	69	0.988112	0.298811	2046	5422.47
0.456201	360	71	0.381298	0.23813	2047	4086.6
0.941133	400	61	0.15012	0.215012	2048	3246.29
0.539847	360	60	0.49249	0.249249	2049	3383.78
0.951906	400	78	0.532849	0.253285	2050	5902.49
0.322582	340	66	0.265362	0.226536	2051	3083.47
0.326815	340	78	0.847458	0.284746	2052	5551.46
0.0918982	320	75	0.240628	0.224063	2053	3377.51
0.415774	360	70	0.884448	0.288445	2054	5268.81
0.371826	360	79	0.069853	0.206985	2055	3886.66
0.237552	340	64	0.327641	0.232764	2056	3064.95
0.969484	400	70	0.524644	0.252464	2057	5069
0.73721	380	67	0.155605	0.21556	2058	3488.17
0.403878	360	74	0.844104	0.28441	2059	5576.69
0.152006	340	61	0.821713	0.282171	2060	3852.23
0.257626	340	67	0.53886	0.253886	2061	3783.52
0.355016	360	77	0.139257	0.213926	2062	3930.02
0.855684	380	78	0.0682496	0.206825	2063	4130.29
0.490621	360	72	0.0688002	0.20688	2064	3362.33
0.897696	380	70	0.0274413	0.202744	2065	3392.99
0.712109	380	77	0.0976755	0.209768	2066	4137.8
0.482568	360	70	0.847797	0.28478	2067	5176.45
0.428935	360	76	0.758996	0.2759	2068	5548.61
0.30977	340	69	0.51743	0.251743	2069	3905.89
0.891187	380	71	0.170841	0.217084	2070	3856.93
0.0411703	300	71	0.272844	0.227284	2071	2841.16
0.815889	380	61	0.439701	0.24397	2072	3655.23
0.513642	360	74	0.62798	0.262798	2073	5000.94
0.604619	360	63	0.0711606	0.207116	2074	2697.39
0.0791308	320	67	0.369045	0.236904	2075	3079.23
0.600531	360	60	0.704005	0.2704	2076	3840.65
0.244347	340	79	0.663128	0.266313	2077	5153.16
0.793676	380	79	0.749471	0.274947	2078	6253.91
0.765149	380	75	0.00517959	0.200518	2079	3714.76
0.0800974	320	77	0.0965211	0.209652	2080	3165.83
0.144609	320	68	0.246321	0.224632	2081	2887.99
0.330847	340	69	0.604943	0.260494	2082	4111.2
0.358488	360	79	0.79805	0.279805	2083	5957.65
0.858723	380	75	0.736084	0.273608	2084	5797.84
0.29011	340	67	0.741942	0.274194	2085	4246.14
0.82513	380	76	0.180831	0.218083	2086	4298.24
0.154086	340	70	0.233569	0.223357	2087	3315.89
0.0887749	320	61	0.285563	0.228556	2088	2461.42
0.728906	380	76	0.197863	0.219786	2089	4347.43
0.419081	360	60	0.707742	0.270774	2090	3848.72
0.949551	400	75	0.110327	0.211033	2091	4330.98
0.730789	380	65	0.973938	0.297394	2092	5345.63
0.254691	340	71	0.234507	0.223451	2093	3394.1
0.301011	340	69	0.43862	0.243862	2094	3721
0.896933	380	80	0.995123	0.299512	2095	7105.17
0.316155	340	63	0.660794	0.266079	2096	3699.42
0.864711	380	71	0.342242	0.234224	2097	4319.37
0.370847	360	66	0.605767	0.260577	2098	4191.3
0.44696	360	76	0.238042	0.223804	2099	4123.28
0.0185027	300	79	0.668416	0.266842	2100	4324.15
0.728617	380	80	0.813669	0.281367	2101	6553.55
0.253818	340	80	0.333445	0.233344	2102	4346.97
0.974473	400	70	0.868818	0.286882	2103	6032.69
0.868093	380	75	0.695795	0.26958	2104	5683.02
0.617663	360	65	0.825169	0.282517	2105	4610.89
0.19375	340	60	0.533918	0.253392	2106	3169.19
0.823511	380	79	0.126829	0.212683	2107	4384.74
0.802804	380	71	0.70431	0.270431	2108	5296.23
0.236561	340	70	0.780926	0.278093	2109	4618.6
0.684969	380	66	0.720941	0.272094	2110	4824.12
0.570564	360	75	0.986539	0.298654	2111	6063.66
0.0137558	300	66	0.67934	0.267934	2112	3305.09
0.00610487	300	63	0.355574	0.235557	2113	2452.03
0.300623	340	73	0.40928	0.240928	2114	3979.83
0.750859	380	68	0.124173	0.212417	2115	3488.86
0.711561	380	69	0.126126	0.212613	2116	3574.7
0.892433	380	76	0.176481	0.217648	2117	4285.68
0.431689	360	77	0.742992	0.274299	2118	5603.57
0.132185	320	68	0.109007	0.210901	2119	2589.2
0.765597	380	62	0.877148	0.287715	2120	4778.56
0.679723	380	76	0.207363	0.220736	2121	4374.86
0.723244	380	64	0.578824	0.257882	2122	4271.7
0.844686	380	78	0.300834	0.230083	2123	4819.67
0.697161	380	60	0.666197	0.26662	2124	4078.93
0.931516	400	73	0.610731	0.261073	2125	5623.33
0.201959	340	73	0.802753	0.280275	2126	4956.43
0.0488408	300	78	0.789318	0.278932	2127	4527
0.0992873	320	66	0.961244	0.296124	2128	4254.15
0.589113	360	78	0.652262	0.265226	2129	5447.55
0.0746664	320	70	0.546532	0.254653	2130	3704.23
0.700161	380	70	0.00814779	0.200815	2131	3341.67
0.230797	340	78	0.172913	0.217291	2132	3762.57
0.390435	360	74	0.405909	0.240591	2133	4409.34
0.641388	360	66	0.994084	0.299408	2134	5113.94
0.109462	320	64	0.0901727	0.209017	2135	2280.67
0.797429	380	75	0.444776	0.244478	2136	4967.61
0.357245	360	74	0.102648	0.210265	2137	3601.46
0.320171	340	72	0.242208	0.224221	2138	3488.93
0.937876	400	61	0.297176	0.229718	2139	3605.11
0.781299	380	67	0.797313	0.279731	2140	5121.96
0.622609	360	77	0.585099	0.25851	2141	5165.9
0.4721	360	74	0.908509	0.290851	2142	5748.27
0.675643	380	74	0.481799	0.24818	2143	4978.82
0.956477	400	76	0.515347	0.251535	2144	5646.66
0.436421	360	66	0.424562	0.242456	2145	3760.76
0.836314	380	73	0.090707	0.209071	2146	3799.62
0.0448604	300	76	0.550919	0.255092	2147	3816.09
0.78267	380	77	0.314027	0.231403	2148	4770.84
0.266013	340	75	0.292421	0.229242	2149	3845.67
0.0772337	320	75	0.331998	0.2332	2150	3596.79
0.760029	380	69	0.286128	0.228613	2151	3994.23
0.273677	340	80	0.68694	0.268694	2152	5308.48
0.647871	360	80	0.737021	0.273702	2153	5882.62
0.495139	360	80	0.281705	0.22817	2154	4571.31
0.834762	380	68	0.844243	0.284424	2155	5349.52
0.517632	360	78	0.0641972	0.20642	2156	3796.27
0.691656	380	80	0.611582	0.261158	2157	5939.21
0.562867	360	62	0.137597	0.21376	2158	2771.12
0.550336	360	61	0.433028	0.243303	2159	3342.93
0.978414	400	64	0.61569	0.261569	2160	4696.17
0.900276	400	77	0.790686	0.279069	2161	6595.31
0.53951	360	75	0.714569	0.271457	2162	5329.34
0.994247	400	74	0.984662	0.298466	2163	6834.6
0.574623	360	72	0.778849	0.277885	2164	5202.78
0.28303	340	77	0.903643	0.290364	2165	5601.74
0.886993	380	67	0.780359	0.278036	2166	5078.79
0.113333	320	65	0.905716	0.290572	2167	4043.89
0.244413	340	72	0.0384427	0.203844	2168	2990.11
0.757247	380	62	0.399554	0.239955	2169	3653.35
0.235671	340	75	0.742411	0.274241	2170	4993.15
0.425915	360	62	0.185892	0.218589	2171	2878.91
0.853777	380	63	0.926927	0.292693	2172	5007.06
0.564159	360	77	0.984651	0.298465	2173	6273.45
0.47334	360	78	0.959703	0.29597	2174	6310.84
0.450158	360	64	0.68942	0.268942	2175	4196.42
0.00271317	300	78	0.866475	0.286648	2176	4707.55
0.862544	380	65	0.320501	0.23205	2177	3731.64
0.8468	380	73	0.214813	0.221481	2178	4143.89
0.892641	380	77	0.981476	0.298148	2179	6723.8
0.291045	340	71	0.479956	0.247996	2180	3986.61
0.85751	380	77	0.0367396	0.203674	2181	3959.5
0.0313936	300	71	0.625553	0.262555	2182	3592.43
0.764882	380	62	0.677024	0.267702	2183	4307.07
0.260572	340	66	0.925144	0.292514	2184	4564.02
0.052625	320	60	0.583673	0.258367	2185	2960.65
0.468231	360	74	0.313374	0.231337	2186	4162.83
0.861254	380	72	0.532854	0.253285	2187	4929.89
0.371931	360	79	0.420032	0.242003	2188	4882.57
0.345558	340	79	0.630208	0.263021	2189	5064.74
0.488098	360	77	0.762809	0.276281	2190	5658.51
0.757752	380	61	0.862368	0.286237	2191	4634.97
0.528846	360	60	0.336969	0.233697	2192	3047.85
0.584496	360	71	0.792014	0.279201	2193	5136.39
0.576778	360	75	0.274038	0.227404	2194	4139.9
0.535699	360	66	0.641135	0.264114	2195	4275.34
0.802196	380	72	0.276879	0.227688	2196	4229.54
0.437158	360	71	0.197779	0.219778	2197	3617.52
0.597299	360	65	0.538058	0.253806	2198	3939.06
0.478482	360	68	0.64421	0.264421	2199	4473.03

## Sheet: Figure 10.7
Harry's Auto Shop													Data Table
Calculations set to Manual. Press F9 to recalculate.								Demand Distribution
RN 1	Demand	Selling price	RN 2	Profit margin	Fixed cost	Profit		Demand	Proba-bility	RN intvl lower limit	RN intvl upper limit		Run	Profit
0.274373	340	77	0.893034	0.289303	2000	5573.96		300	0.05	0	0.05		1	5573.96
								320	0.1	0.05	0.15		2	4064.8
Based on 200 replications:								340	0.2	0.15	0.35		3	2991.6
Average monthly profit =						4320.06		360	0.3	0.35	0.65		4	7026.59
Standard deviation of profit =						1090.89		380	0.25	0.65	0.9		5	5427.41
Number of months with profit >= $4,000 =						113		400	0.1	0.9	1		6	3005.23
Probability that monthly profit >= $4,000 =						0.565							7	3324
													8	4647.34
													9	5248.72
													10	3440.91
													11	2326.83
													12	4922.52
													13	3641.65
													14	4023.24
													15	6606.72
													16	4729.49
													17	4387.89
													18	4266.21
													19	3923.65
													20	4085.12
													21	4290.65
													22	3260.31
													23	5223.04
													24	4193.02
													25	3291.27
													26	6095.83
													27	3967.97
													28	5263.39
													29	3032.74
													30	4966.58
													31	5064.73
													32	2142.59
													33	4304.86
													34	3745.71
													35	4094.31
													36	3191.92
													37	3930.73
													38	3926.1
													39	5420.86
													40	4121.55
													41	5761.18
													42	5588.77
													43	2293.64
													44	4169.12
													45	5332.14
													46	3179.58
													47	3710.65
													48	3431.77
													49	3220.85
													50	5667.82
													51	3471.24
													52	3525.89
													53	2972.89
													54	6511.87
													55	4394.28
													56	2289.24
													57	3555.23
													58	3202.04
													59	3861.23
													60	3067.39
													61	6568.04
													62	3672.44
													63	3996.23
													64	5066.75
													65	4818.05
													66	2945.24
													67	5802.05
													68	7180.58
													69	3656.19
													70	5357.77
													71	4829.22
													72	4797.76
													73	3227.16
													74	3911.56
													75	6846.74
													76	5675.65
													77	5615.7
													78	2804.04
													79	2606.88
													80	3086.41
													81	4398.87
													82	4209.84
													83	3910.94
													84	3772.1
													85	3753.08
													86	2201.45
													87	3625.77
													88	4605.61
													89	3729.96
													90	4543.19
													91	6338.22
													92	3349.4
													93	6228.61
													94	3202.81
													95	4368.34
													96	3515.97
													97	2597.22
													98	6300.23
													99	4500.24
													100	4882.03
													101	3591.53
													102	2950.22
													103	4128
													104	4428.27
													105	2640.16
													106	2750.24
													107	5406.38
													108	4589.9
													109	5181.61
													110	4436.46
													111	3982.46
													112	5139.7
													113	6541.36
													114	5768.14
													115	3107.39
													116	4056.83
													117	6315.5
													118	3742.44
													119	4290.41
													120	5624.48
													121	4482.33
													122	6628.47
													123	5541.77
													124	4543.85
													125	4496.75
													126	4885.44
													127	4665.35
													128	6254.26
													129	4440.97
													130	4462.14
													131	4474.59
													132	6698.82
													133	3986.28
													134	3729.37
													135	4510.5
													136	4655.72
													137	3150.89
													138	3513.71
													139	6063.26
													140	3819.98
													141	4031.53
													142	3760.29
													143	3752.25
													144	3594.32
													145	3591.67
													146	4897.04
													147	4892.27
													148	3306.76
													149	5943.25
													150	4355.95
													151	6329.86
													152	4984.24
													153	3055.71
													154	3817.99
													155	4782.85
													156	3640.66
													157	3594.48
													158	2665.5
													159	2820.9
													160	4822.3
													161	3661.41
													162	4528.86
													163	2773.13
													164	4420.77
													165	3684.96
													166	5142.37
													167	5006.67
													168	4691.26
													169	3585.86
													170	6286.43
													171	2947.85
													172	3705.56
													173	5466.54
													174	3407.18
													175	5300.89
													176	3719.15
													177	4923.82
													178	4580.79
													179	4468.23
													180	4123.51
													181	2733.12
													182	4006.04
													183	4457.9
													184	5196.93
													185	3901.9
													186	2711.13
													187	2591.09
													188	5226.56
													189	3718.94
													190	4252.37
													191	3953.76
													192	3348.03
													193	4303.26
													194	4851.78
													195	5128.91
													196	3216.32
													197	5172.31
													198	5544.55
													199	5587.23
													200	4472.73

## Sheet: Figure 10.8
Profit
Mean	4320.06
Standard Error	77.1373
Median	4231.1
Mode	#N/A
Standard Deviation	1090.89
Sample Variance	1.19003e+06
Kurtosis	-0.342678
Skewness	0.393532
Range	5037.99
Minimum	2142.59
Maximum	7180.58
Sum	864013
Count	200
Confidence Level(95.0%)	152.112
