# Supplementary material
Source: publisher site journal article supplement (https://www.degruyterbrill.com/publication/isbn/9781501506208/downloadAsset/9781501506208_additional%20material.zip)
Supplement: Supplementary file 70 [file Figure 10.9.xlsx]

## Sheet: Figure 10.9
Simkin's Hardware Store
Calculations set to Manual. Press F9 to recalculate.																	Demand Distribution
Day	Begin inv	Units rec	Avail inv	Dem-and	Demand filled	End inv	Stockout	End inv + Order	Place order?	Lead time	Arrive on day	Hold-ing cost	Stock-out cost	Order cost	Total cost		Demand	Proba-bility	RN intvl lower limit	RN intvl upper limit
1	7	0	7	4	4	3	0	3	1	1	3	0.06	0	20	20.06		0	0.05	0	0.05
2	3	0	3	2	2	1	0	11	0	0	0	0.02	0	0	0.02		1	0.1	0.05	0.15
3	1	10	11	2	2	9	0	9	0	0	0	0.18	0	0	0.18		2	0.2	0.15	0.35
4	9	0	9	0	0	9	0	9	0	0	0	0.18	0	0	0.18		3	0.4	0.35	0.75
5	9	0	9	3	3	6	0	6	0	0	0	0.12	0	0	0.12		4	0.15	0.75	0.9
6	6	0	6	2	2	4	0	4	1	2	9	0.08	0	20	20.08		5	0.1	0.9	1
7	4	0	4	3	3	1	0	11	0	0	0	0.02	0	0	0.02
8	1	0	1	3	1	0	2	10	0	0	0	0	16	0	16		Order quantity, Q		10
9	0	10	10	3	3	7	0	7	0	0	0	0.14	0	0	0.14		Reorder point, R		5
10	7	0	7	3	3	4	0	4	1	1	12	0.08	0	20	20.08
11	4	0	4	4	4	0	0	10	0	0	0	0	0	0	0		Min leadtime		1
12	0	10	10	3	3	7	0	7	0	0	0	0.14	0	0	0.14		Max leadtime		3
13	7	0	7	2	2	5	0	5	1	3	17	0.1	0	20	20.1
14	5	0	5	3	3	2	0	12	0	0	0	0.04	0	0	0.04		Holding cost		0.02
15	2	0	2	1	1	1	0	11	0	0	0	0.02	0	0	0.02		(per unit per day)
16	1	0	1	3	1	0	2	10	0	0	0	0	16	0	16
17	0	10	10	1	1	9	0	9	0	0	0	0.18	0	0	0.18		Stockout cost		8
18	9	0	9	5	5	4	0	4	1	2	21	0.08	0	20	20.08		(per unit)
19	4	0	4	4	4	0	0	10	0	0	0	0	0	0	0
20	0	0	0	3	0	0	3	10	0	0	0	0	24	0	24		Order cost		20
21	0	10	10	3	3	7	0	7	0	0	0	0.14	0	0	0.14		(per order)
22	7	0	7	5	5	2	0	2	1	3	26	0.04	0	20	20.04
23	2	0	2	5	2	0	3	10	0	0	0	0	24	0	24
24	0	0	0	3	0	0	3	10	0	0	0	0	24	0	24
25	0	0	0	1	0	0	1	10	0	0	0	0	8	0	8
											Total per month =	1.62	112	120	233.62

## Sheet: Figure 10.10
Simkin's Hardware Store																						Data Table
Calculations set to Manual. Press F9 to recalculate.																	Demand Distribution
Day	Begin inv	Units rec	Avail inv	Dem-and	Demand filled	End inv	Stockout	End inv + Order	Place order?	Lead time	Arrive on day	Hold-ing cost	Stock-out cost	Order cost	Total cost		Demand	Proba-bility	RN intvl lower limit	RN intvl upper limit		Run	Hold-ing cost	Stock-out cost	Order cost	Total cost
1	7	0	7	0	0	7	0	7	0	0	0	0.14	0	0	0.14		0	0.05	0	0.05		1	1.46	104	140	245.46
2	7	0	7	5	5	2	0	2	1	1	4	0.04	0	20	20.04		1	0.1	0.05	0.15		2	2.46	16	140	158.46
3	2	0	2	4	2	0	2	10	0	0	0	0	16	0	16		2	0.2	0.15	0.35		3	1.28	128	120	249.28
4	0	10	10	3	3	7	0	7	0	0	0	0.14	0	0	0.14		3	0.4	0.35	0.75		4	1.9	56	140	197.9
5	7	0	7	4	4	3	0	3	1	3	9	0.06	0	20	20.06		4	0.15	0.75	0.9		5	1.46	120	120	241.46
6	3	0	3	0	0	3	0	13	0	0	0	0.06	0	0	0.06		5	0.1	0.9	1		6	1.72	88	120	209.72
7	3	0	3	2	2	1	0	11	0	0	0	0.02	0	0	0.02							7	1.58	96	120	217.58
8	1	0	1	4	1	0	3	10	0	0	0	0	24	0	24		Order quantity, Q		10			8	1.88	96	120	217.88
9	0	10	10	5	5	5	0	5	1	3	13	0.1	0	20	20.1		Reorder point, R		5			9	1.58	128	120	249.58
10	5	0	5	3	3	2	0	12	0	0	0	0.04	0	0	0.04							10	2.18	48	140	190.18
11	2	0	2	2	2	0	0	10	0	0	0	0	0	0	0		Min leadtime		1			11	1.9	88	120	209.9
12	0	0	0	3	0	0	3	10	0	0	0	0	24	0	24		Max leadtime		3			12	1.76	136	120	257.76
13	0	10	10	2	2	8	0	8	0	0	0	0.16	0	0	0.16							13	1.7	112	120	233.7
14	8	0	8	3	3	5	0	5	1	2	17	0.1	0	20	20.1		Holding cost		0.02			14	1.9	24	120	145.9
15	5	0	5	5	5	0	0	10	0	0	0	0	0	0	0		(per unit per day)					15	1.12	168	140	309.12
16	0	0	0	2	0	0	2	10	0	0	0	0	16	0	16							16	1.74	40	140	181.74
17	0	10	10	4	4	6	0	6	0	0	0	0.12	0	0	0.12		Stockout cost		8			17	1.88	80	120	201.88
18	6	0	6	5	5	1	0	1	1	1	20	0.02	0	20	20.02		(per unit)					18	1.44	152	120	273.44
19	1	0	1	4	1	0	3	10	0	0	0	0	24	0	24							19	1.4	104	140	245.4
20	0	10	10	5	5	5	0	5	1	1	22	0.1	0	20	20.1		Order cost		20			20	1.46	168	120	289.46
21	5	0	5	4	4	1	0	11	0	0	0	0.02	0	0	0.02		(per order)					21	1.78	112	120	233.78
22	1	10	11	3	3	8	0	8	0	0	0	0.16	0	0	0.16							22	1.8	96	140	237.8
23	8	0	8	2	2	6	0	6	0	0	0	0.12	0	0	0.12		Based on 200 replications:					23	2.04	80	120	202.04
24	6	0	6	3	3	3	0	3	1	3	28	0.06	0	20	20.06		Average holding cost =			1.7891		24	1.94	56	120	177.94
25	3	0	3	3	3	0	0	10	0	0	0	0	0	0	0		Average stockout cost =			98.64		25	1.84	168	120	289.84
											Total per month =	1.46	104	140	245.46		Average order cost =			122.2		26	2	80	120	202
																	Average total cost =			222.629		27	1.86	64	120	185.86
																						28	1.56	160	120	281.56
																						29	2.42	32	120	154.42
																						30	1.52	136	120	257.52
																						31	2.06	96	120	218.06
																						32	1.92	24	120	145.92
																						33	1.76	56	140	197.76
																						34	1.92	104	140	245.92
																						35	1.62	104	100	205.62
																						36	1.48	120	120	241.48
																						37	1.44	88	120	209.44
																						38	1.52	152	120	273.52
																						39	1.88	56	120	177.88
																						40	1.56	120	140	261.56
																						41	2	136	120	258
																						42	1.66	80	140	221.66
																						43	1.58	144	120	265.58
																						44	1.58	72	120	193.58
																						45	1.72	120	120	241.72
																						46	1.58	128	120	249.58
																						47	1.8	88	120	209.8
																						48	2.08	72	120	194.08
																						49	1.8	72	140	213.8
																						50	1.58	120	120	241.58
																						51	1.76	32	140	173.76
																						52	2.04	112	120	234.04
																						53	2	88	120	210
																						54	1.76	104	120	225.76
																						55	2.1	72	120	194.1
																						56	2.12	104	120	226.12
																						57	1.8	88	120	209.8
																						58	2.66	40	120	162.66
																						59	1.84	104	100	205.84
																						60	2	72	120	194
																						61	1.68	152	120	273.68
																						62	2.02	88	120	210.02
																						63	1.94	128	120	249.94
																						64	1.5	88	120	209.5
																						65	1.38	152	120	273.38
																						66	2.14	80	140	222.14
																						67	1.84	80	120	201.84
																						68	2	96	120	218
																						69	1.98	80	120	201.98
																						70	1.88	128	120	249.88
																						71	1.56	136	120	257.56
																						72	1.6	96	120	217.6
																						73	1.44	160	120	281.44
																						74	1.54	136	140	277.54
																						75	1.8	128	120	249.8
																						76	2.46	24	120	146.46
																						77	2.5	64	120	186.5
																						78	1.58	104	120	225.58
																						79	1.9	120	100	221.9
																						80	1.5	144	100	245.5
																						81	1.4	160	120	281.4
																						82	1.44	136	120	257.44
																						83	1.92	136	120	257.92
																						84	2.1	128	120	250.1
																						85	1.62	128	120	249.62
																						86	1.46	160	100	261.46
																						87	1.84	48	100	149.84
																						88	2	64	120	186
																						89	1.72	104	140	245.72
																						90	1.58	136	120	257.58
																						91	1.52	96	120	217.52
																						92	2.6	56	120	178.6
																						93	1.86	80	120	201.86
																						94	1.38	128	100	229.38
																						95	2.06	24	140	166.06
																						96	1.38	192	100	293.38
																						97	1.7	88	120	209.7
																						98	1.68	96	120	217.68
																						99	1.62	128	120	249.62
																						100	2	40	140	182
																						101	1.7	88	140	229.7
																						102	1.7	104	100	205.7
																						103	1.84	88	120	209.84
																						104	1.7	216	100	317.7
																						105	1.98	88	100	189.98
																						106	1.62	104	140	245.62
																						107	1.4	128	120	249.4
																						108	1.58	152	120	273.58
																						109	1.46	112	140	253.46
																						110	1.8	64	140	205.8
																						111	1.8	48	140	189.8
																						112	1.6	160	120	281.6
																						113	2.1	32	120	154.1
																						114	2.1	88	120	210.1
																						115	2.28	40	120	162.28
																						116	1.56	120	120	241.56
																						117	1.84	88	120	209.84
																						118	1.94	32	140	173.94
																						119	2.1	48	120	170.1
																						120	1.72	72	140	213.72
																						121	1.78	120	120	241.78
																						122	2.16	72	120	194.16
																						123	1.64	112	120	233.64
																						124	1.84	128	120	249.84
																						125	1.82	72	140	213.82
																						126	1.9	40	120	161.9
																						127	1.96	32	120	153.96
																						128	2	56	120	178
																						129	1.58	112	100	213.58
																						130	1.42	152	120	273.42
																						131	1.8	128	120	249.8
																						132	1.58	120	120	241.58
																						133	1.66	96	120	217.66
																						134	1.82	104	120	225.82
																						135	1.78	104	140	245.78
																						136	1.78	80	120	201.78
																						137	1.8	64	140	205.8
																						138	1.96	128	100	229.96
																						139	1.36	104	120	225.36
																						140	2.08	56	140	198.08
																						141	2.06	88	120	210.06
																						142	1.48	120	120	241.48
																						143	1.88	80	140	221.88
																						144	1.94	88	140	229.94
																						145	1.28	160	120	281.28
																						146	1.72	168	100	269.72
																						147	2	104	100	206
																						148	2.24	96	100	198.24
																						149	1.76	88	120	209.76
																						150	2.06	128	100	230.06
																						151	2.44	48	120	170.44
																						152	1.92	72	140	213.92
																						153	2.06	48	120	170.06
																						154	1.92	104	120	225.92
																						155	1.74	144	120	265.74
																						156	1.18	200	120	321.18
																						157	1.3	168	120	289.3
																						158	1.64	120	120	241.64
																						159	1.56	136	120	257.56
																						160	1.74	88	120	209.74
																						161	2.16	48	120	170.16
																						162	1.72	128	120	249.72
																						163	1.74	136	140	277.74
																						164	2.16	56	140	198.16
																						165	1.42	136	120	257.42
																						166	1.44	120	140	261.44
																						167	1.82	112	100	213.82
																						168	1.4	128	120	249.4
																						169	1.72	72	120	193.72
																						170	1.92	56	120	177.92
																						171	1.72	104	120	225.72
																						172	1.68	112	120	233.68
																						173	1.92	80	140	221.92
																						174	1.76	128	100	229.76
																						175	1.92	88	120	209.92
																						176	1.96	8	140	149.96
																						177	1.68	136	120	257.68
																						178	1.84	104	120	225.84
																						179	1.78	80	120	201.78
																						180	1.72	32	140	173.72
																						181	1.54	112	120	233.54
																						182	1.62	128	120	249.62
																						183	1.76	104	120	225.76
																						184	1.52	144	120	265.52
																						185	1.92	80	120	201.92
																						186	1.68	80	120	201.68
																						187	2.02	56	160	218.02
																						188	1.66	56	140	197.66
																						189	1.84	120	100	221.84
																						190	2.32	56	100	158.32
																						191	2.4	40	120	162.4
																						192	1.68	80	120	201.68
																						193	1.78	112	120	233.78
																						194	2.16	64	120	186.16
																						195	2.1	32	120	154.1
																						196	1.84	96	140	237.84
																						197	1.78	72	120	193.78
																						198	1.56	184	120	305.56
																						199	1.56	152	100	253.56
																						200	1.84	80	140	221.84

## Sheet: Figure 10.12
	Scenario Summary
			Current Values:	Q8R5	Q8R8	Q10R5	Q10R8	Q12R5	Q12R8	Q14R5	Q14R8
				Q=8, R=5	Q=8,R=8	Q=10, R=5	Q=10, R=8	Q=12, R=5	Q=12, R=8	Q=14, R=5	Q=14, R=8
	Changing Cells:
		$T$11	10	8	8	10	10	12	12	14	14
		$T$12	5	5	8	5	8	5	8	5	8
	Result Cells:
		$U$27	1.7742	1.3906	2.4678	1.7866	2.5819	2.2028	3.0478	2.692	3.5398
		$U$28	100.48	111.64	44.96	108.6	51.2	91.84	43.44	83.08	40.84
		$U$29	121.9	144.6	177.1	121.2	141.1	105.9	119.2	94.9	104.8
		$U$30	221.887	261.166	222.188	223.284	194.029	193.871	165.449	174.682	145.588
	Notes: Current Values column represents values of changing cells at
	time Scenario Summary Report was created. Changing cells for each
	scenario are highlighted in gray.
