# Supplementary material
Source: publisher site journal article supplement (https://www.degruyterbrill.com/publication/isbn/9781501506208/downloadAsset/9781501506208_additional%20material.zip)
Supplement: Supplementary file 72 [file Figure 11.14.xlsx]

## Sheet: Figure 11.14
Midwestern Electric - Scatter Chart
Year (X)	Demand (Y)
2002	64
2003	68
2004	72
2005	74
2006	79
2007	82
2008	90
2009	105
2010	117
2011	122
