# Supplementary material
Source: publisher site journal article supplement (https://www.degruyterbrill.com/publication/isbn/9781501506208/downloadAsset/9781501506208_additional%20material.zip)
Supplement: Supplementary file 74 [file Figure 11.20.xlsx]

## Sheet: Figure 11.20
Eichler Supplies
Year	Month	Demand	Average Demand	Ratio	Seasonal Index
1	January	80	94	0.851064	0.957447
	February	75	94	0.797872	0.851064
	March	80	94	0.851064	0.904255
	April	90	94	0.957447	1.06383
	May	115	94	1.2234	1.30851
	June	110	94	1.17021	1.2234
	July	100	94	1.06383	1.11702
	August	90	94	0.957447	1.06383
	September	85	94	0.904255	0.957447
	October	75	94	0.797872	0.851064
	November	75	94	0.797872	0.851064
	December	80	94	0.851064	0.851064
2	January	100	94	1.06383
	February	85	94	0.904255
	March	90	94	0.957447
	April	110	94	1.17021
	May	131	94	1.39362
	June	120	94	1.2766
	July	110	94	1.17021
	August	110	94	1.17021
	September	95	94	1.01064
	October	85	94	0.904255
	November	85	94	0.904255
	December	80	94	0.851064
