# Supplementary material
Source: publisher site journal article supplement (https://www.degruyterbrill.com/publication/isbn/9781501506208/downloadAsset/9781501506208_additional%20material.zip)
Supplement: Supplementary file 78 [file Figure 11.37.xlsx]

## Sheet: Figure 11.37
Solved Problem 11-1
Forecasting		Exponential smoothing
Input Data			Forecast Error Analysis
Period	Actual value		Forecast	Error	Absolute error	Squared error	Absolute % error
Year 1	45		42
Year 2	50		42.6	7.4	7.4	54.76	0.148
Year 3	52		44.08	7.92	7.92	62.7264	0.152308
Year 4	56		45.664	10.336	10.336	106.833	0.184571
Year 5	58		47.7312	10.2688	10.2688	105.448	0.177048
			Average		8.9812	82.4419	0.165482
Alpha	0.2				MAD	MSE	MAPE
Next period	49.785
