# Supplementary material
Source: publisher site journal article supplement (https://www.degruyterbrill.com/publication/isbn/9781501506208/downloadAsset/9781501506208_additional%20material.zip)
Supplement: Supplementary file 83 [file Managerial Decision Modeling 4th Edition Errata (Updated Apr2018).docx]

Managerial Decision Modeling: Business Analytics with Spreadsheets

Balakrishnan, Render, Stair, and Munson

Fourth Edition

Errata

| **Chapter** | **Page** | **Location** | **As Printed in Text** | **Correct Text** |
| --- | --- | --- | --- | --- |
| 2 | 43 | Line -2 | *T* ≤ 100 | *T* ≥ 100 |
| 2 | 100 | Line -3 (Problem 2-55) | B ≤ 0.25(A + B + Y + Z) | B ≤ 0.25(A + B + C + D) |
| 4 | 236 | Problem 4-38, part (b) | maximum tables | minimum tables |
| 4 | 236 | Problem 4-38, part (c) | maximum tables | minimum tables |
| 6 | 380 | Line 7 | 50*q*1 + 45*q*2 + 40*q*1 | 50*q*1 + 45*q*2 + 40*q*3 |
| 6 | 381 | Problem 6-52, part (e) | 10A − 4A2 = 2 | 10A − 4A2 = 2 |
| 7 | 447 | Immediate Predecessors for Activity T in Table for Problem 7-42 | E,P,V | E,V |
| 8 | 475 | Line -1 | *P*(LD|NS) = 0.443 | *P*(LD|NS) = 0.434 |
| 10 | 645 | Line 9 | The Switcher’s Choice would simply cell-reference column B. | The Switcher’s Choice would be =IF(B4=D4,"Wrong",B4) [for row 4]. |
| 11 | 669 | Table 11.4 | 2007 80 | 2007 82 |
| 11 | 669 | Table 11.4 | 2010 142 | 2010 117 |
| Appendix D |  | 1-33 (c) | $4,122.50 | $3,616.25 |
|  |  | 11-49 (b) | 482.88 | 496.88 |
|  |  | 11-55 (b) | second student = 3.83 | second student = 4.01 |
